# Supplementary material for: Gelserancines A–E, monoterpenoid indole alkaloids with unusual skeletons from Gelsemium elegans
Source: Royal Society of Chemistry journal article supplement (doi:10.1039/d0qo01559h), 2021-01-01
Supplement: d0qo01559h1.pdf [file d0qo01559h1.pdf]

## **Gelserancines A-E, Monoterpenoid Indole Alkaloids with Unusual Skeletons from *Gelsemium elegans***

Ji-Hong Gu,<sup>‡a</sup> Wei Zhang,<sup>‡a,c</sup> Wen-Ying Cai,<sup>a</sup> Xiao-Xue Fu,<sup>a</sup> Hong-Ling Zhou,<sup>b</sup>  
Ni-Ping Li,<sup>a</sup> Hai-Yan Tian,<sup>a</sup> Jun-Shan Liu,<sup>\*b</sup> Wen-Cai Ye,<sup>\*a</sup> and Lei Wang<sup>\*a</sup>

<sup>a</sup> *Center for Natural Bioactive Molecules and Innovative Drugs, and Guangdong Province Key  
Laboratory of Pharmacodynamic Constituents of TCM and New Drugs Research, College of  
Pharmacy, Jinan University, Guangzhou 510632, P. R. China*

<sup>b</sup> *Third Level Research Laboratory of State Administration of Traditional Chinese Medicine,  
School of Traditional Chinese Medicine, Southern Medical University, Guangzhou 510515, P. R.  
China*

<sup>c</sup> *School of Chinese Materia Medica, Beijing University of Chinese Medicine, Beijing 102488,  
P. R. China*

## Contents

|                                                                                                     |    |
|-----------------------------------------------------------------------------------------------------|----|
| 1. Figure S1. Anti-inflammatory effects of compounds <b>1-5</b> .....                               | 6  |
| 2. Structural elucidation of <b>6-10</b> .....                                                      | 7  |
| 3. Dynamic HPLC analysis of <b>4</b> and <b>5</b> with different temperatures and irradiations .... | 8  |
| Figure S3. UV spectrum of <b>1</b> in MeOH .....                                                    | 9  |
| Figure S4. IR (KBr disc) spectrum of <b>1</b> .....                                                 | 9  |
| Figure S5. HR-ESI-MS spectrum of <b>1</b> .....                                                     | 10 |
| Figure S6. <sup>1</sup> H NMR spectrum (400 MHz) of <b>1</b> in CDCl <sub>3</sub> .....             | 10 |
| Figure S7. <sup>1</sup> H NMR spectrum (500 MHz) of <b>1</b> in CDCl <sub>3</sub> .....             | 11 |
| Figure S8. <sup>13</sup> C NMR spectrum of <b>1</b> in CDCl <sub>3</sub> .....                      | 11 |
| Figure S9. DEPT-135 spectrum of <b>1</b> in CDCl <sub>3</sub> .....                                 | 12 |
| Figure S10. <sup>1</sup> H- <sup>1</sup> H COSY spectrum of <b>1</b> in CDCl <sub>3</sub> .....     | 12 |
| Figure S11. HSQC NMR spectrum of <b>1</b> in CDCl <sub>3</sub> .....                                | 13 |
| Figure S12. HMBC spectrum of <b>1</b> in CDCl <sub>3</sub> .....                                    | 13 |
| Figure S13. NOESY spectrum of <b>1</b> in CDCl <sub>3</sub> .....                                   | 14 |
| Figure S14. UV spectrum of <b>2</b> in MeOH .....                                                   | 14 |
| Figure S15. IR (KBr disc) spectrum of <b>2</b> .....                                                | 15 |
| Figure S16. HR-ESI-MS spectrum of <b>2</b> .....                                                    | 15 |
| Figure S17. <sup>1</sup> H NMR spectrum of <b>2</b> in CDCl <sub>3</sub> .....                      | 16 |
| Figure S18. <sup>13</sup> C NMR spectrum of <b>2</b> in CDCl <sub>3</sub> .....                     | 16 |
| Figure S19. DEPT-135 spectrum of <b>2</b> in CDCl <sub>3</sub> .....                                | 17 |
| Figure S20. <sup>1</sup> H- <sup>1</sup> H COSY spectrum of <b>2</b> in CDCl <sub>3</sub> .....     | 17 |
| Figure S21. HSQC spectrum of <b>2</b> in CDCl <sub>3</sub> .....                                    | 18 |
| Figure S22. HMBC spectrum of <b>2</b> in CDCl <sub>3</sub> .....                                    | 18 |
| Figure S23. NOESY spectrum of <b>2</b> in CDCl <sub>3</sub> .....                                   | 19 |
| Figure S24. UV spectrum of <b>3</b> in MeOH .....                                                   | 19 |
| Figure S25. IR (KBr disc) spectrum of <b>3</b> .....                                                | 20 |
| Figure S26. HR-ESI-MS spectrum of <b>3</b> .....                                                    | 20 |

|                                                                                                   |    |
|---------------------------------------------------------------------------------------------------|----|
| Figure S27. $^1\text{H}$ NMR spectrum of <b>3</b> in $\text{CDCl}_3$ .....                        | 21 |
| Figure S28. $^{13}\text{C}$ NMR spectrum of <b>3</b> in $\text{CDCl}_3$ .....                     | 21 |
| Figure S29. DEPT-135 spectrum of <b>3</b> in $\text{CDCl}_3$ .....                                | 22 |
| Figure S30. $^1\text{H}$ - $^1\text{H}$ COSY spectrum of <b>3</b> in $\text{CDCl}_3$ .....        | 22 |
| Figure S31. HSQC spectrum of <b>3</b> in $\text{CDCl}_3$ .....                                    | 23 |
| Figure S32. HMBC spectrum of <b>3</b> in $\text{CDCl}_3$ .....                                    | 23 |
| Figure S33. NOESY spectrum of <b>3</b> in $\text{CDCl}_3$ .....                                   | 24 |
| Figure S34. UV spectrum of <b>4</b> in MeOH.....                                                  | 24 |
| Figure S35. IR (KBr disc) spectrum of <b>4</b> .....                                              | 25 |
| Figure S36. HR-ESI-MS spectrum of <b>4</b> .....                                                  | 25 |
| Figure S37. $^1\text{H}$ NMR spectrum of <b>4</b> in $\text{CD}_3\text{OD}$ .....                 | 26 |
| Figure S38. $^{13}\text{C}$ NMR spectrum of <b>4</b> in $\text{CD}_3\text{OD}$ .....              | 26 |
| Figure S39. DEPT-135 spectrum of <b>4</b> in $\text{CD}_3\text{OD}$ .....                         | 27 |
| Figure S40. $^1\text{H}$ - $^1\text{H}$ COSY spectrum of <b>4</b> in $\text{CD}_3\text{OD}$ ..... | 27 |
| Figure S41. HSQC spectrum of <b>4</b> in $\text{CD}_3\text{OD}$ .....                             | 28 |
| Figure S42. HMBC spectrum of <b>4</b> in $\text{CD}_3\text{OD}$ .....                             | 28 |
| Figure S43. NOESY spectrum of <b>4</b> in $\text{CD}_3\text{OD}$ .....                            | 29 |
| Figure S44. UV spectrum of <b>5</b> in MeOH.....                                                  | 29 |
| Figure S45. IR (KBr disc) spectrum of <b>5</b> .....                                              | 30 |
| Figure S46. HR-ESI-MS spectrum of <b>5</b> .....                                                  | 30 |
| Figure S47. $^1\text{H}$ NMR spectrum of <b>5</b> in $\text{CD}_3\text{OD}$ .....                 | 31 |
| Figure S48. $^{13}\text{C}$ NMR spectrum of <b>5</b> in $\text{CD}_3\text{OD}$ .....              | 31 |
| Figure S49. DEPT-135 spectrum of <b>5</b> in $\text{CD}_3\text{OD}$ .....                         | 32 |
| Figure S50. $^1\text{H}$ - $^1\text{H}$ COSY spectrum of <b>5</b> in $\text{CD}_3\text{OD}$ ..... | 32 |
| Figure S51. HSQC spectrum of <b>5</b> in $\text{CD}_3\text{OD}$ .....                             | 33 |
| Figure S52. HMBC spectrum of <b>5</b> in $\text{CD}_3\text{OD}$ .....                             | 33 |
| Figure S53. NOESY spectrum of <b>5</b> in $\text{CD}_3\text{OD}$ .....                            | 34 |
| Figure S54. UV spectrum of <b>6</b> in MeOH.....                                                  | 34 |
| Figure S55. IR (KBr disc) spectrum of <b>6</b> .....                                              | 35 |
| Figure S56. HR-ESI-MS spectrum of <b>6</b> .....                                                  | 35 |

|                                                                                                                   |    |
|-------------------------------------------------------------------------------------------------------------------|----|
| Figure S57. $^1\text{H}$ NMR spectrum of <b>6</b> in $\text{CDCl}_3$ .....                                        | 36 |
| Figure S58. $^{13}\text{C}$ NMR spectrum of <b>6</b> in $\text{CDCl}_3$ .....                                     | 36 |
| Figure S59. DEPT-135 spectrum of <b>6</b> in $\text{CDCl}_3$ .....                                                | 37 |
| Figure S60. UV spectrum of <b>7</b> in MeOH.....                                                                  | 37 |
| Figure S61. IR (KBr disc) spectrum of <b>7</b> .....                                                              | 38 |
| Figure S62. HR-ESI-MS spectrum of <b>7</b> .....                                                                  | 38 |
| Figure S63. $^1\text{H}$ NMR spectrum of <b>7</b> in $\text{CDCl}_3$ .....                                        | 39 |
| Figure S64. $^{13}\text{C}$ NMR spectrum of <b>7</b> in $\text{CDCl}_3$ .....                                     | 39 |
| Figure S65. DEPT-135 spectrum of <b>7</b> in $\text{CDCl}_3$ .....                                                | 40 |
| Figure S66. UV spectrum of <b>8</b> in MeOH.....                                                                  | 40 |
| Figure S67. IR (KBr disc) spectrum of <b>8</b> .....                                                              | 41 |
| Figure S68. HR-ESI-MS spectrum of <b>8</b> .....                                                                  | 41 |
| Figure S69. $^1\text{H}$ NMR spectrum of <b>8</b> in $\text{CDCl}_3$ .....                                        | 42 |
| Figure S70. $^{13}\text{C}$ NMR spectrum of <b>8</b> in $\text{CDCl}_3$ .....                                     | 42 |
| Figure S71. DEPT-135 spectrum of <b>8</b> in $\text{CDCl}_3$ .....                                                | 43 |
| Figure S72. UV spectrum of <b>9</b> in MeOH.....                                                                  | 43 |
| Figure S73. IR (KBr disc) spectrum of <b>9</b> .....                                                              | 44 |
| Figure S74. HR-ESI-MS spectrum of <b>9</b> .....                                                                  | 44 |
| Figure S75. $^1\text{H}$ NMR spectrum of <b>9</b> in $\text{CDCl}_3$ (80%) + $\text{CD}_3\text{OD}$ (20%).....    | 45 |
| Figure S76. $^{13}\text{C}$ NMR spectrum of <b>9</b> in $\text{CDCl}_3$ (80%) + $\text{CD}_3\text{OD}$ (20%)..... | 45 |
| Figure S77. DEPT-135 spectrum of <b>9</b> in $\text{CDCl}_3$ (80%) + $\text{CD}_3\text{OD}$ (20%).....            | 46 |
| Figure S78. UV spectrum of <b>10</b> in MeOH.....                                                                 | 46 |
| Figure S79. IR (KBr disc) spectrum of compound <b>10</b> .....                                                    | 47 |
| Figure S80. HR-ESI-MS spectrum of <b>10</b> .....                                                                 | 47 |
| Figure S81. $^1\text{H}$ NMR spectrum of <b>10</b> in $\text{CDCl}_3$ .....                                       | 48 |
| Figure S82. $^{13}\text{C}$ NMR spectrum of <b>10</b> in $\text{CDCl}_3$ .....                                    | 48 |
| Figure S83. DEPT-135 spectrum of <b>10</b> in $\text{CDCl}_3$ .....                                               | 49 |
| Figure S84. Dynamic HPLC spectra of <b>4</b> with temperature increase.....                                       | 49 |
| Figure S85. Dynamic HPLC spectra of <b>5</b> with temperature increase.....                                       | 50 |
| Figure S86. Dynamic HPLC spectra of <b>4</b> with visible light irradiation.....                                  | 50 |

|                                                                                  |    |
|----------------------------------------------------------------------------------|----|
| Figure S87. Dynamic HPLC spectra of <b>5</b> with visible light irradiation..... | 51 |
| Figure S88. Dynamic HPLC spectra of <b>4</b> with UV irradiation in 254 nm.....  | 51 |
| Figure S89. Dynamic HPLC spectra of <b>5</b> with UV irradiation in 254 nm.....  | 52 |
| Figure S90. Dynamic HPLC spectra of <b>4</b> with UV irradiation in 365 nm.....  | 52 |
| Figure S91. Dynamic HPLC spectra of <b>5</b> with UV irradiation in 365 nm.....  | 53 |
| Notes and references .....                                                       | 54 |

## 1. The anti-inflammatory effects of compounds 1-5.

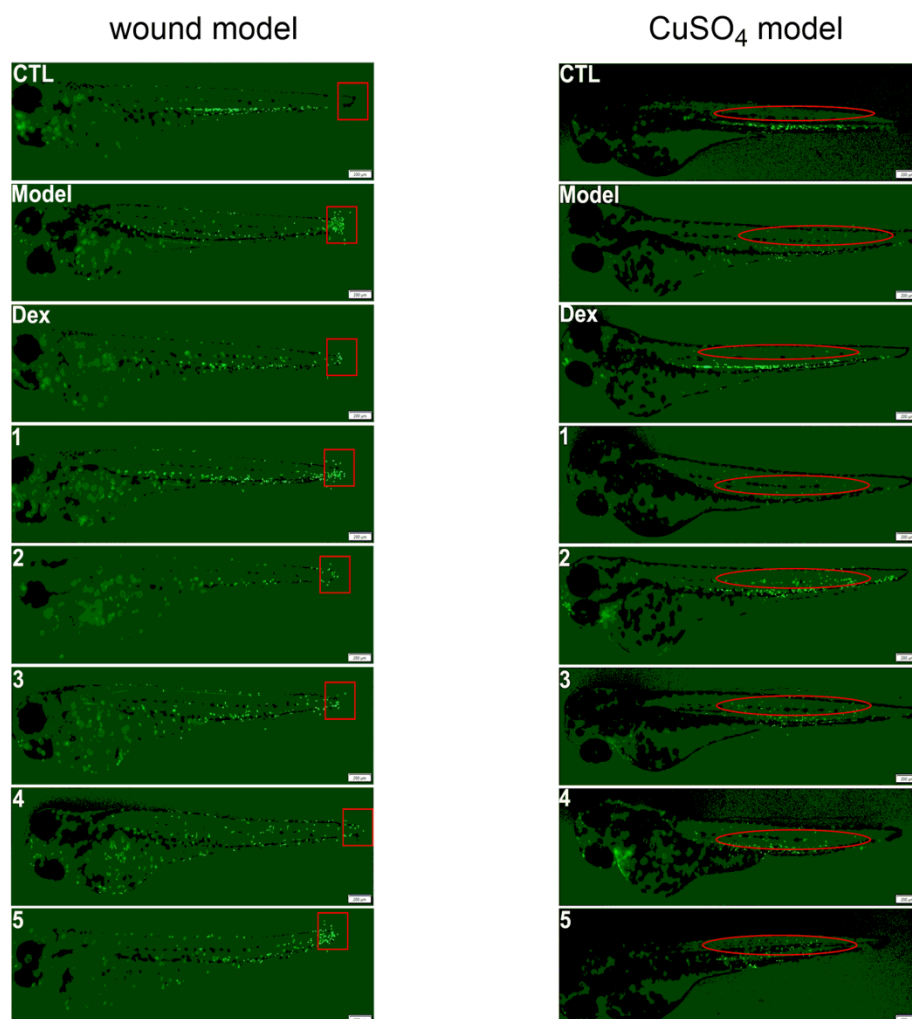

**Figure S1.** Anti-inflammatory effects of compounds **1-5**. The neutrophil number (green fluorescence) in inflammatory sites (red rectangle or ellipse marked) in wound (left panel) and CuSO<sub>4</sub> (right panel) models was observed by fluorescence microscopy (MVX10, Olympus, Japan).

## 2. Structural elucidation of 6-10.

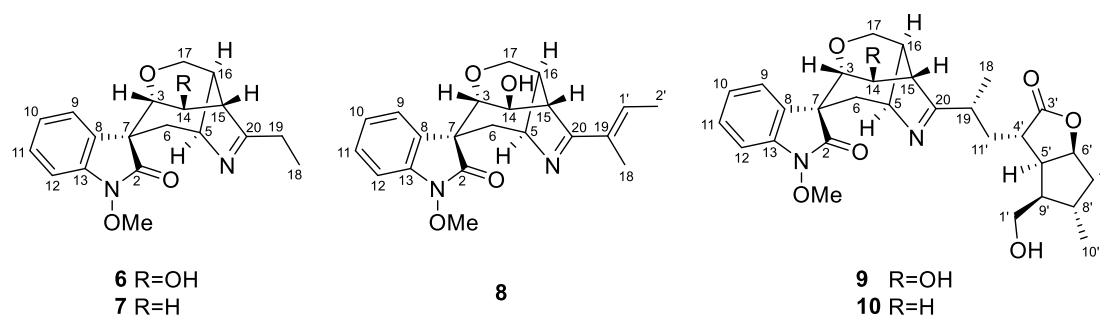

**Figure S2.** Chemical structures of **6-10**.

Compounds **6-10** were identified as 14-hydroxygelsenicine<sup>1</sup>, gelsenicine<sup>2</sup>, 14 $\beta$ -hydroxygelsedethenine<sup>3</sup>, 14 $\alpha$ -hydroxygelsamydine<sup>4</sup>, and gelsamydine<sup>2</sup> by comparison their spectroscopic data with those of literatures, respectively.

**Table S1.** <sup>1</sup>H and <sup>13</sup>C NMR data of compounds **6-10** ( $\delta$  in ppm, *J* in Hz)

| NO.   | <b>6<sup>a</sup></b> |            | <b>7<sup>a</sup></b>     |            | <b>8<sup>a</sup></b> |            | <b>9<sup>b</sup></b> |            | <b>10<sup>b</sup></b> |            |
|-------|----------------------|------------|--------------------------|------------|----------------------|------------|----------------------|------------|-----------------------|------------|
|       | $\delta_H$           | $\delta_C$ | $\delta_H$               | $\delta_C$ | $\delta_H$           | $\delta_C$ | $\delta_H$           | $\delta_C$ | $\delta_H$            | $\delta_C$ |
| 2     |                      | 171.1      |                          | 171.4      |                      | 171.5      |                      | 171.3      |                       | 171.5      |
| 3     | 3.67 br s            | 79.5       | 3.69 dd (4.5, 1.9)       | 75.1       | 3.55 s               | 80.3       | 3.61 s               | 79.4       | 3.64 <sup>c</sup>     | 72.1       |
| 5     | 4.40 m               | 72.2       | 4.37 m                   | 72.6       | 4.46 m               | 73.1       | 4.37 m               | 71.1       | 4.37 m                | 74.9       |
| 6     | 2.41 dd (15.6, 4.7)  | 37.8       | 2.36 <sup>c</sup>        | 37.8       | 2.38 dd (15.5, 4.7)  | 38.2       | 2.50 dd (16.0, 4.9)  | 36.7       | 2.38 <sup>c</sup>     | 37.2       |
|       | 2.30 dd (15.6, 2.0)  |            | 2.25 dd (15.4, 2.2)      |            | 2.27 dd (15.5, 1.9)  |            | 2.27 <sup>c</sup>    |            | 2.38 <sup>c</sup>     |            |
| 7     |                      | 53.9       |                          | 56.0       |                      | 54.5       |                      | 53.7       |                       | 56.2       |
| 8     |                      | 131.8      |                          | 132.4      |                      | 132.5      |                      | 131.2      |                       | 131.9      |
| 9     | 7.50 d (7.6)         | 124.8      | 7.50 d (7.6)             | 124.8      | 7.43 d (7.6)         | 125.5      | 7.53 d (7.6)         | 124.9      | 7.47 d (7.6)          | 125.2      |
| 10    | 7.07 dd (7.6, 7.6)   | 123.8      | 7.03 ddd (7.6, 7.6, 1.0) | 123.5      | 7.00 dd (7.6, 7.6)   | 124.4      | 7.12 dd (7.6, 7.6)   | 123.7      | 7.07 dd (7.6, 7.6)    | 123.6      |
| 11    | 7.26 dd (7.6, 7.6)   | 128.6      | 7.22 ddd (7.6, 7.6, 1.0) | 128.2      | 7.19 dd (7.6, 7.6)   | 129.1      | 7.30 dd (7.6, 7.6)   | 128.3      | 7.25 dd (7.6, 7.6)    | 128.4      |
| 12    | 6.87 d (7.6)         | 107.1      | 6.84 d (7.6)             | 106.7      | 6.79 d (7.6)         | 107.6      | 6.92 d (7.6)         | 106.8      | 6.87 d (7.6)          | 107.0      |
| 13    |                      | 138.2      |                          | 138.2      |                      | 138.9      |                      | 137.8      |                       | 138.5      |
| 14    | 4.45 br s            | 66.8       | 2.35 <sup>c</sup>        | 25.8       | 4.35 d (2.0)         | 68.4       | 4.41 s               | 64.9       | 2.48 m                | 26.7       |
|       |                      |            | 2.10 m                   |            |                      |            |                      |            | 2.12 <sup>c</sup>     |            |
| 15    | 2.88 d (8.5)         | 52.5       | 2.83 t (9.3)             | 39.9       | 3.24 d (8.4)         | 54.5       | 3.10 d (8.1)         | 50.3       | 3.11 t (9.1)          | 39.5       |
| 16    | 2.59 td (8.2, 3.3)   | 38.5       | 2.53 br t (8.2)          | 42.6       | 2.55 td (8.1, 3.3)   | 38.9       | 2.57 m               | 37.8       | 2.50 m                | 40.3       |
| 17    | 4.43 dd (11.1, 3.7)  | 62.1       | 4.26 dd (11.0, 2.8)      | 62.3       | 4.40 dd (11.0, 3.6)  | 62.7       | 4.46 dd (11.0, 3.8)  | 61.0       | 4.27 <sup>c</sup>     | 62.0       |
|       | 4.32 d (11.1)        |            | 4.23 dd (11.0, 1.7)      |            | 4.27 d (11.0)        |            | 4.33 d (11.0)        |            | 4.27 <sup>c</sup>     |            |
| 18    | 1.29 t (7.3)         | 10.2       | 1.25 t (7.4)             | 10.2       | 2.00 s               | 13.7       | 1.29 d (7.3)         | 19.2       | 1.18 d (7.4)          | 20.4       |
| 19    | 2.76 dq (17.3, 7.3)  | 26.3       | 2.68 dq (17.0, 7.4)      | 27.2       |                      | 133.9      |                      | 33.0       | 3.53 <sup>c</sup>     | 35.9       |
|       | 2.48 dq (17.3, 7.3)  |            | 2.37 <sup>c</sup>        |            |                      |            |                      |            |                       |            |
| 20    |                      | 181.3      |                          | 184.6      |                      | 177.8      |                      | 185.3      |                       | 188.2      |
| N-OMe | 3.93 s               | 63.7       | 3.91 s                   | 63.5       | 3.84 s               | 64.1       | 3.91 s               | 63.0       | 3.87 s                | 63.4       |
| 1'    |                      |            |                          |            | 6.27 q (6.8)         | 133.2      | 3.70 m               | 61.0       | 3.63 <sup>c</sup>     | 60.4       |
|       |                      |            |                          |            |                      |            | 3.54 d (11.1)        |            | 3.48 <sup>c</sup>     |            |
| 2'    |                      |            |                          |            | 1.82 d (6.8)         | 15.5       |                      |            |                       |            |
| 3'    |                      |            |                          |            |                      |            |                      | 182.0      |                       | 182.2      |
| 4'    |                      |            |                          |            |                      |            | 3.48 m               | 36.6       | 1.86 m                | 33.3       |
| 5'    |                      |            |                          |            |                      |            | 2.91 m               | 47.9       | 2.83 m                | 48.8       |
| 6'    |                      |            |                          |            |                      |            | 5.01 br t (6.0)      | 82.9       | 4.90 t (7.1)          | 82.1       |
| 7'    |                      |            |                          |            |                      |            | 2.16 dd (13.5, 5.6)  | 41.9       | 2.10 <sup>c</sup>     | 42.6       |
|       |                      |            |                          |            |                      |            | 1.47 m               |            | 1.40 m                |            |
| 8'    |                      |            |                          |            |                      |            | 1.78 <sup>c</sup>    | 29.5       | 1.68 <sup>c</sup>     | 33.2       |
| 9'    |                      |            |                          |            |                      |            | 1.88 m               | 51.7       | 1.72 <sup>c</sup>     | 52.7       |
| 10'   |                      |            |                          |            |                      |            | 0.95 d (6.4)         | 17.0       | 0.87 d (6.3)          | 17.4       |
| 11'   |                      |            |                          |            |                      |            | 2.27 <sup>c</sup>    | 36.8       | 2.29 <sup>c</sup>     | 37.7       |
|       |                      |            |                          |            |                      |            | 1.78 <sup>c</sup>    |            | 2.29 <sup>c</sup>     |            |

<sup>a</sup> Measured in CDCl<sub>3</sub>. <sup>b</sup> Measured in CDCl<sub>3</sub> (80%) + CD<sub>2</sub>O (20%) <sup>c</sup> Overlapped signals.

### **3. Dynamic HPLC analysis of 4 and 5 with different temperatures and irradiations.**

Compounds **4** and **5** were solved in MeOH, then the HPLC spectra were recorded on an Agilent 1260 instrument equipped with DAD detector and a Waters Xbridge™ C<sub>18</sub> OBD reversed-phase column (4.6×250 mm, 5 μm, USA). The column temperature was controlled at 298 K by an Agilent 1260 TCCVL (USA). The mobile phase was MeCN-H<sub>2</sub>O-Et<sub>2</sub>NH (22:78:0.01 v/v/v), and the flow rate was 1 mL/min.

**Elevated-temperature experiment:** Compounds **4** and **5** was protected from light at different temperatures (298, 318, 338, 358 K) and analyzed by HPLC, respectively. Each temperature gradient was holding for 2 hours. (figure S84-85)

**Visible/UV light irradiation experiment:** Compounds **4** and **5** was exposed under an incandescent lamp (as a source of visible light) or UV light (254 or 365 nm) and analyzed by HPLC at different times (0, 1, 4, 24 h, at room temperature). (figure S86-91)



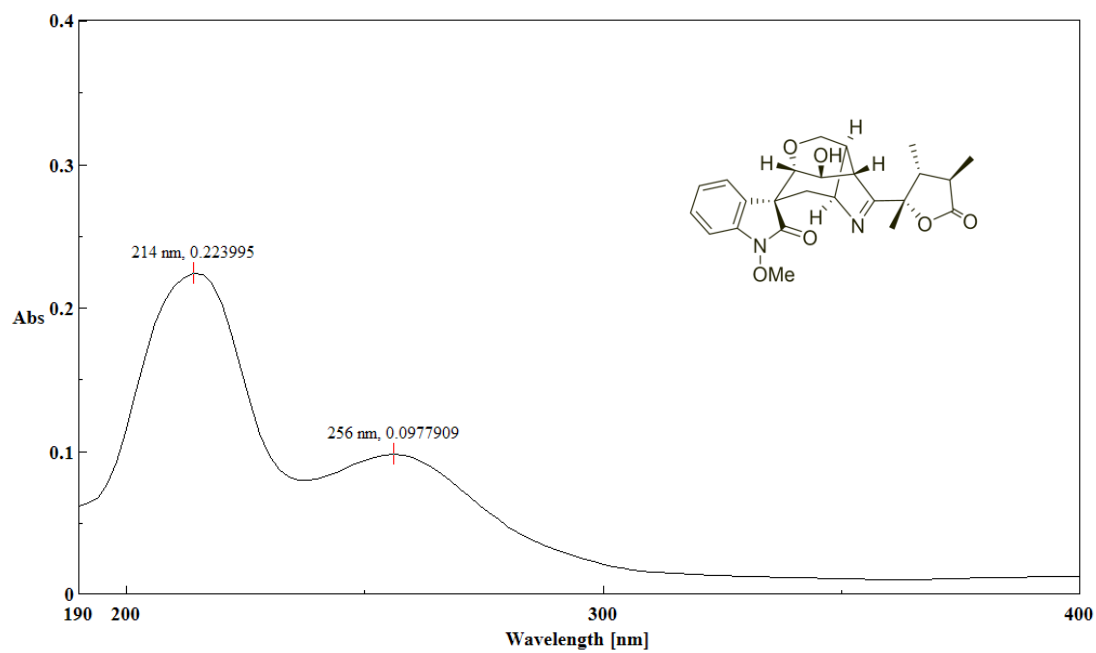

**Figure S3.** The UV of compound **1** in MeOH

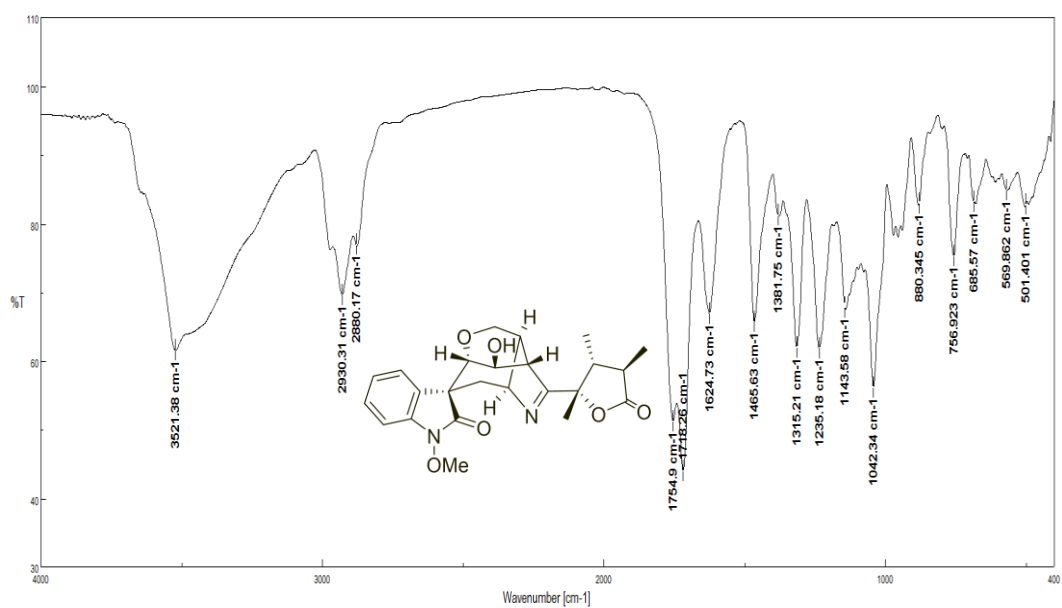

**Figure S4.** The IR (KBr disc) of compound **1**

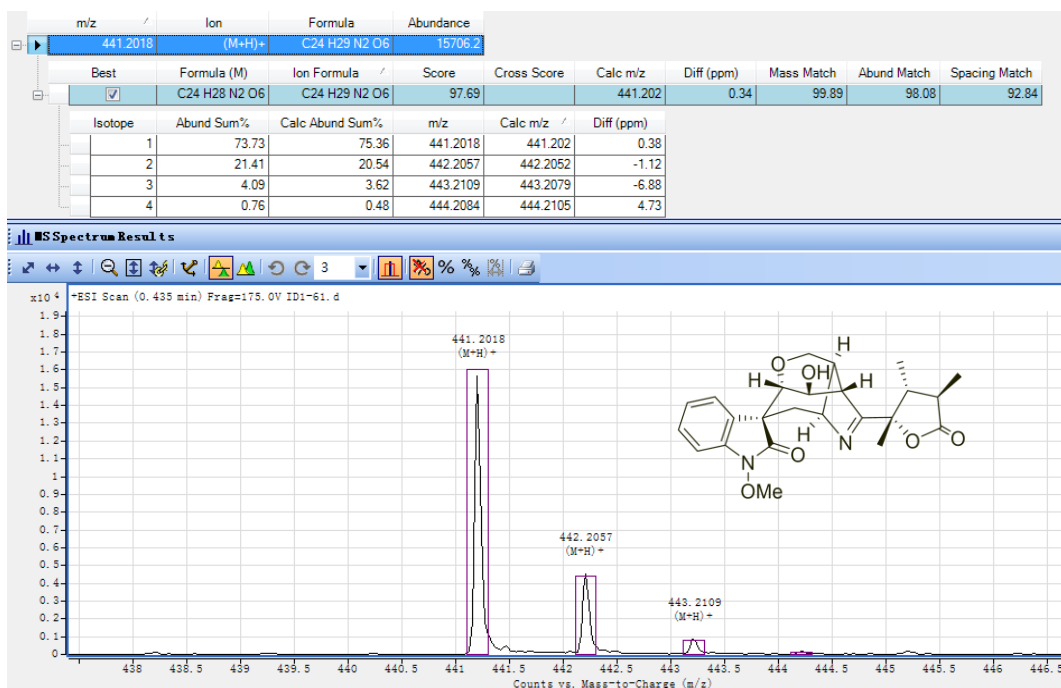

**Figure S5** The HR-ESI-MS of compound **1**

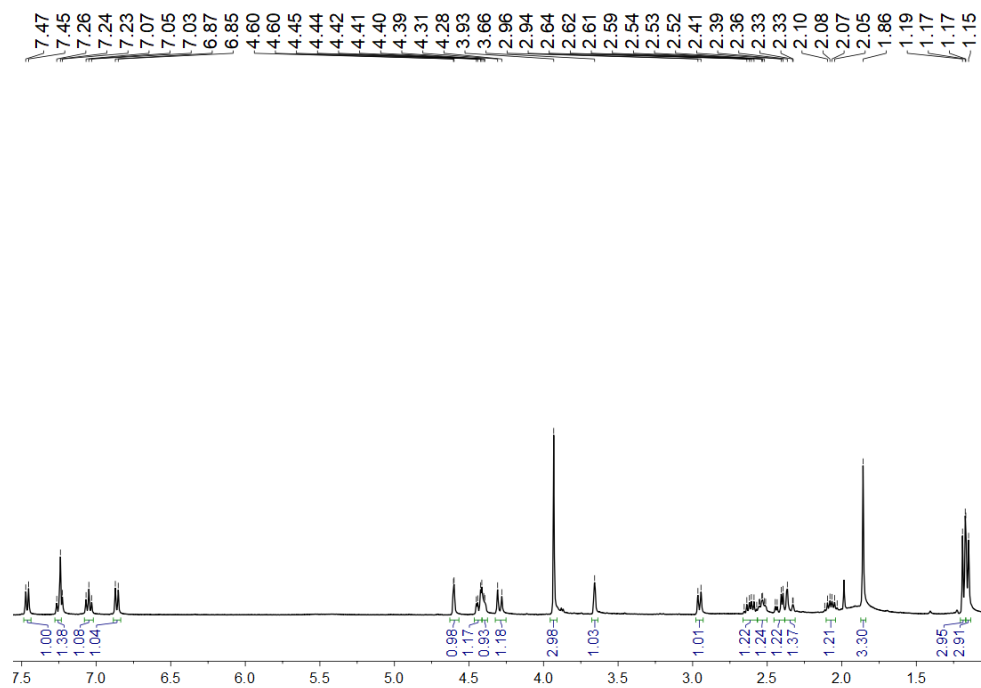

**Figure S6.** The <sup>1</sup>H NMR spectrum (400 MHz) of compound **1** in CDCl<sub>3</sub>

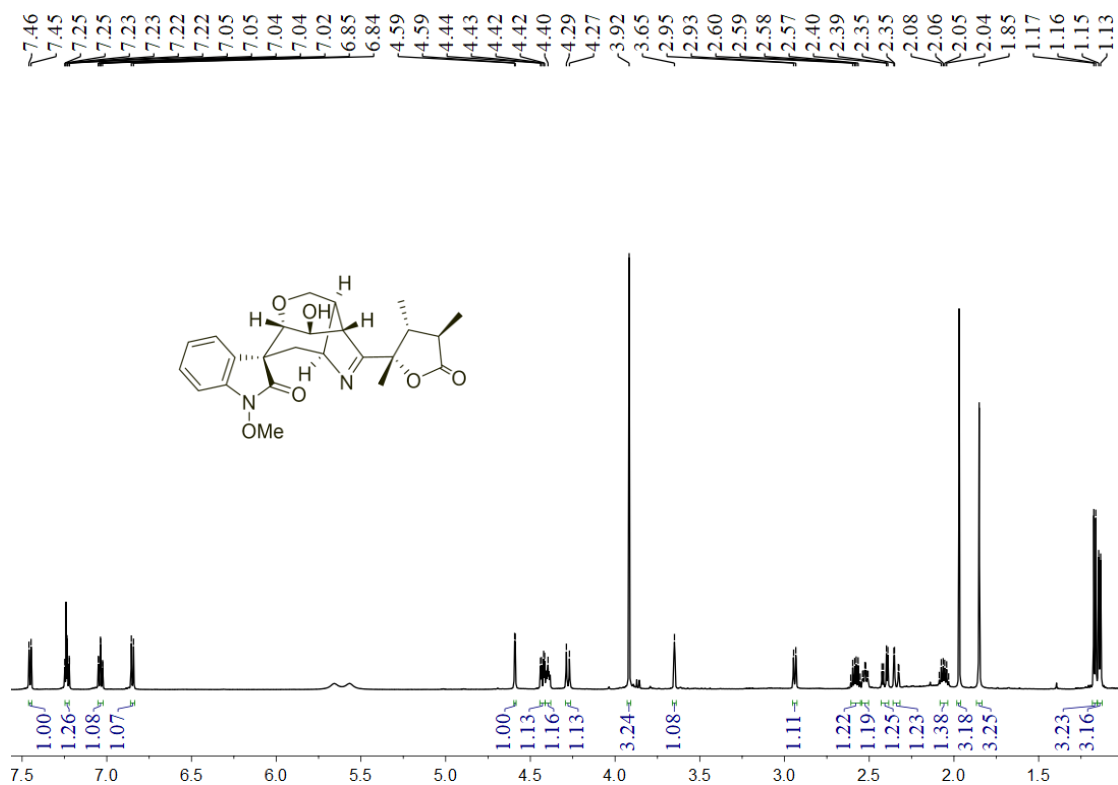

**Figure S7.** The  $^1\text{H}$  NMR spectrum (500 MHz) of compound **1** in  $\text{CDCl}_3$

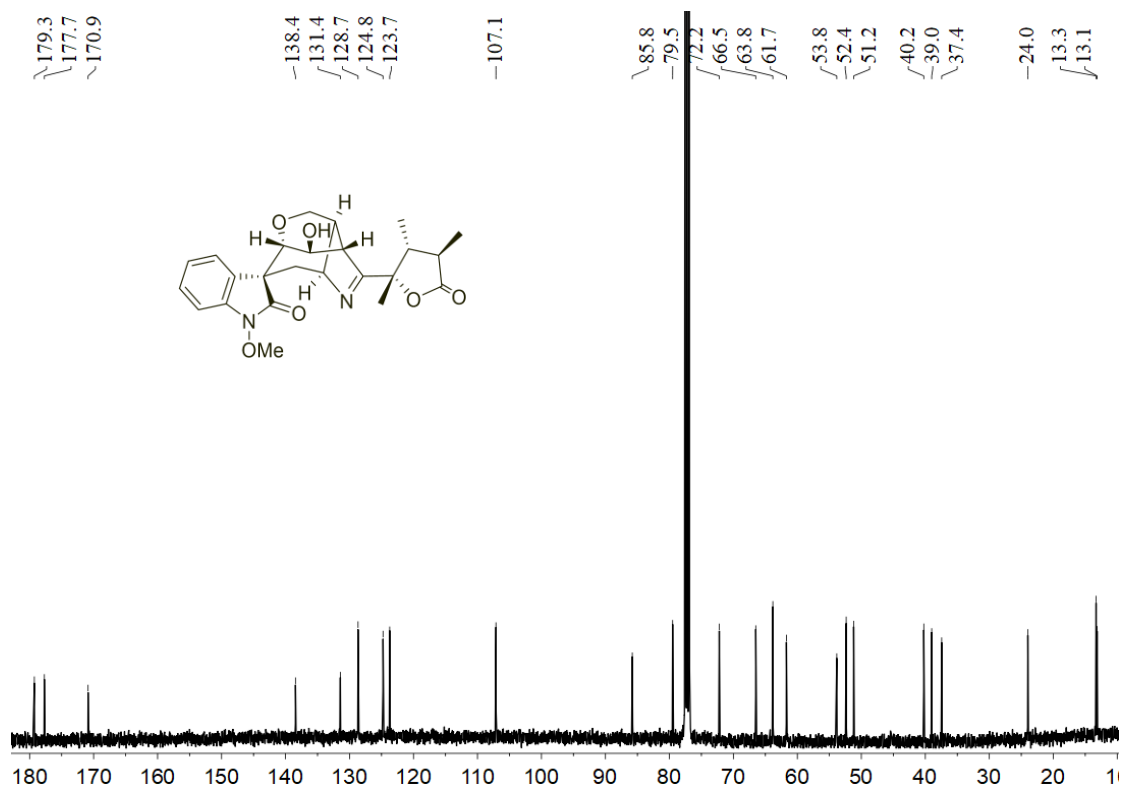

**Figure S8.** The  $^{13}\text{C}$  NMR spectrum of compound **1** in  $\text{CDCl}_3$

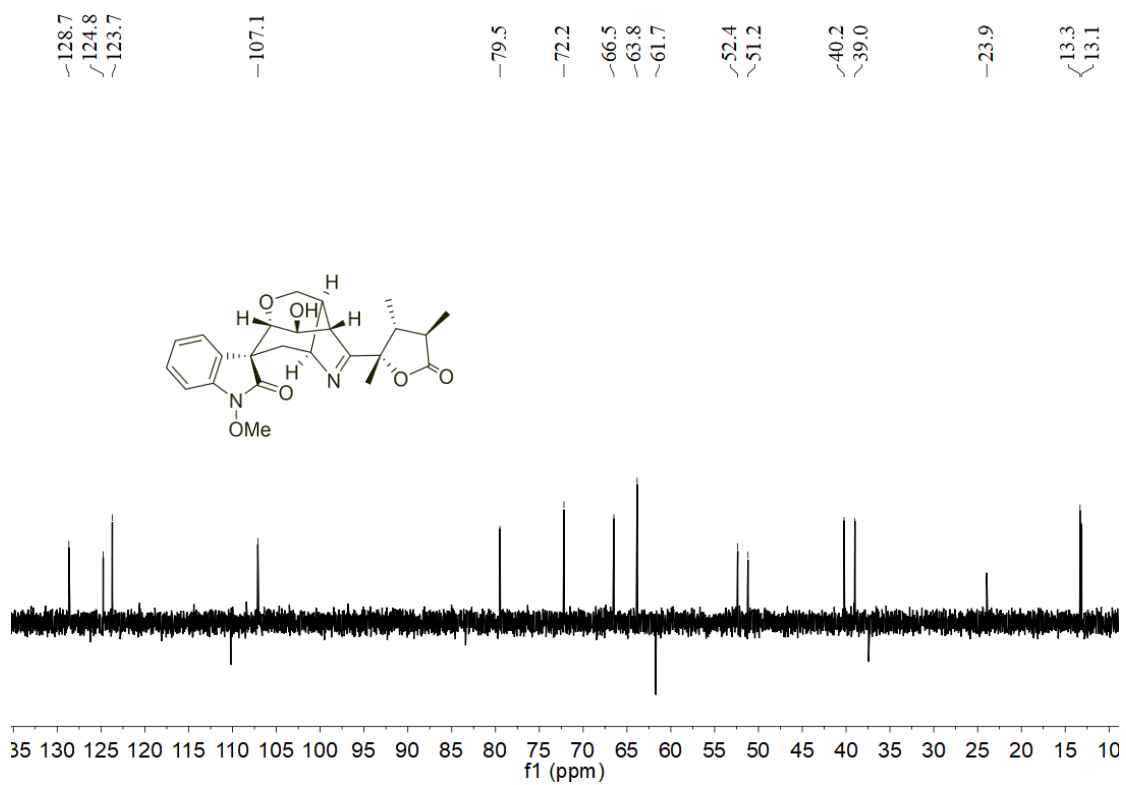

**Figure S9.** The DEPT-135 spectrum of compound **1** in CDCl<sub>3</sub>

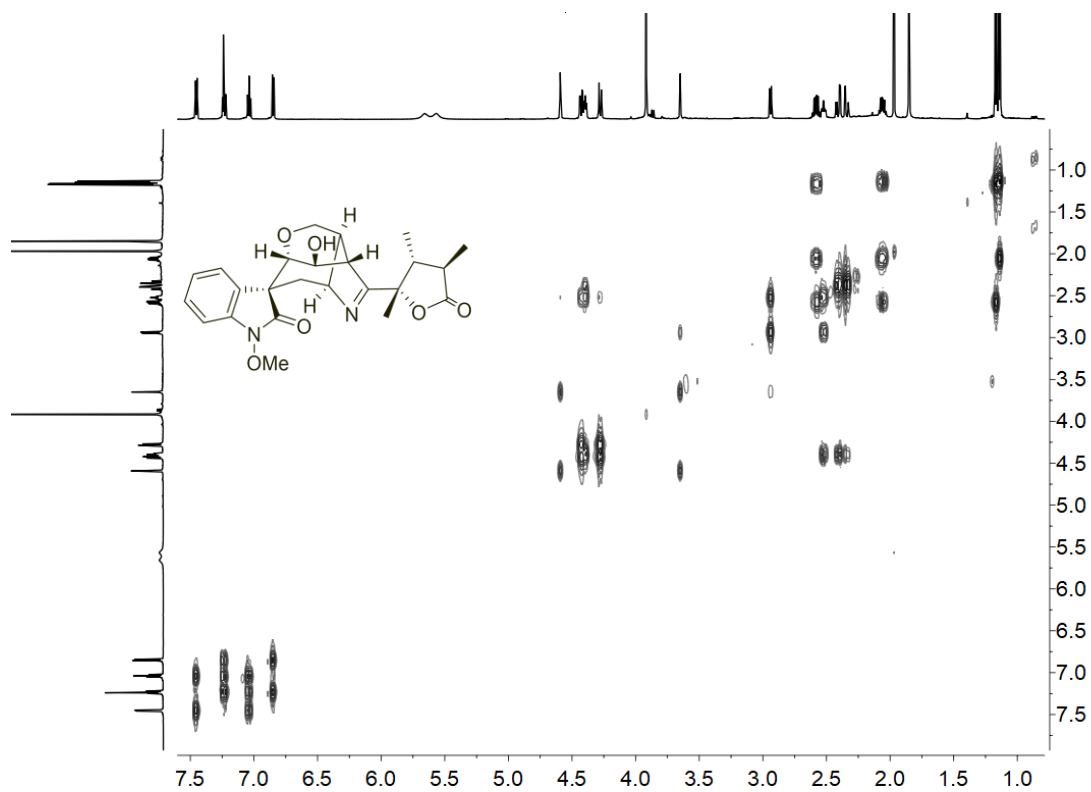

**Figure S10.** The <sup>1</sup>H-<sup>1</sup>H COSY spectrum of compound **1** in CDCl<sub>3</sub>

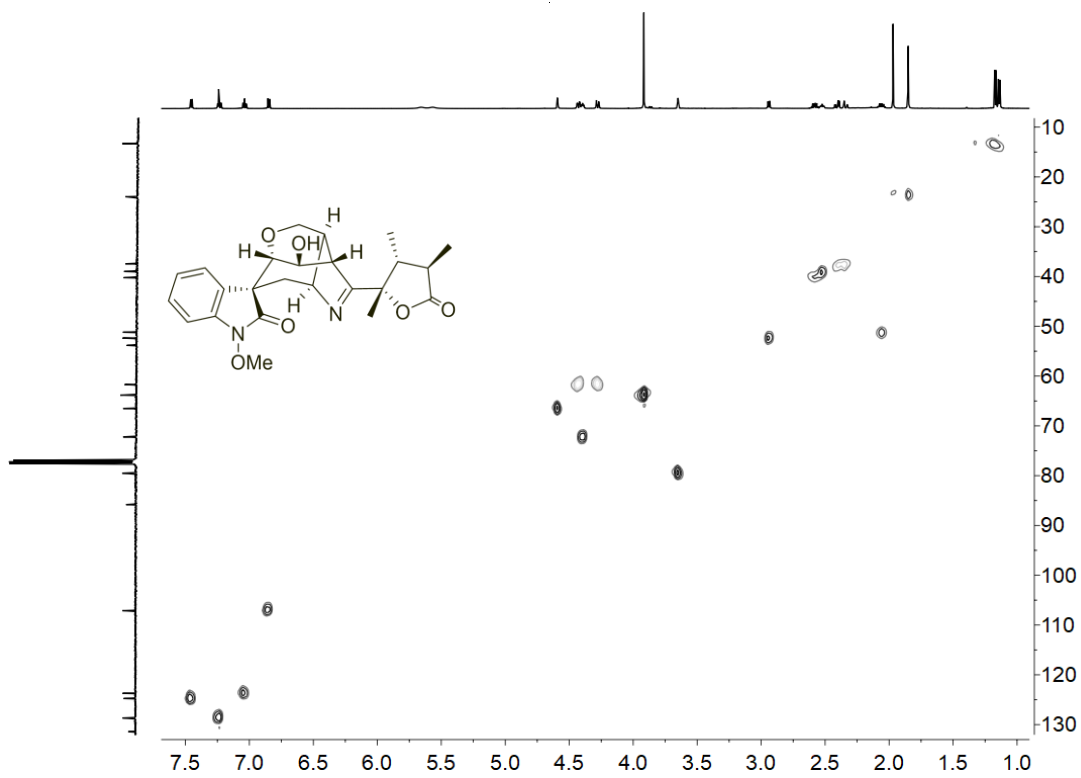

**Figure S11.** The HSQC spectrum of compound **1** in CDCl<sub>3</sub>

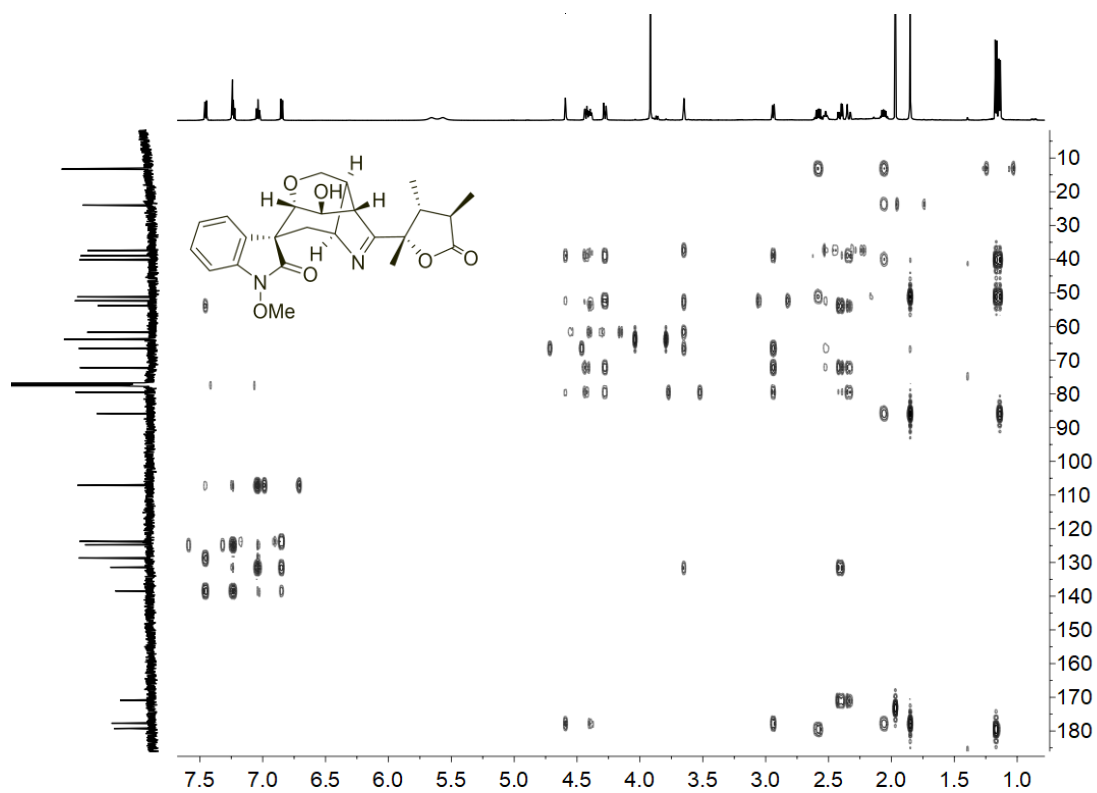

**Figure S12.** The HMBC spectrum of compound **1** in CDCl<sub>3</sub>

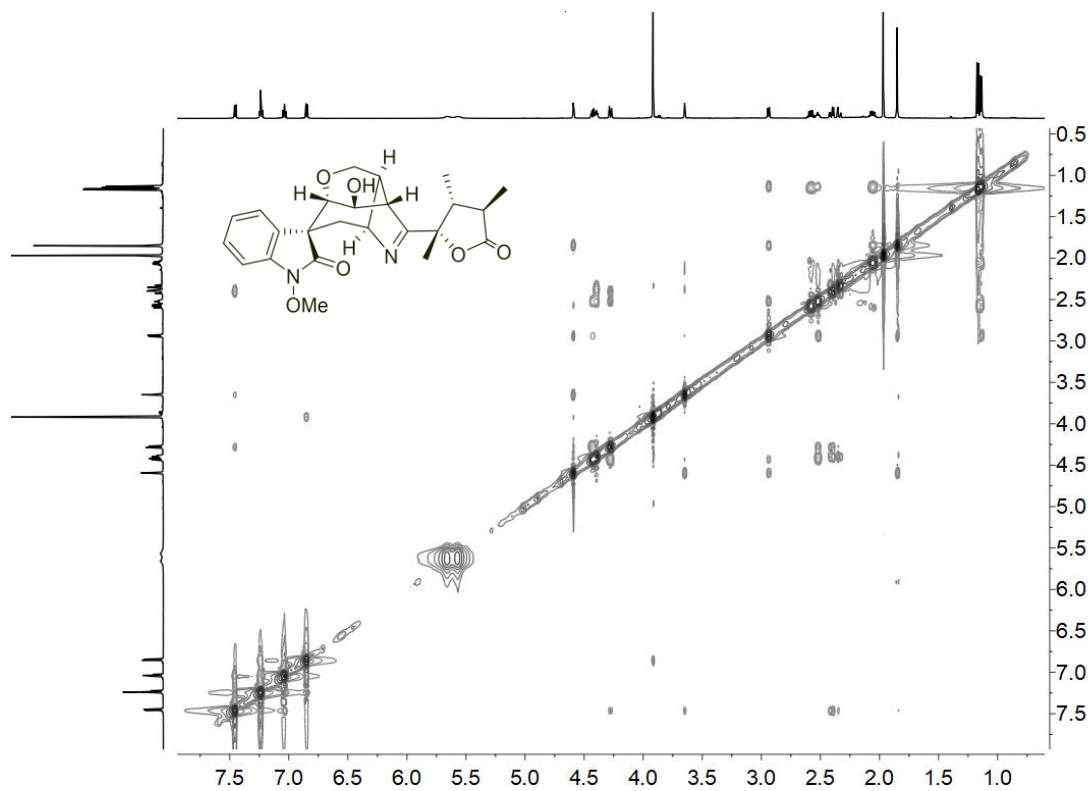

**Figure S13.** The NOESY spectrum of compound **1** in  $\text{CDCl}_3$

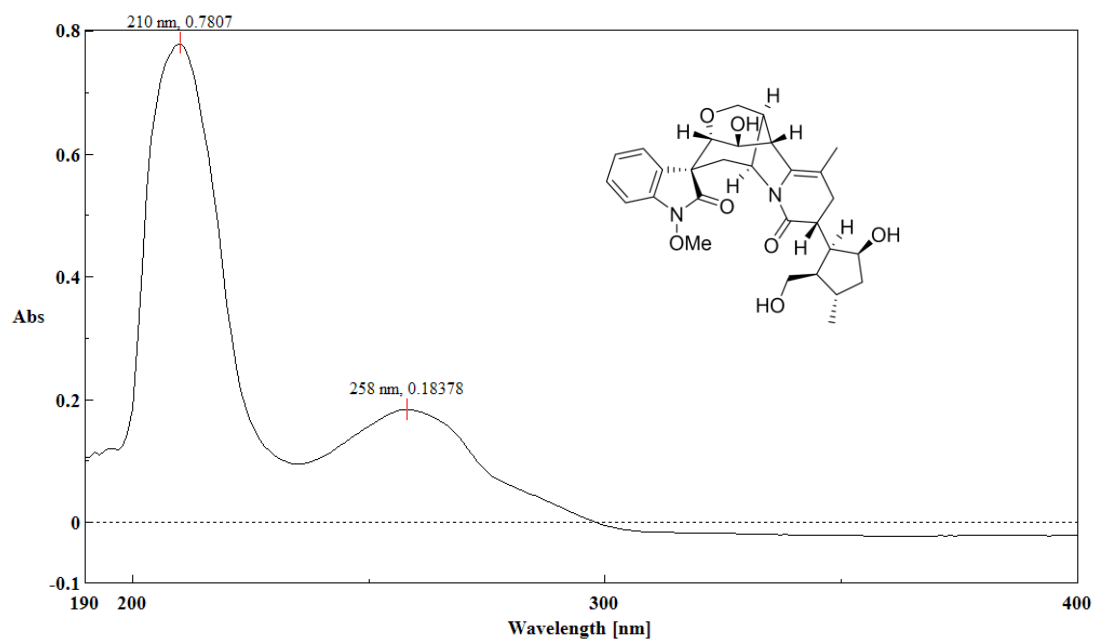

**Figure S14.** The UV of compound **2** in MeOH

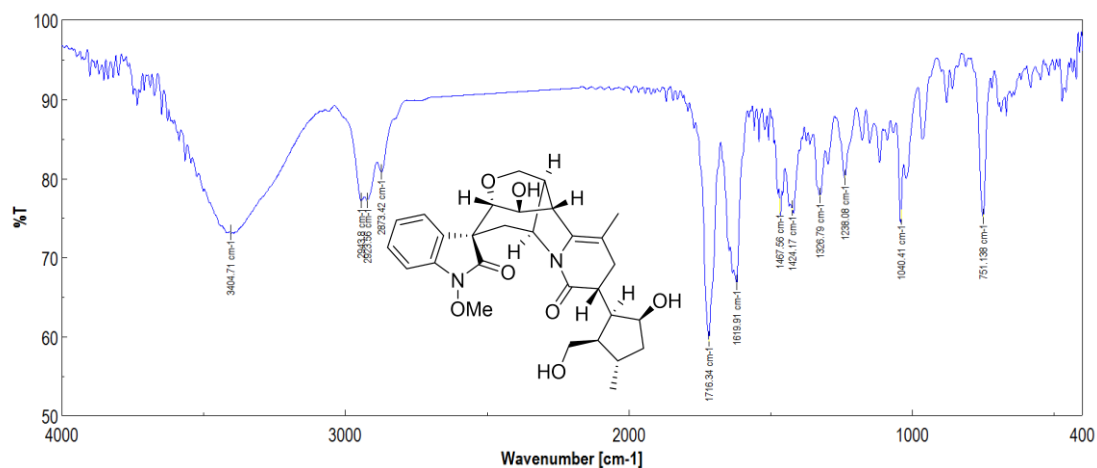

Figure S15. The IR (KBr disc) of compound 2

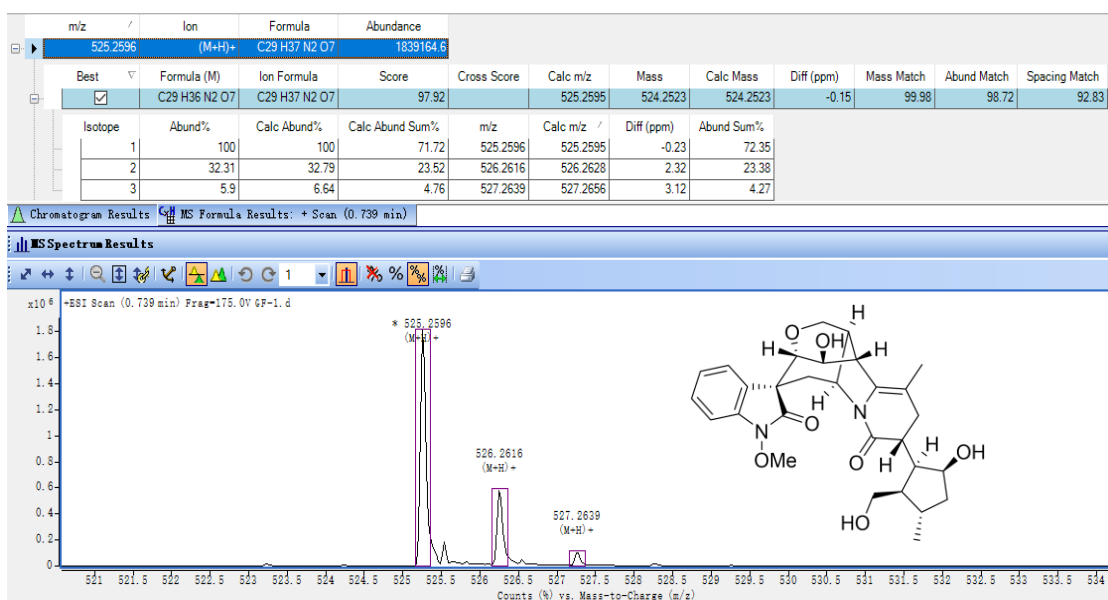

Figure S16. The HR-ESI-MS of compound 2

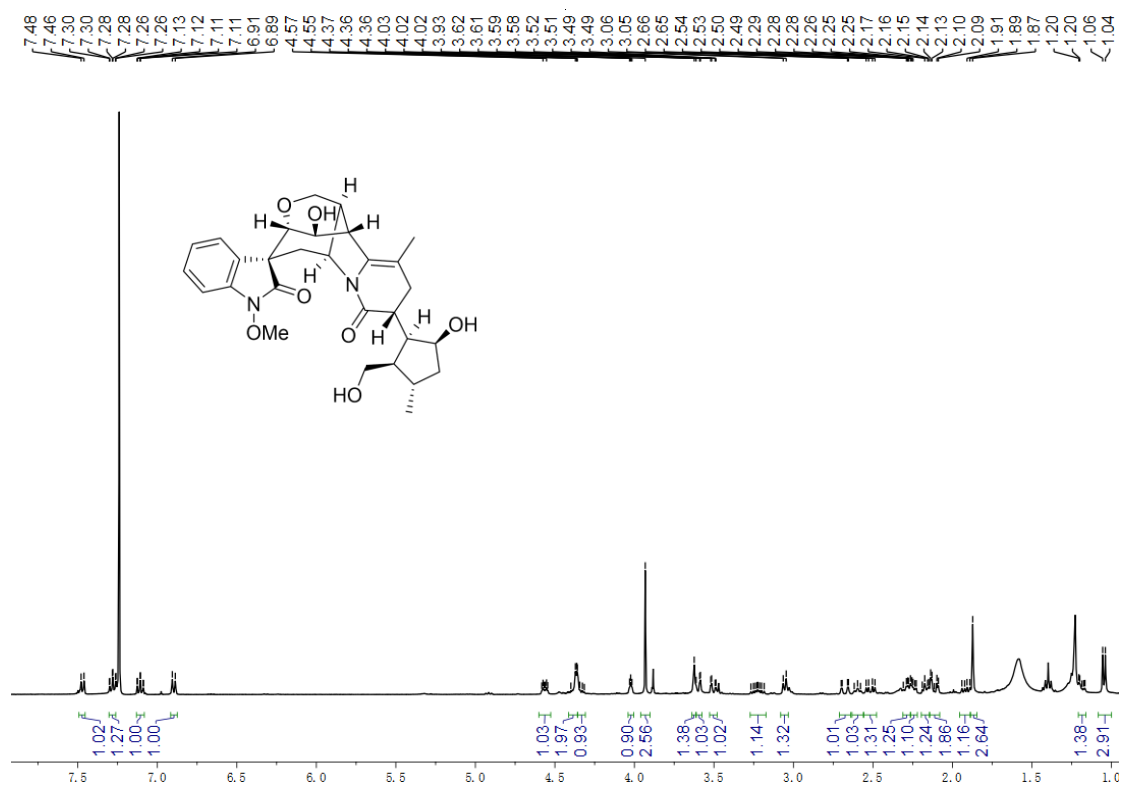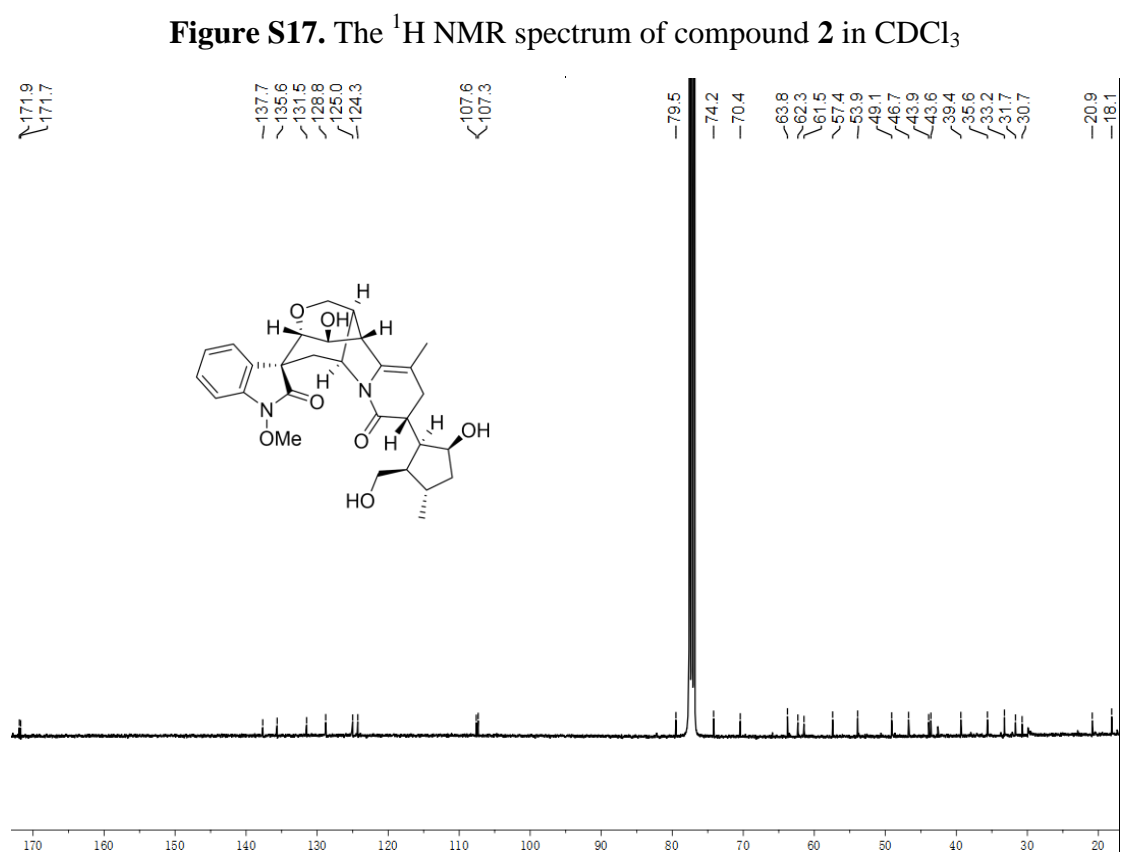



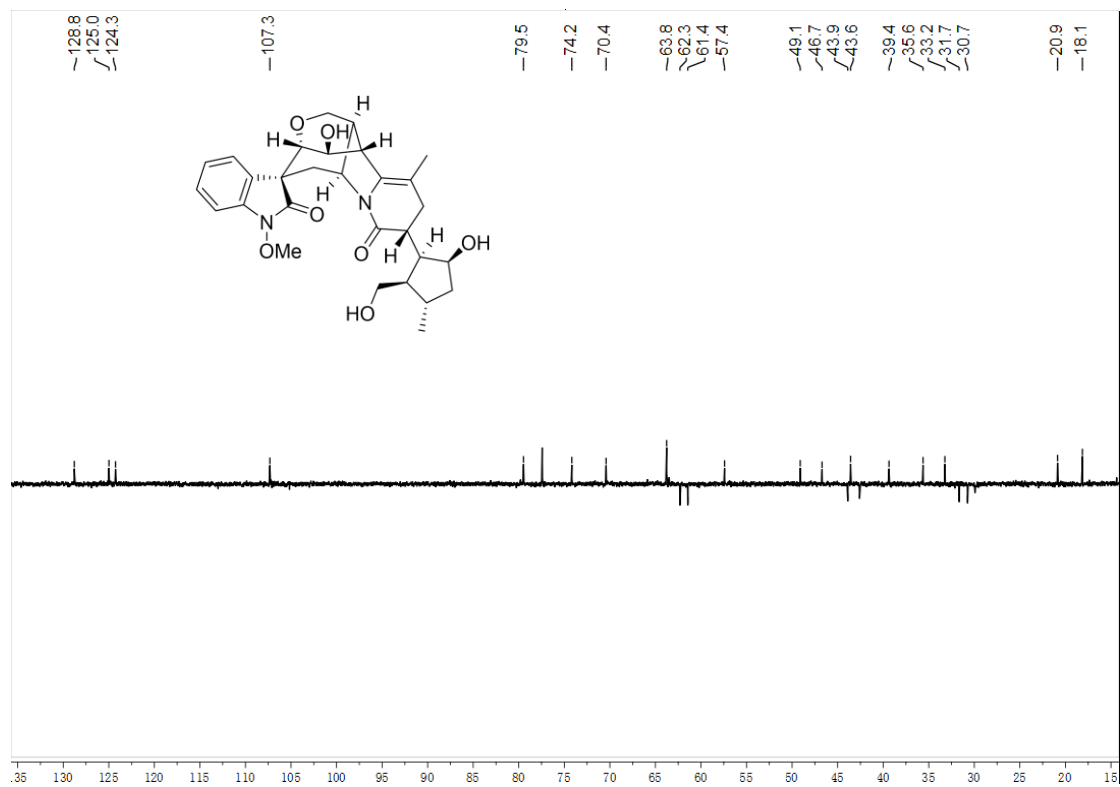

**Figure S19.** The DEPT-135 spectrum of compound **2** in  $\text{CDCl}_3$

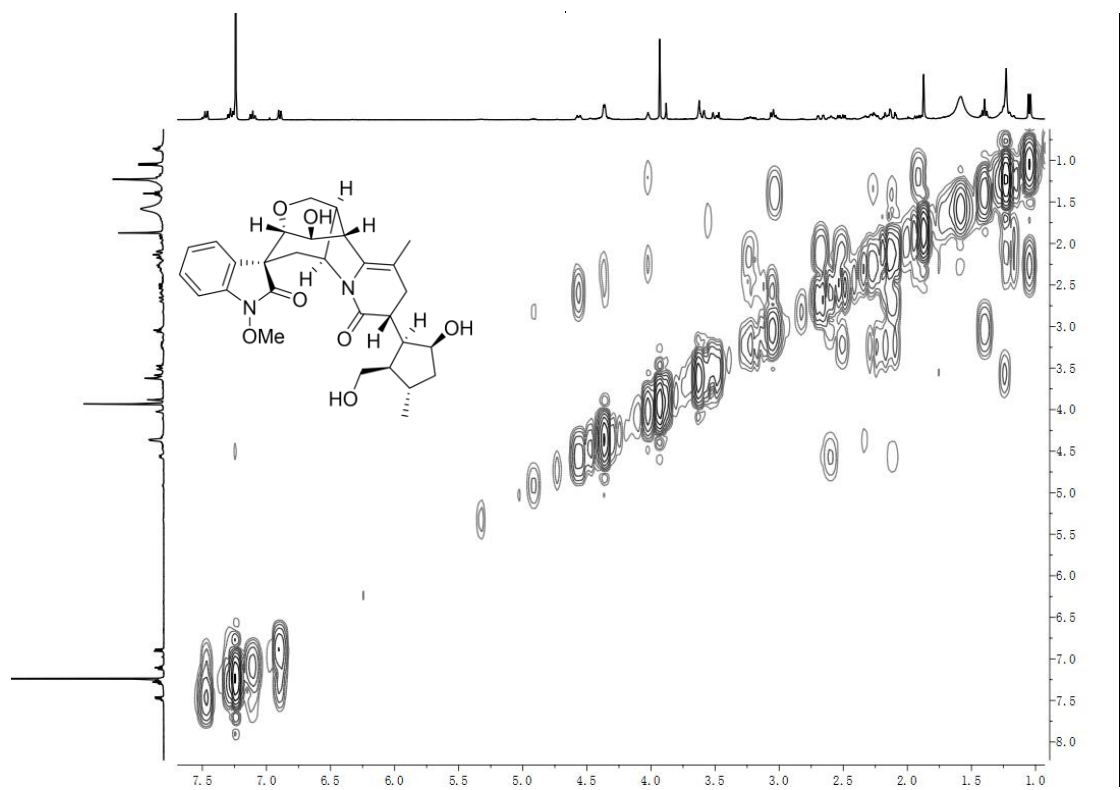

**Figure S20.** The  $^1\text{H}$ - $^1\text{H}$  COSY spectrum of compound **2** in  $\text{CDCl}_3$

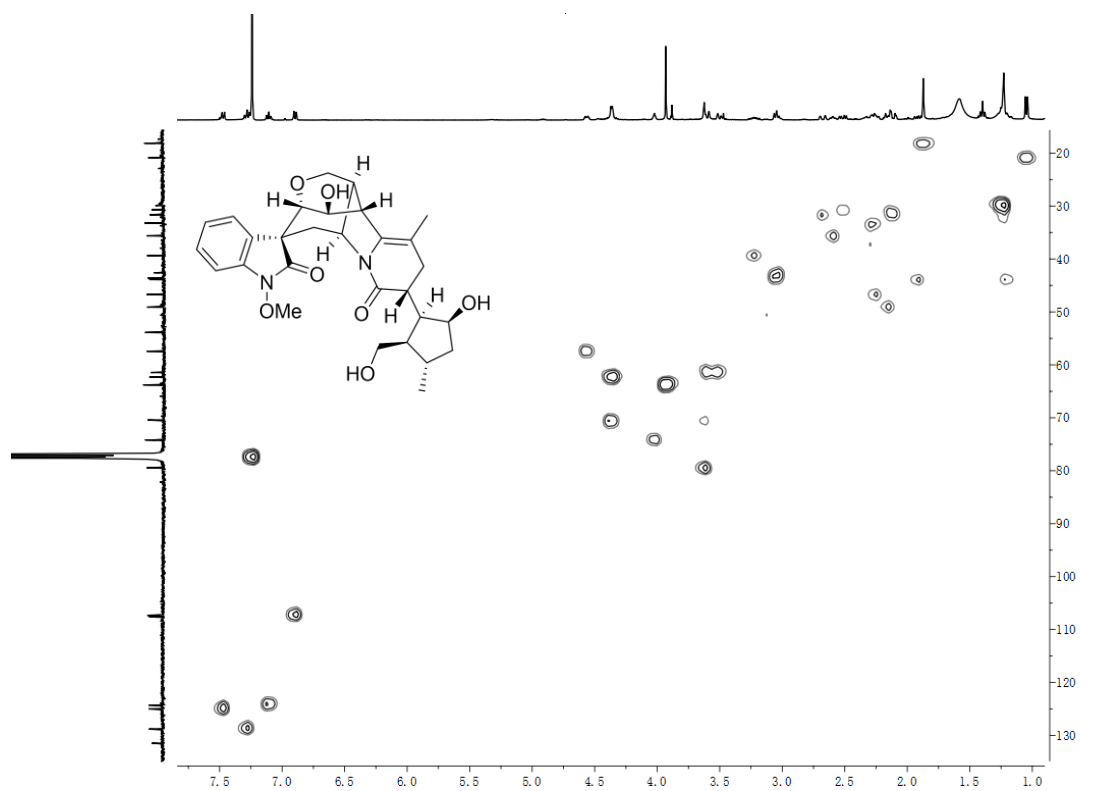

**Figure S21.** The HSQC spectrum of compound **2** in  $\text{CDCl}_3$

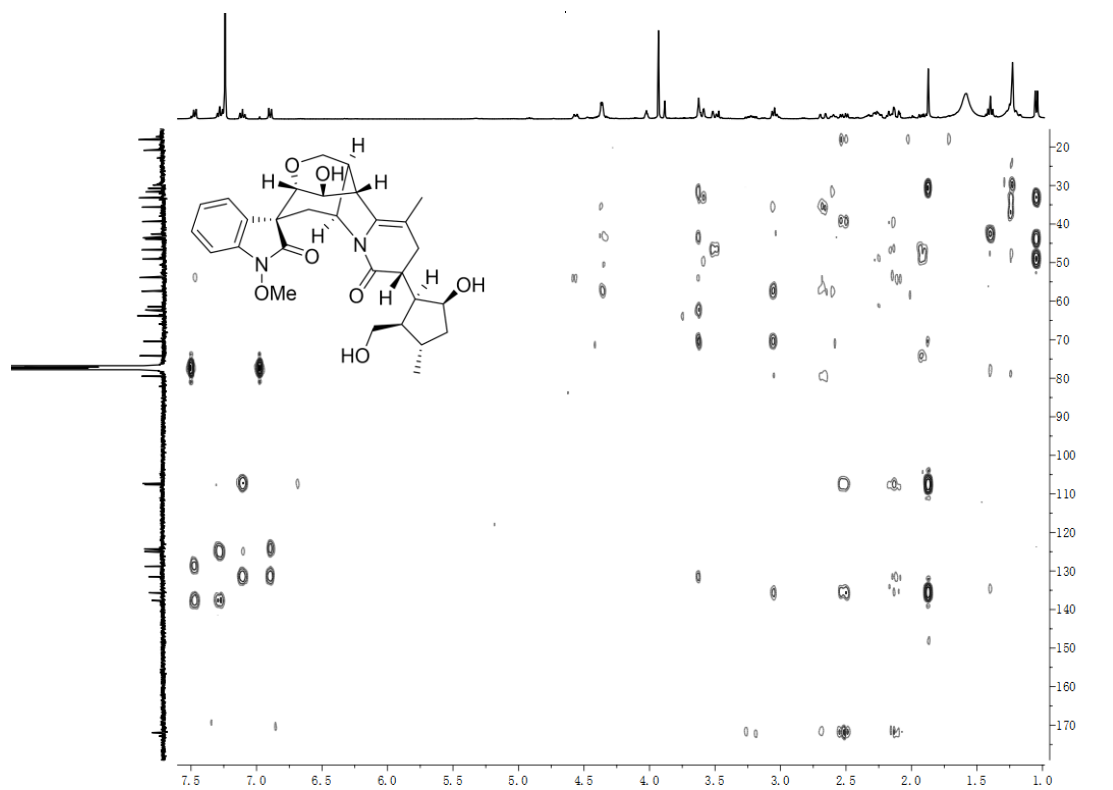

**Figure S22.** The HMBC spectrum of compound **2** in  $\text{CDCl}_3$

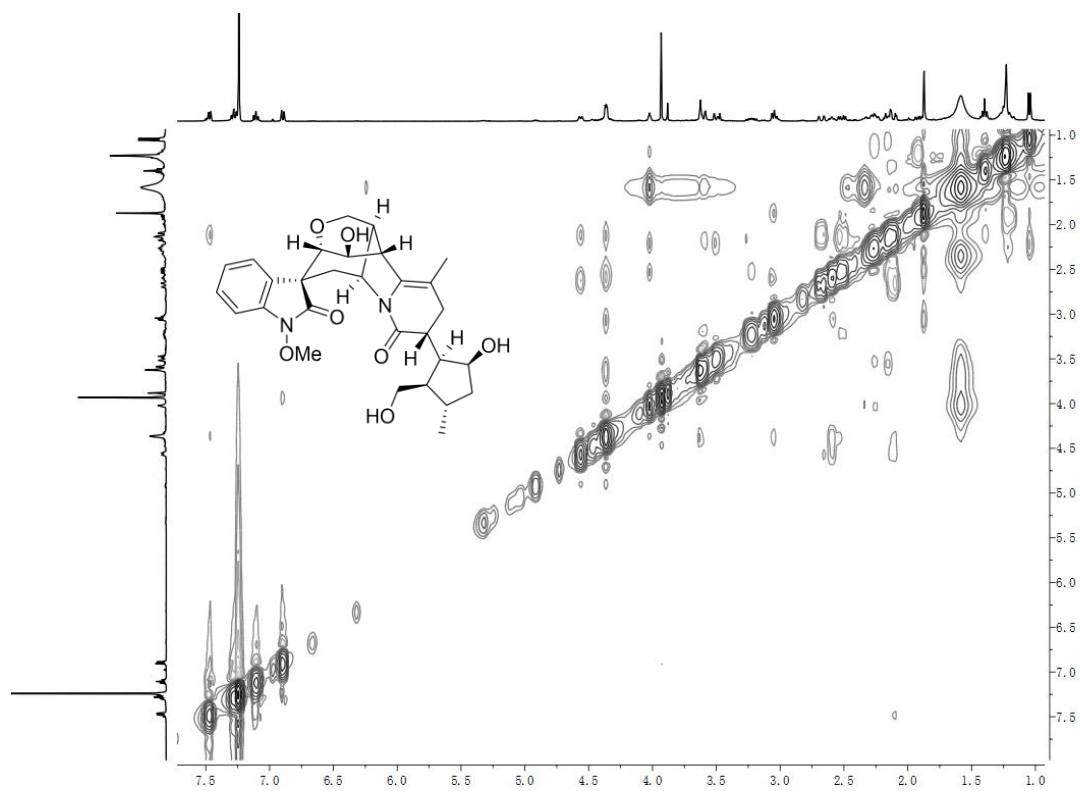

**Figure S23.** The NOESY spectrum of compound **2** in  $\text{CDCl}_3$

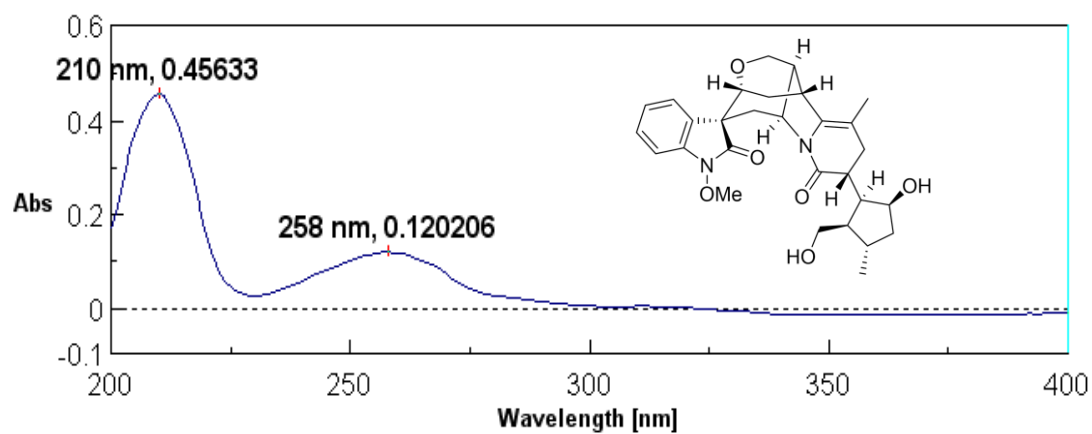

**Figure S24.** The UV of compound **3** in MeOH

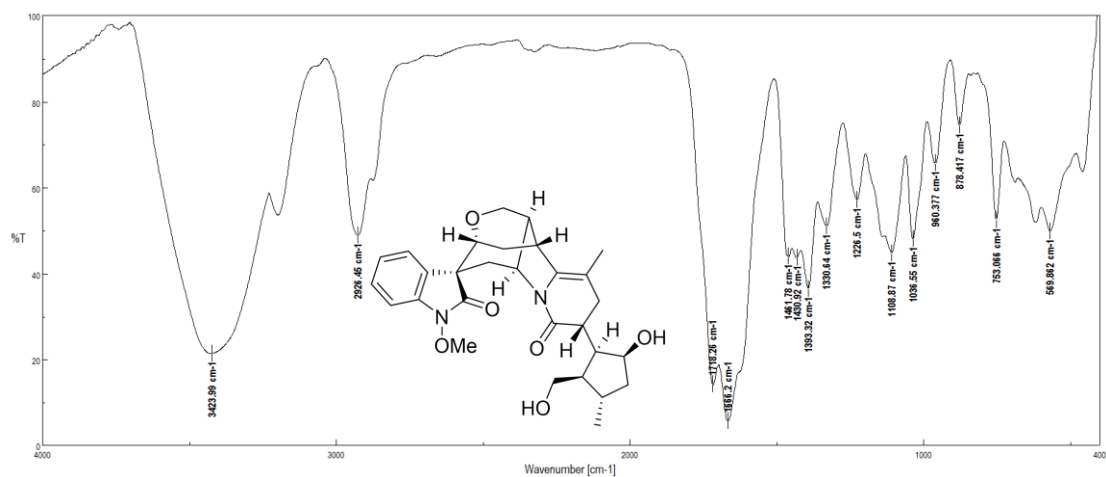

**Figure S25.** The IR (KBr disc) of compound **3**

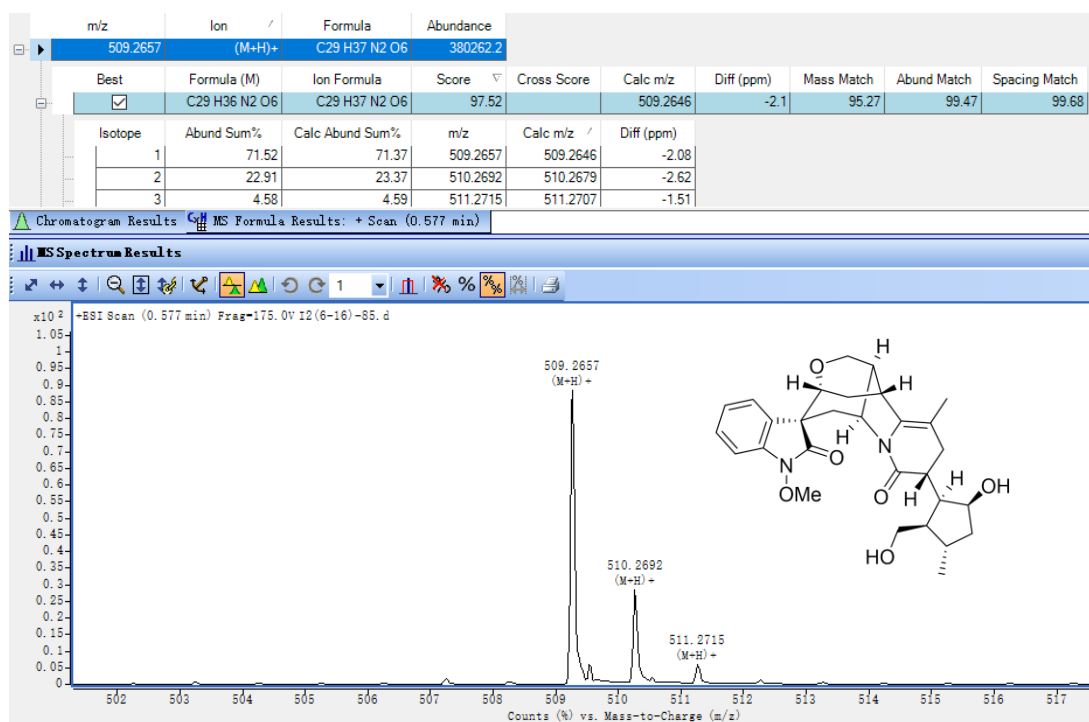

**Figure S26.** The HR-ESI-MS of compound **3**

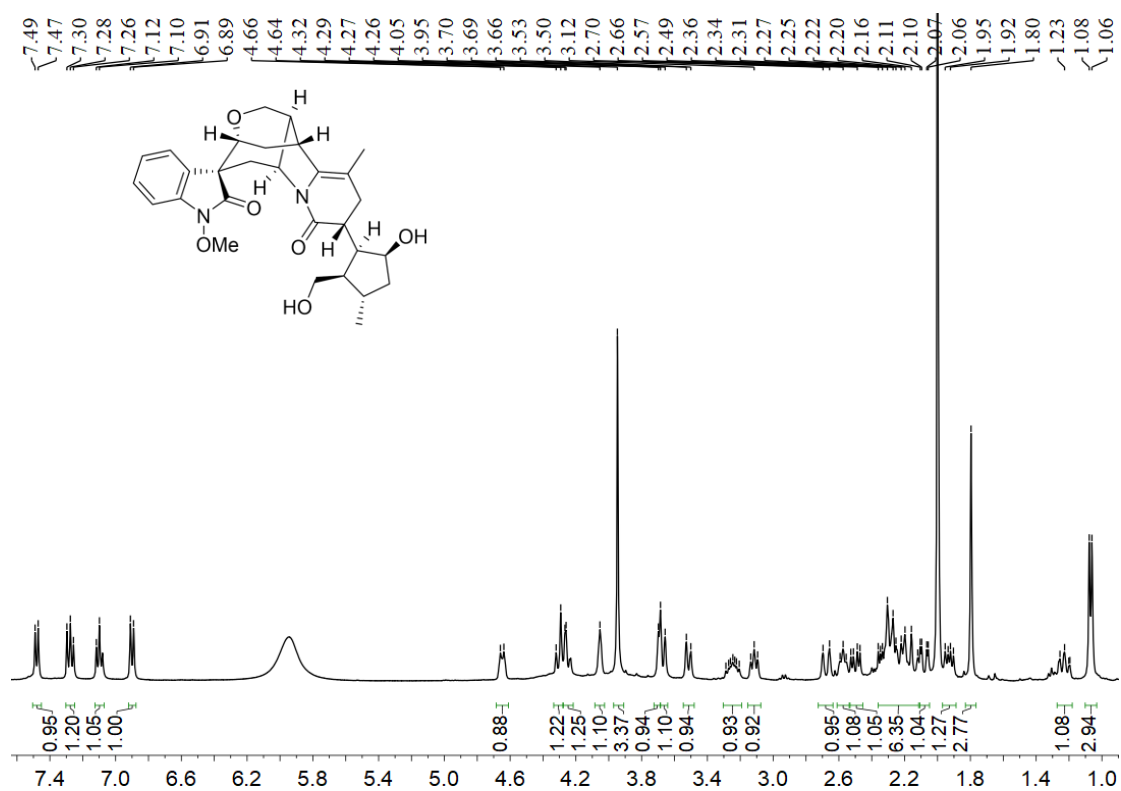

**Figure S27.** The  $^1\text{H}$  NMR spectrum of compound **3** in  $\text{CDCl}_3$

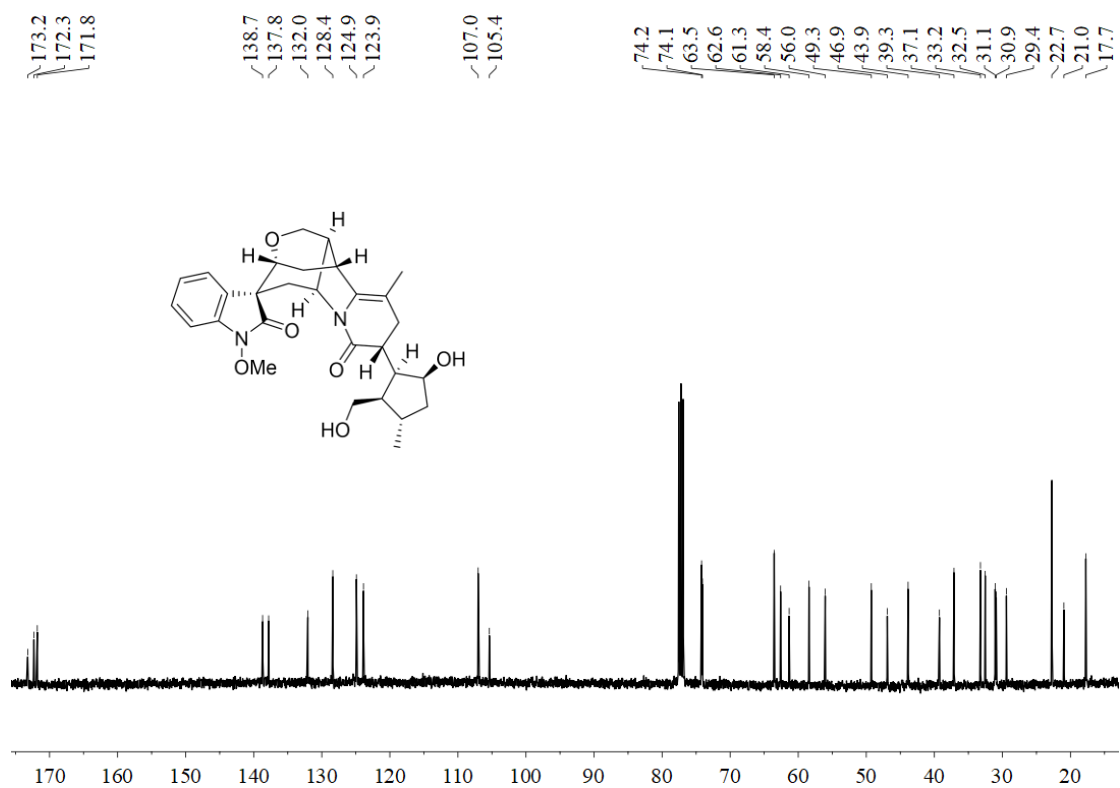

**Figure S28.** The  $^{13}\text{C}$  NMR spectrum of compound **3** in  $\text{CDCl}_3$

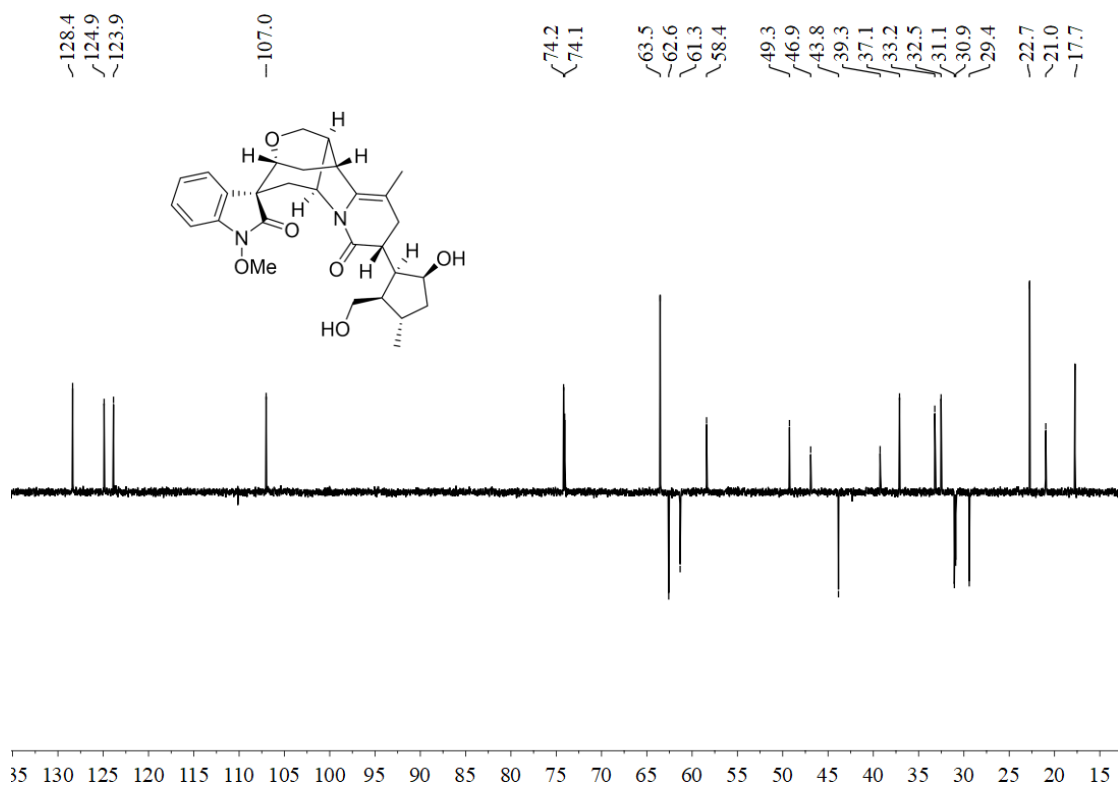

**Figure S29.** The DEPT-135 spectrum of compound **3** in  $\text{CDCl}_3$

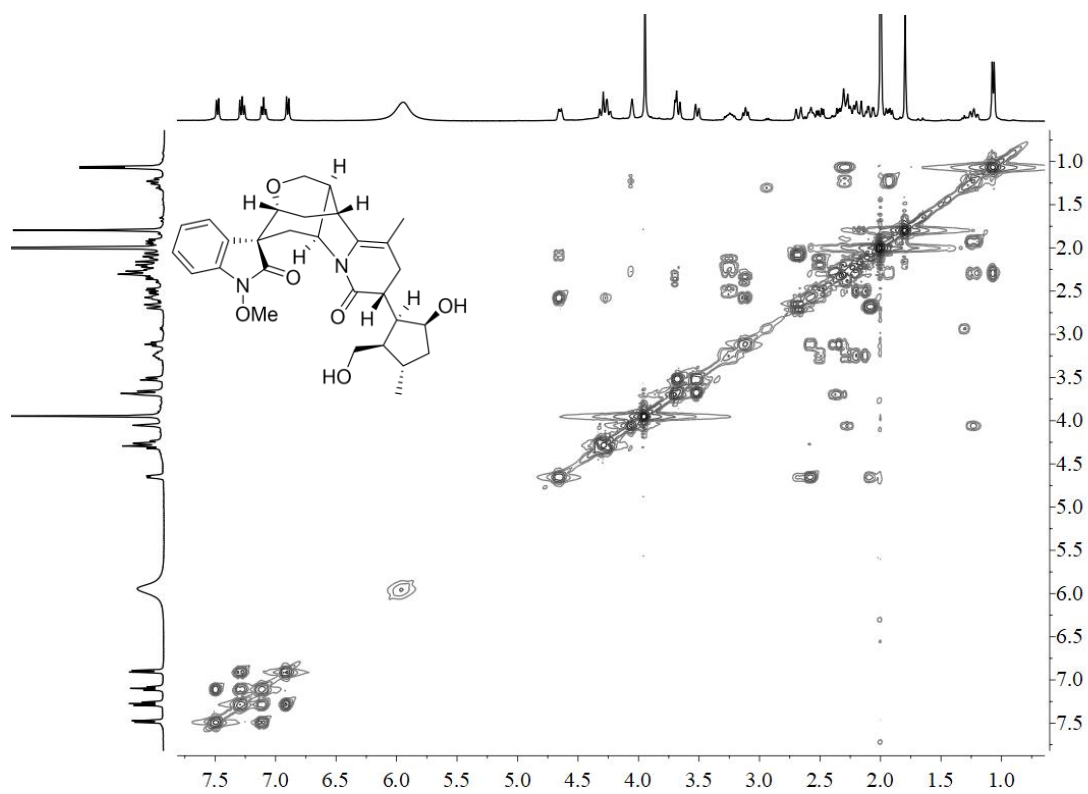

**Figure S30.** The  $^1\text{H}$ - $^1\text{H}$  COSY spectrum of compound **3** in  $\text{CDCl}_3$

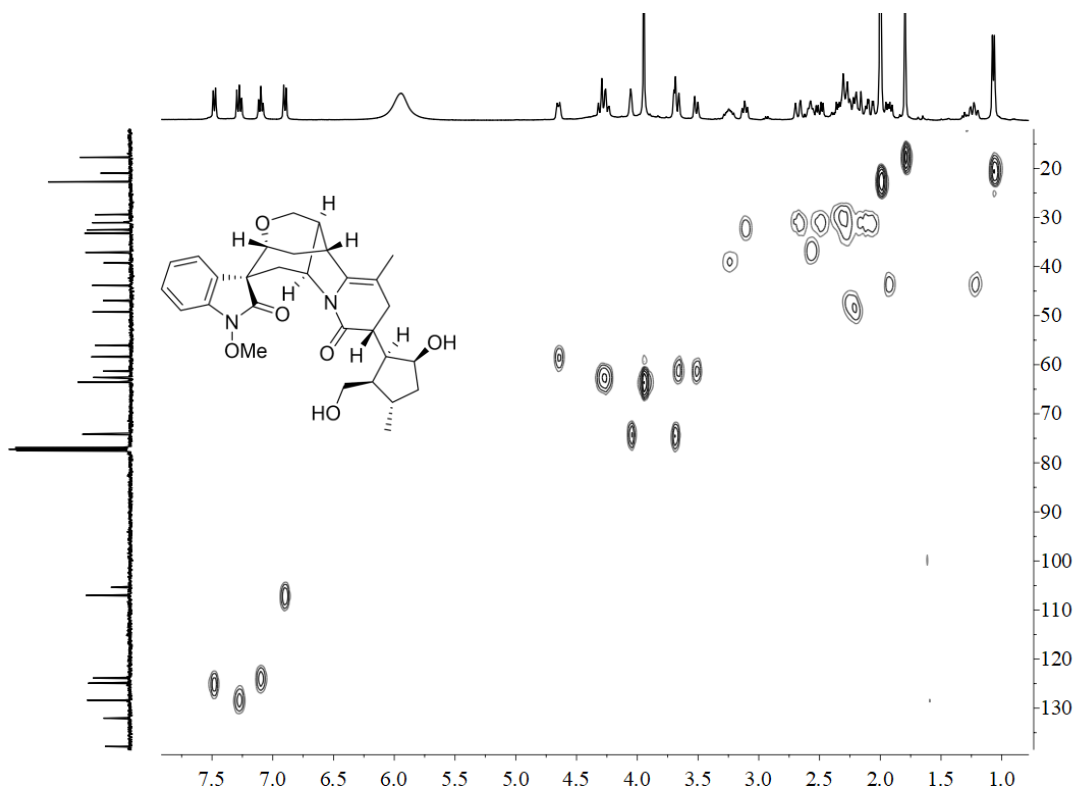

**Figure S31.** The HSQC spectrum of compound **3** in  $\text{CDCl}_3$

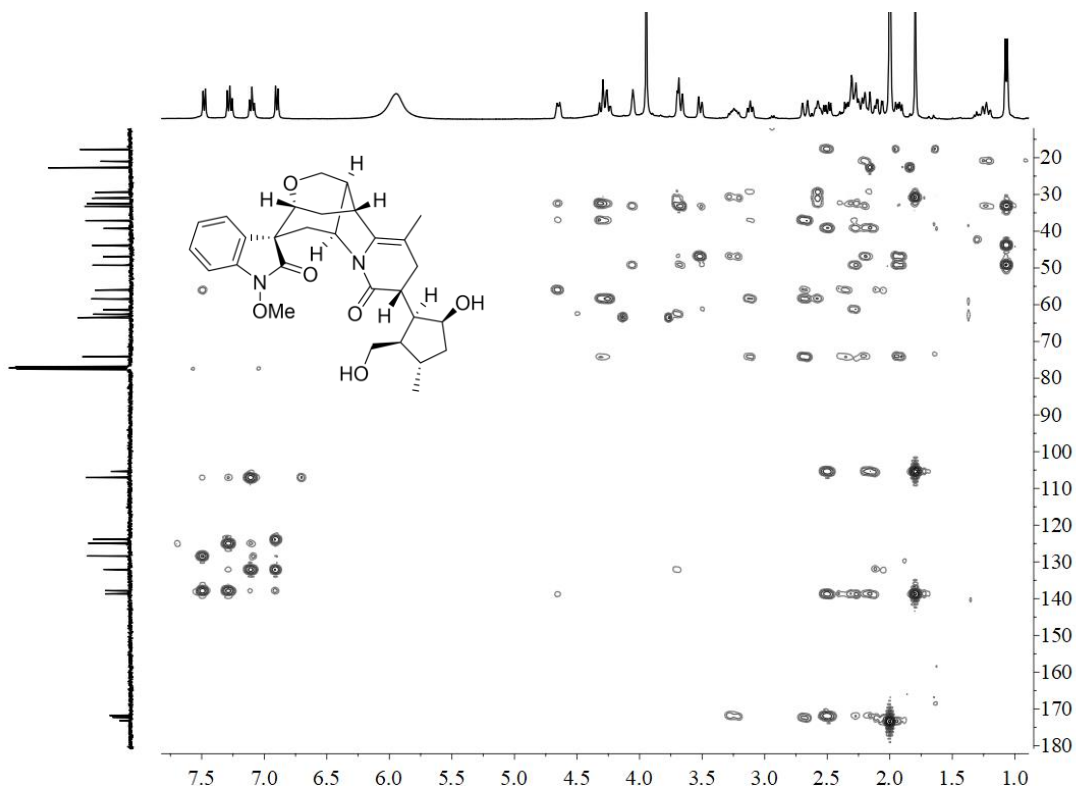

**Figure S32.** The HMBC spectrum of compound **3** in  $\text{CDCl}_3$

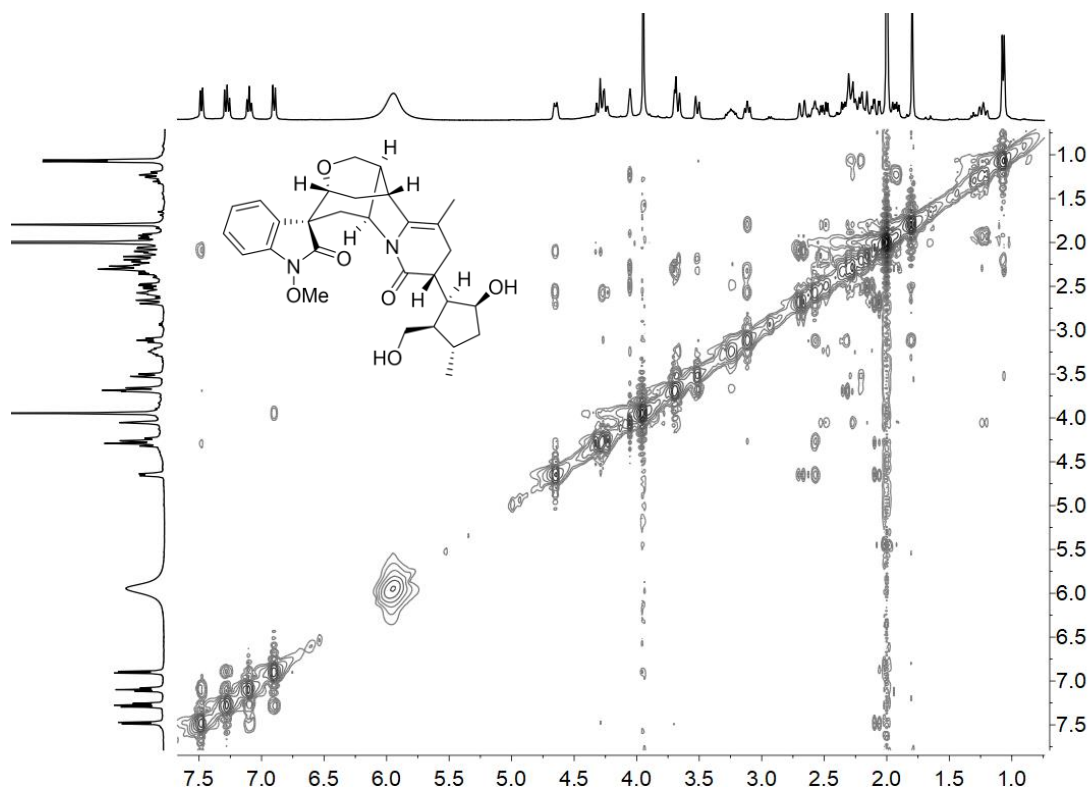

**Figure S33.** The NOESY spectrum of compound **3** in  $\text{CDCl}_3$

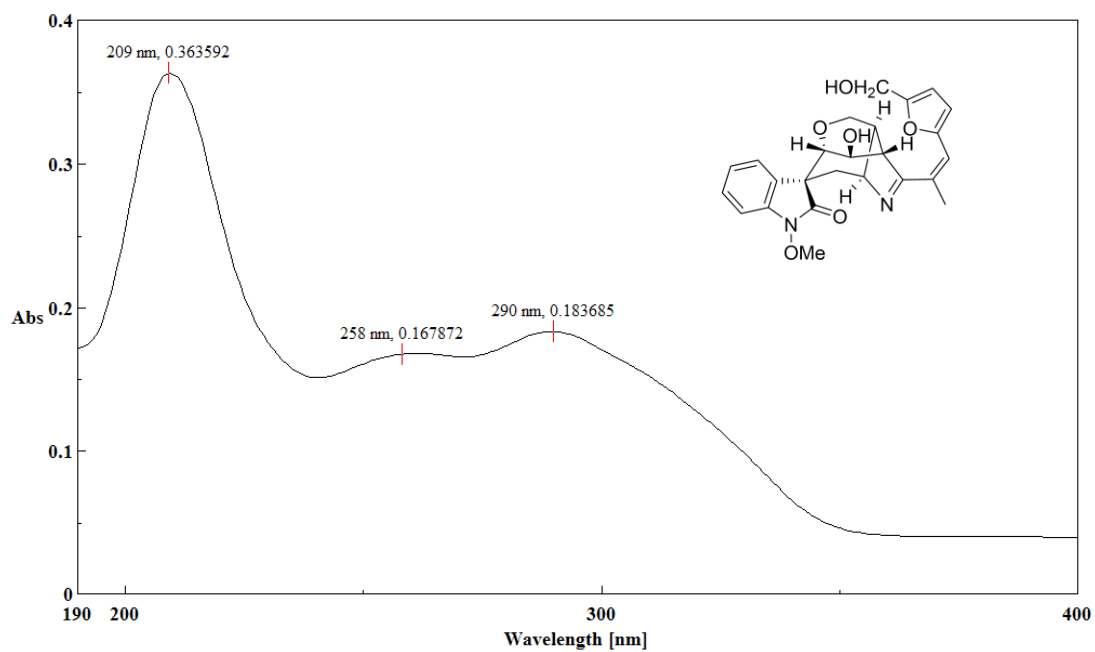

**Figure S34.** The UV of compound **4** in MeOH



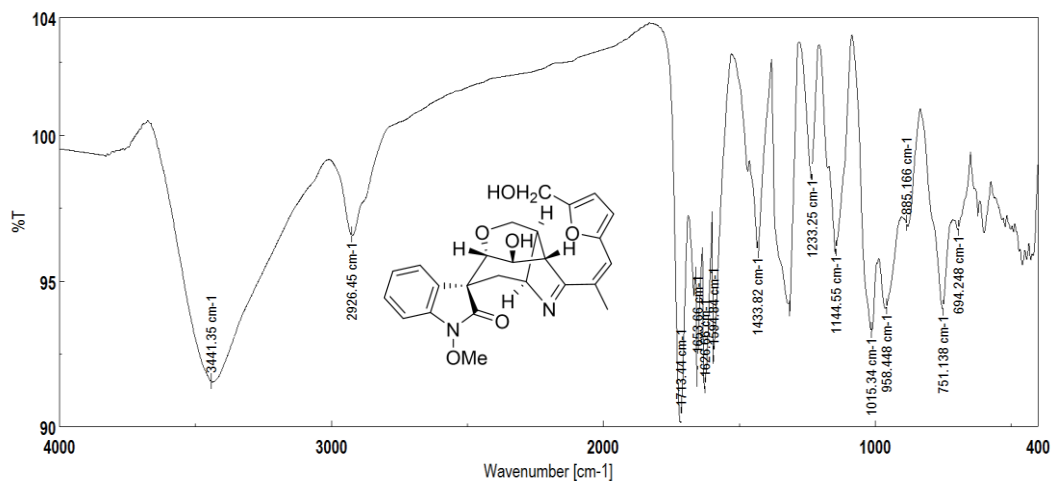

Figure S35. The IR (KBr disc) of compound 4

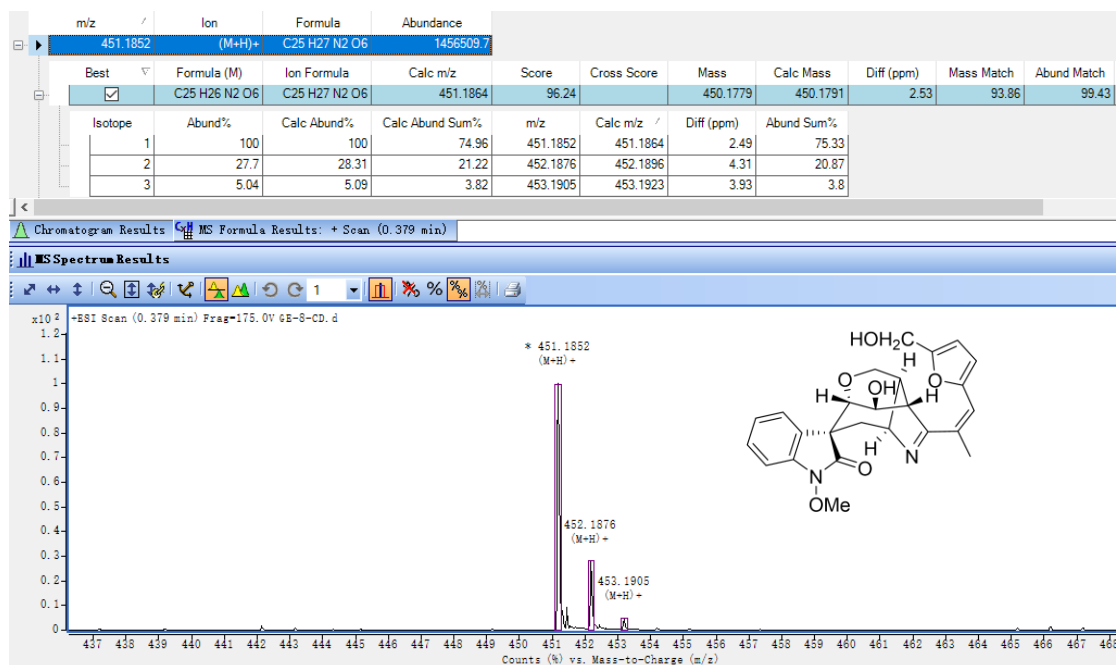

Figure S36. The HR-ESI-MS of compound 4

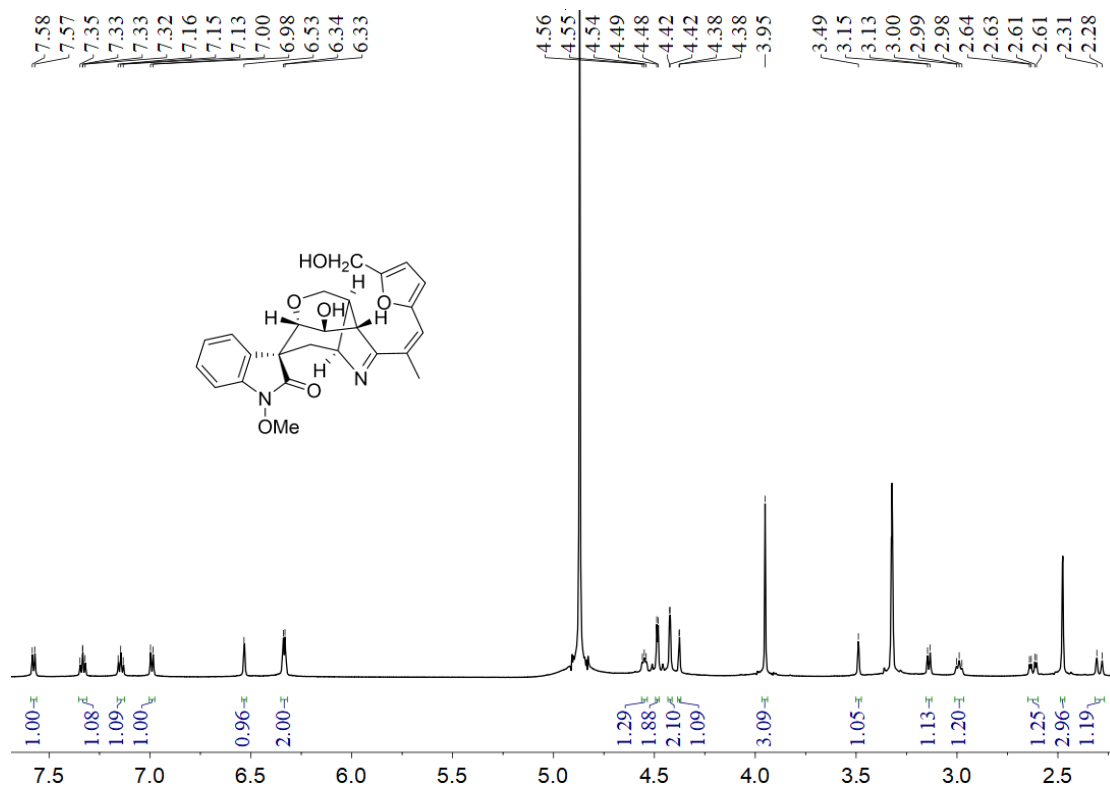

**Figure S37.** The  $^1\text{H}$  NMR spectrum of compound **4** in  $\text{CD}_3\text{OD}$

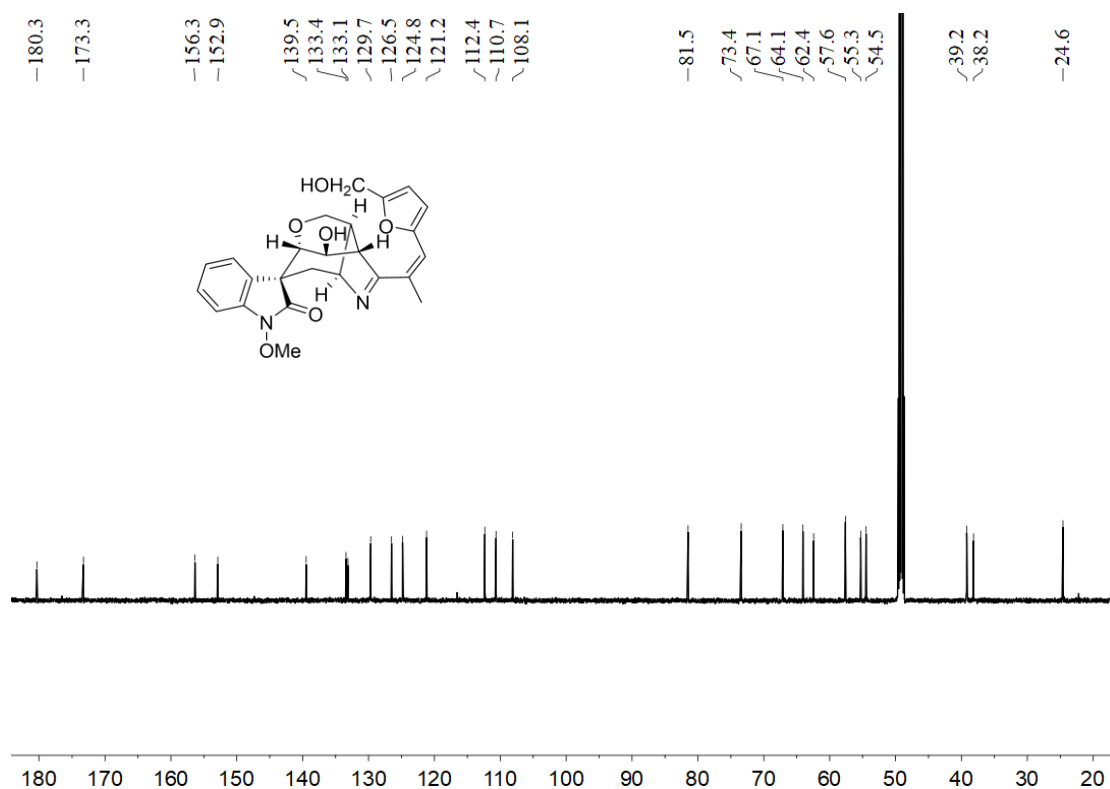

**Figure S38.** The  $^{13}\text{C}$  NMR spectrum of compound **4** in  $\text{CD}_3\text{OD}$

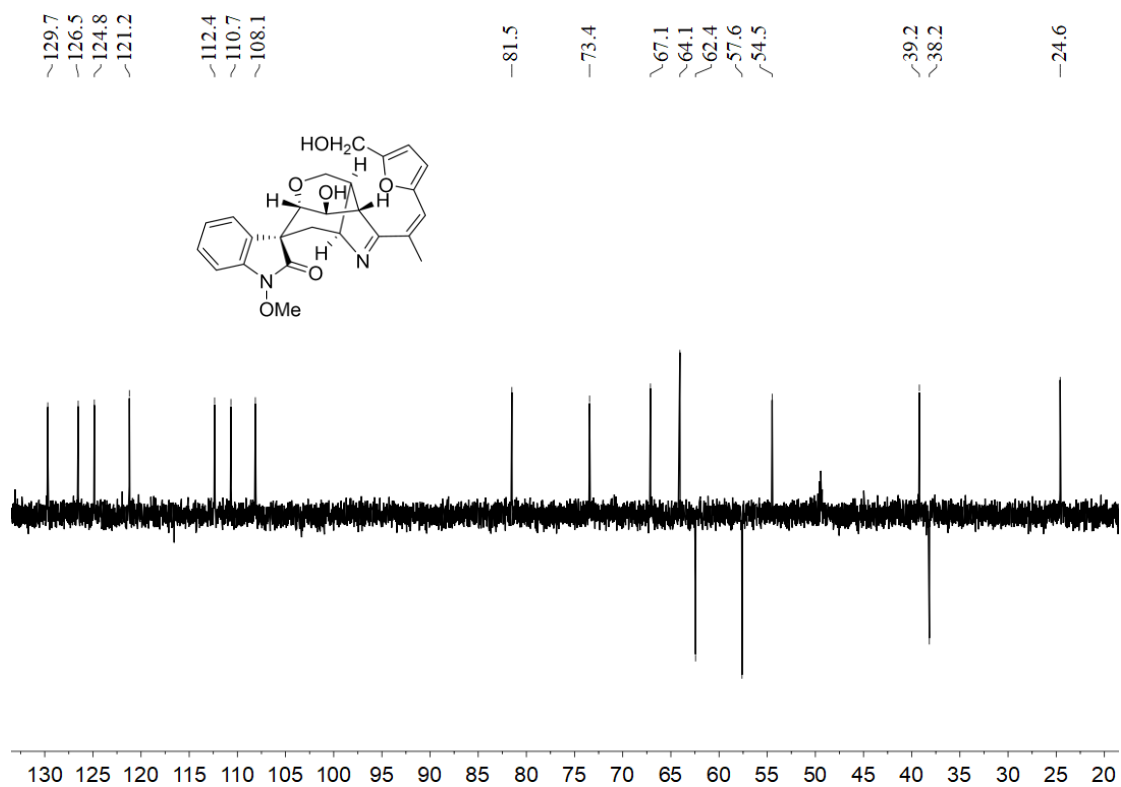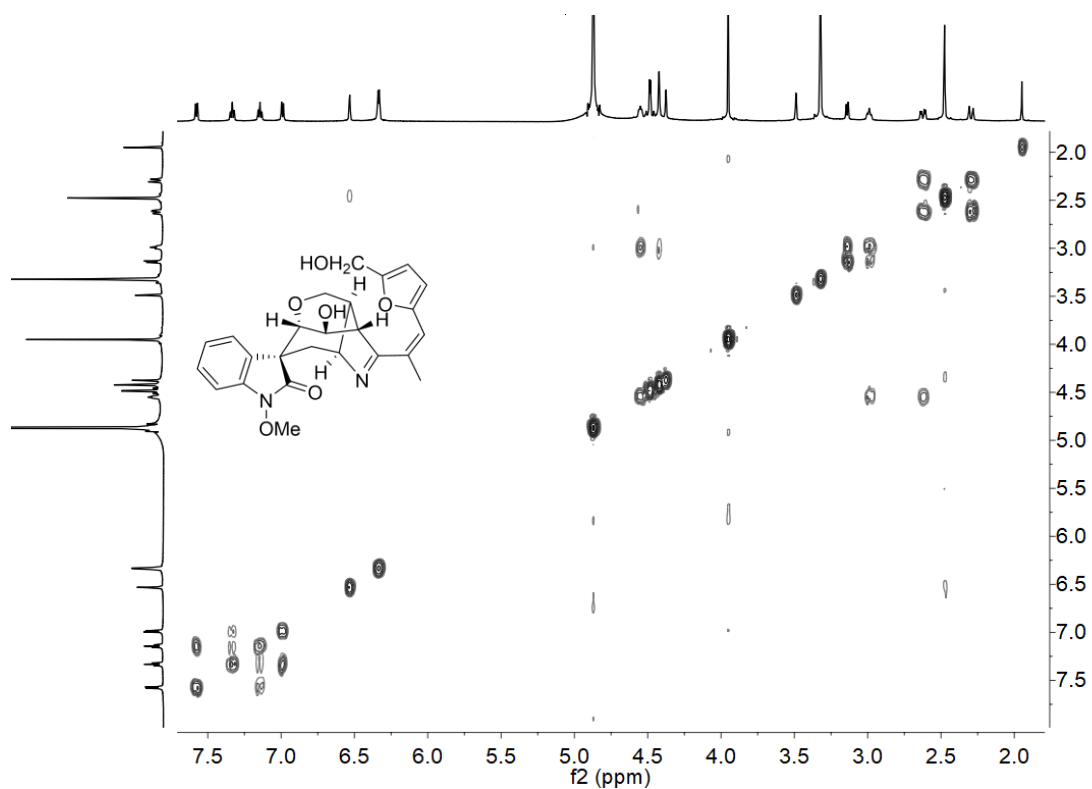

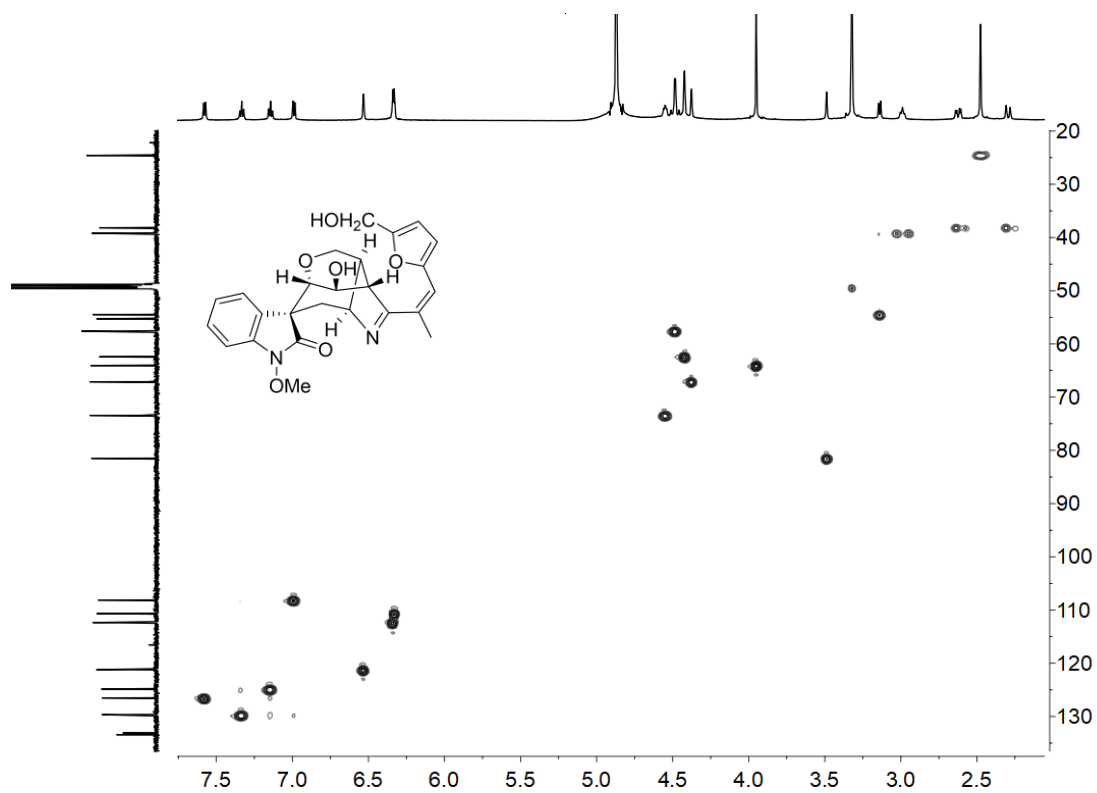

**Figure S41.** The HSQC spectrum of compound **4** in  $\text{CD}_3\text{OD}$

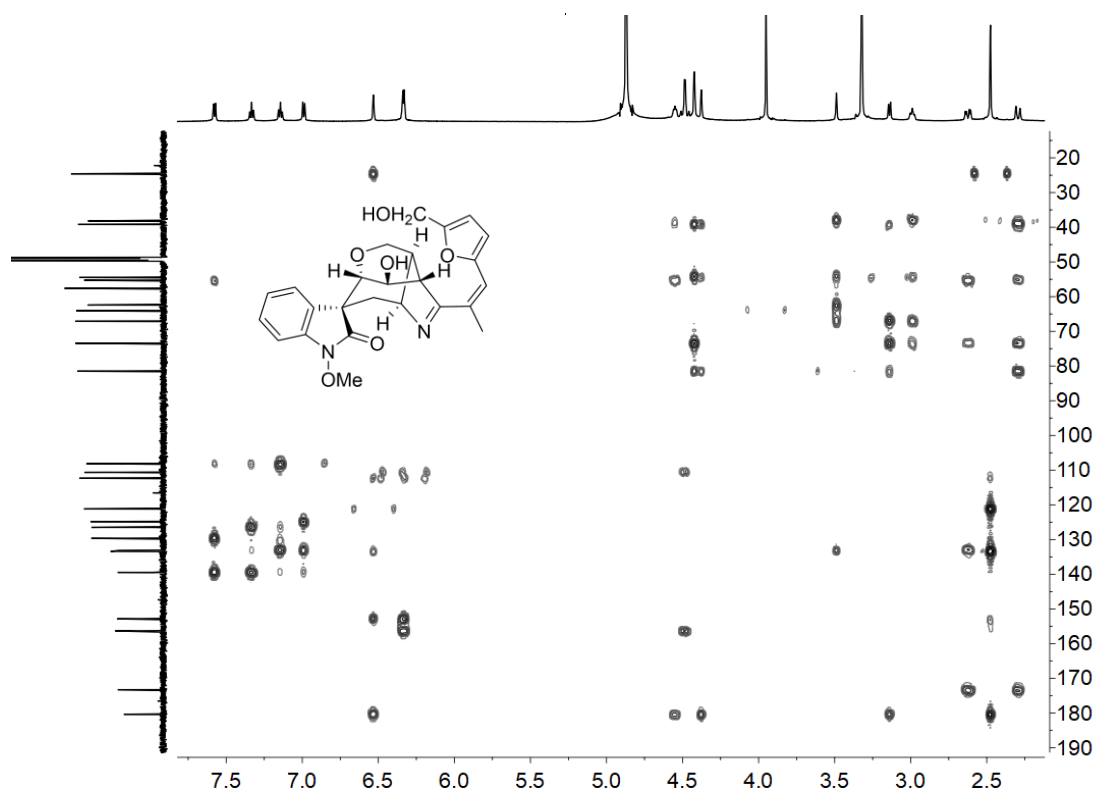

**Figure S42.** The HMBC spectrum of compound **4** in  $\text{CD}_3\text{OD}$

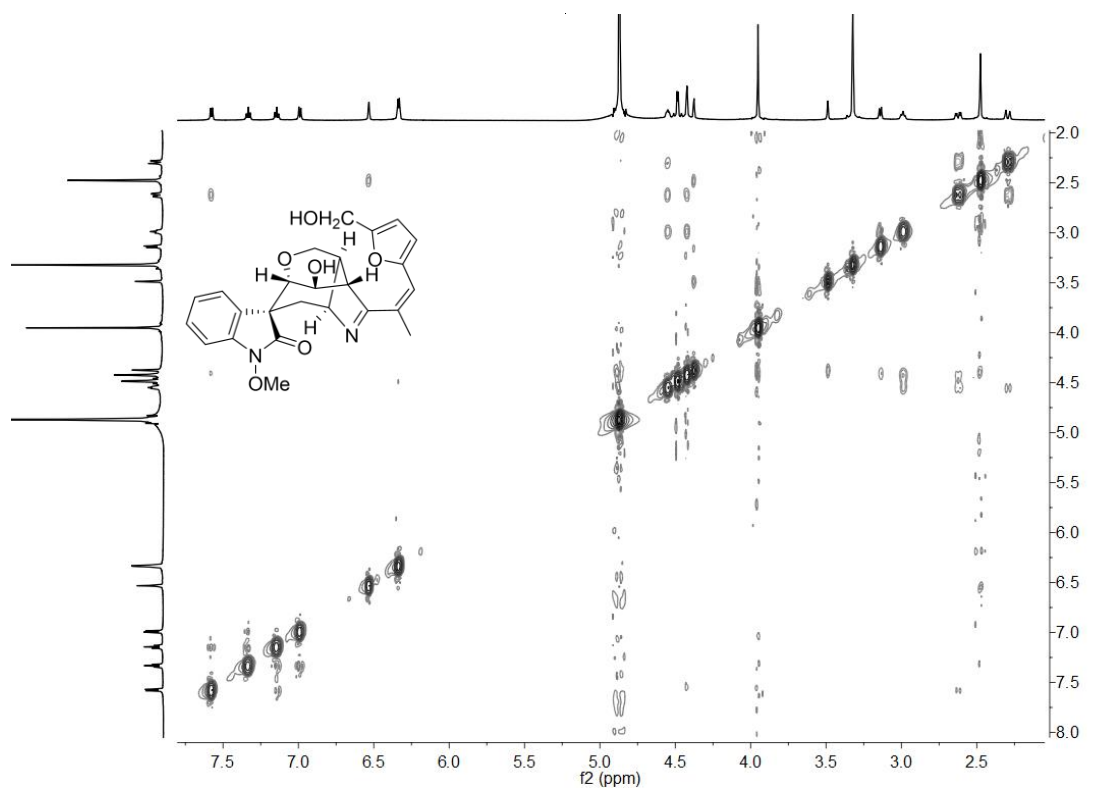

**Figure S43.** The NOESY spectrum of compound **4** in CD<sub>3</sub>OD

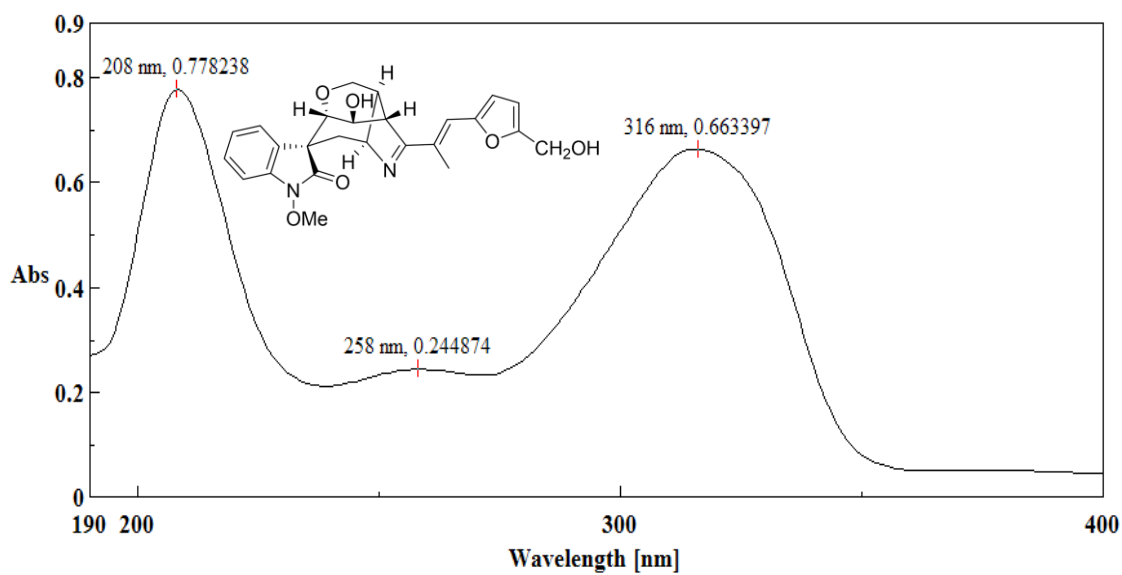

**Figure S44.** The UV of compound **5** in MeOH

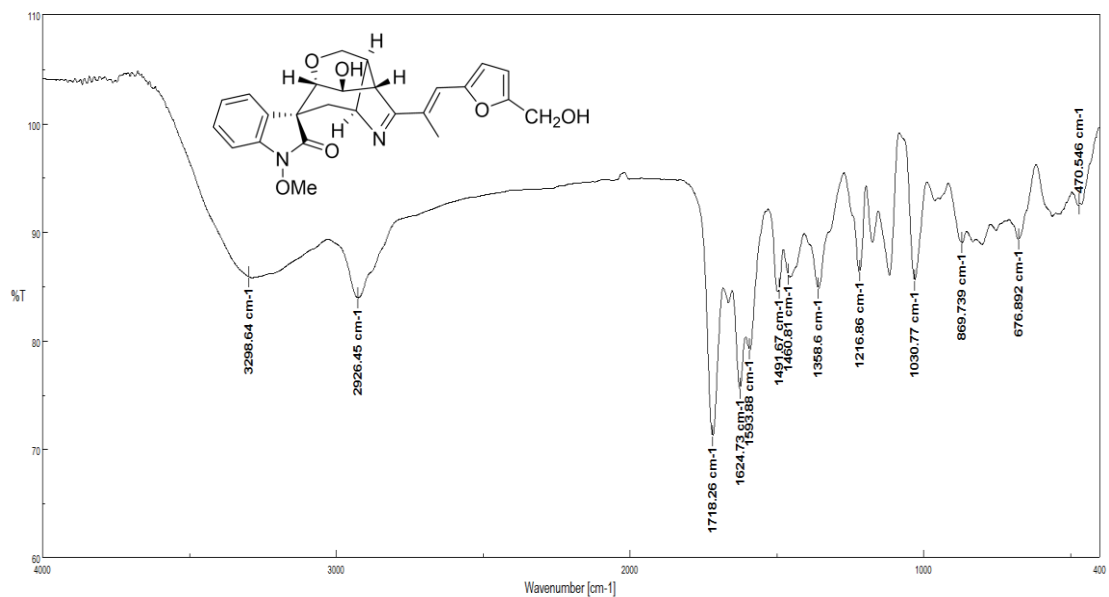

Figure S45. The IR (KBr disc) of compound 5

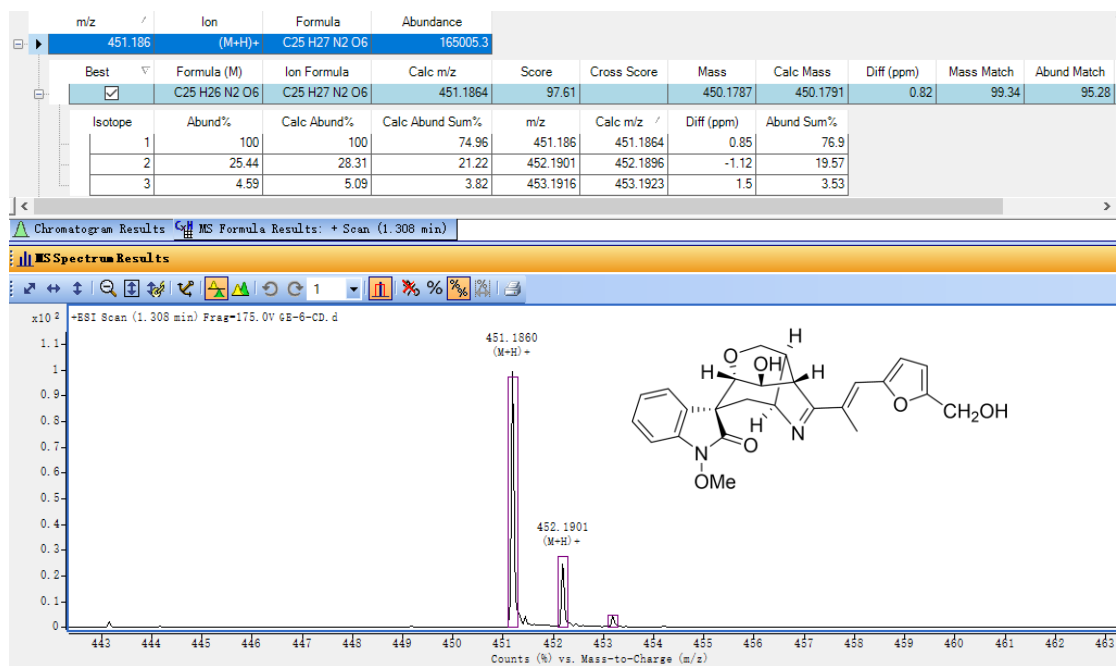

Figure S46. The HR-ESI-MS of compound 5

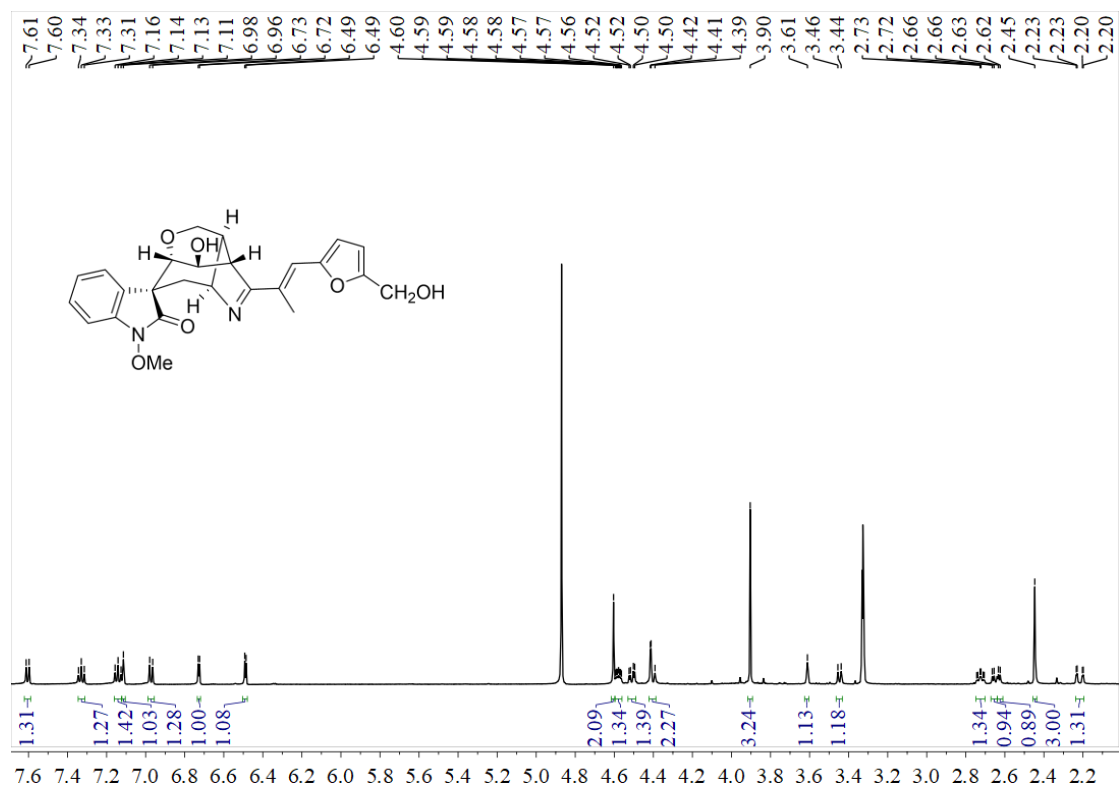

**Figure S47.** The  $^1\text{H}$  NMR spectrum of compound **5** in  $\text{CD}_3\text{OD}$

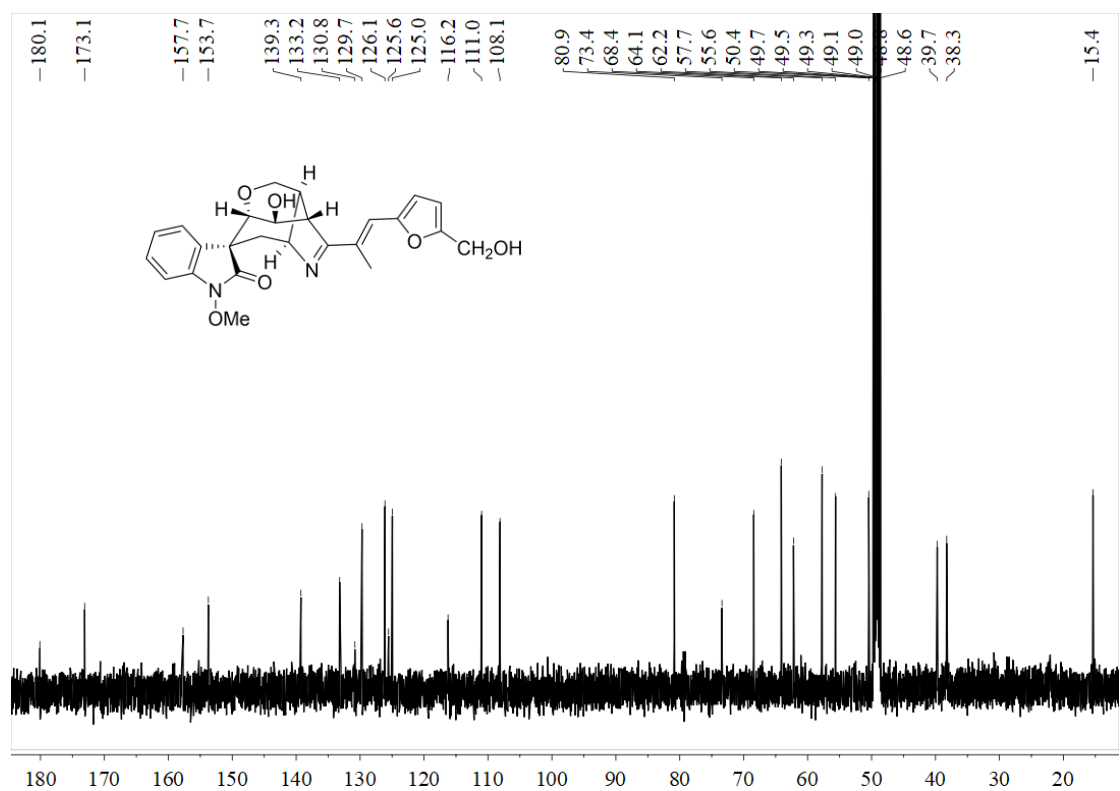

**Figure S48.** The  $^{13}\text{C}$  NMR spectrum of compound **5** in  $\text{CD}_3\text{OD}$

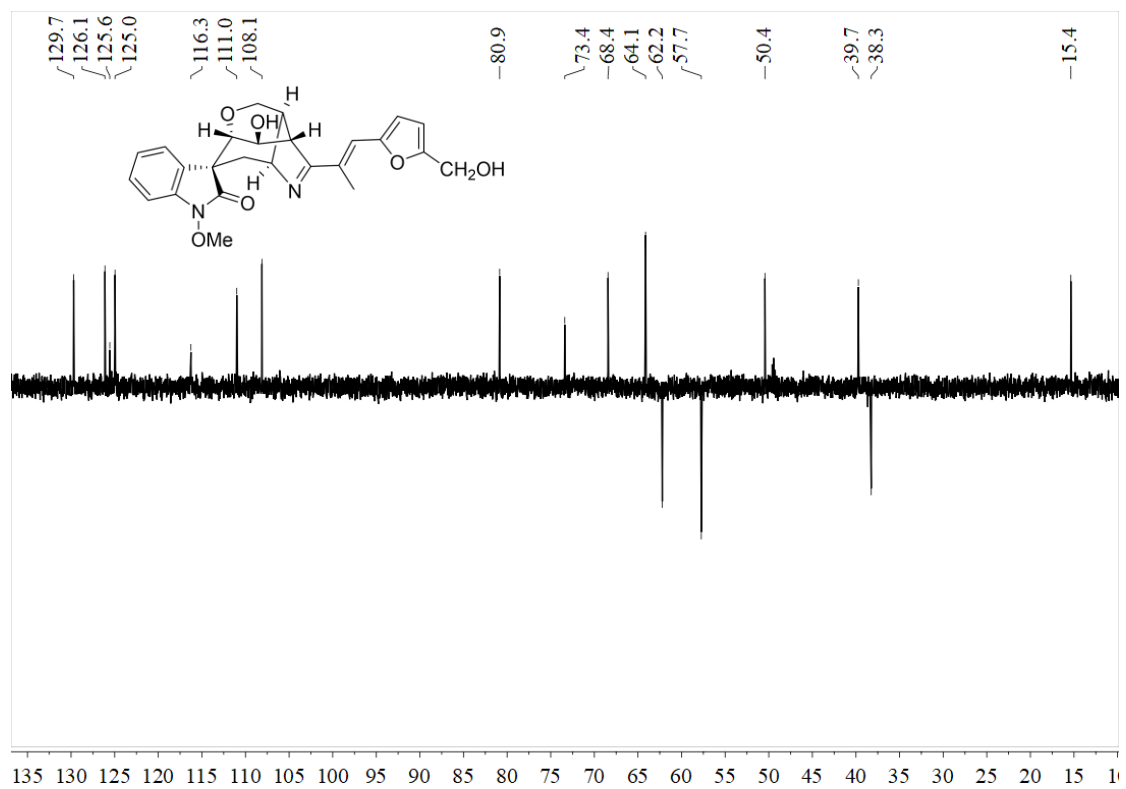

**Figure S49.** The DEPT-135 spectrum of compound **5** in CD<sub>3</sub>OD

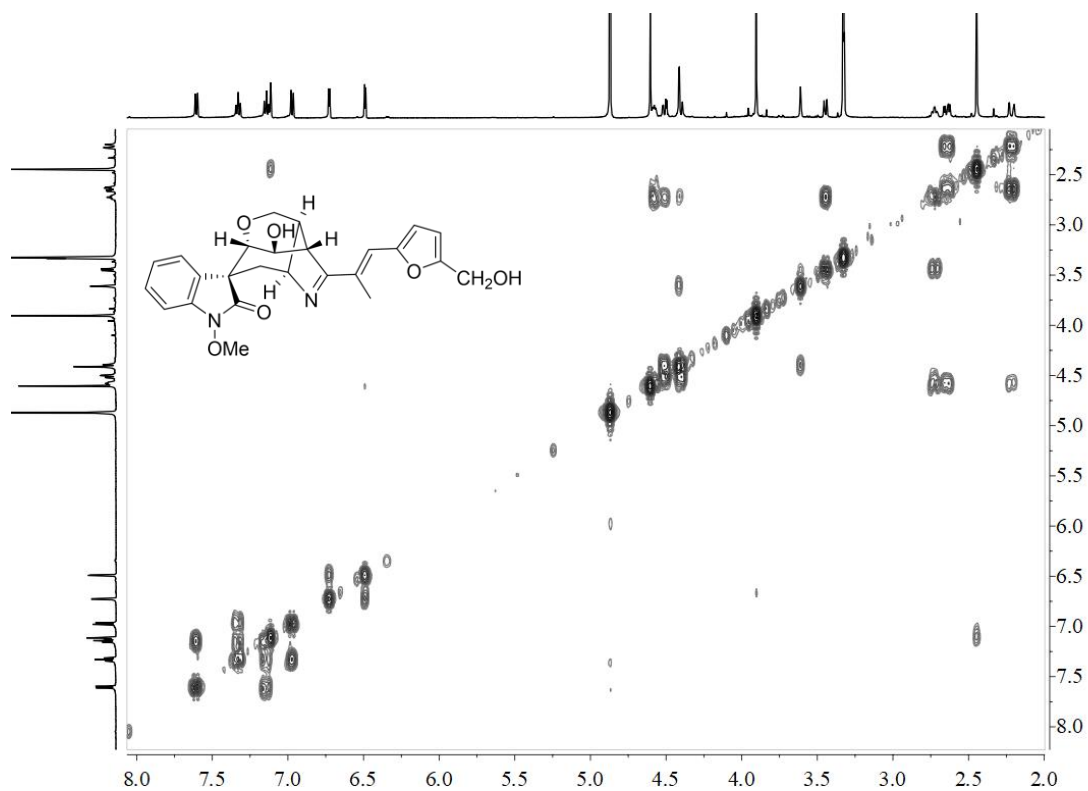

**Figure S50.** The <sup>1</sup>H-<sup>1</sup>H COSY spectrum of compound **5** in CD<sub>3</sub>OD



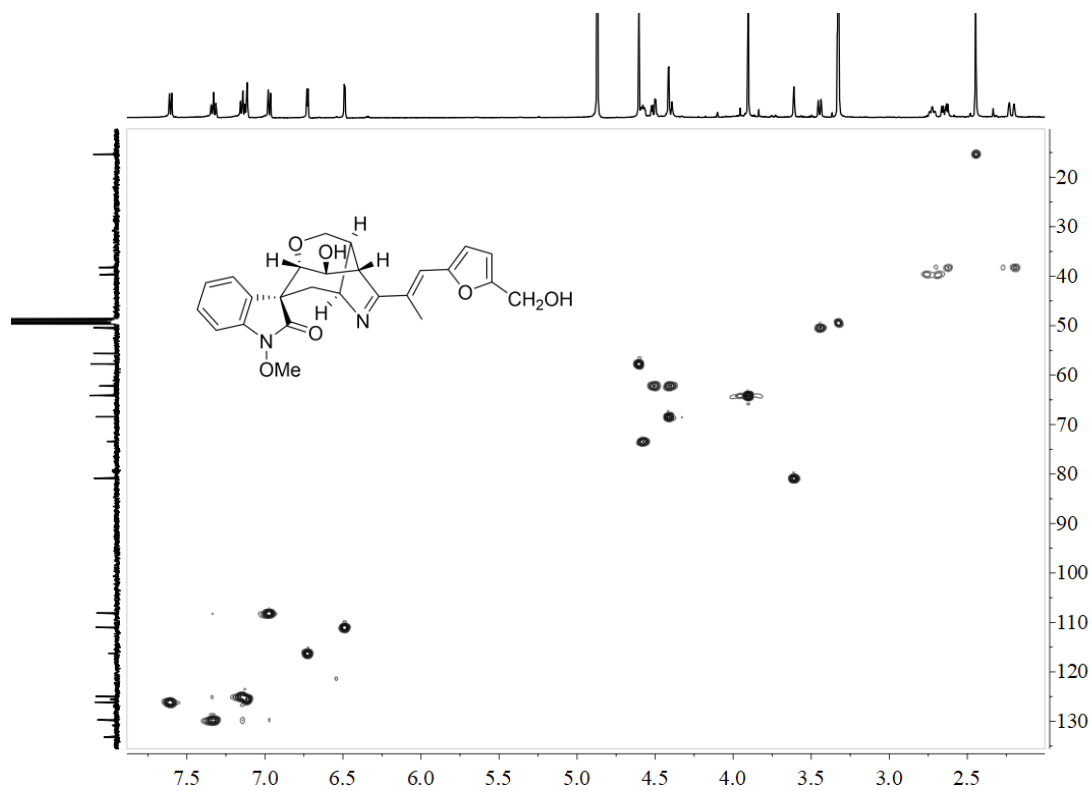

**Figure S51.** The HSQC spectrum of compound **5** in CD<sub>3</sub>OD

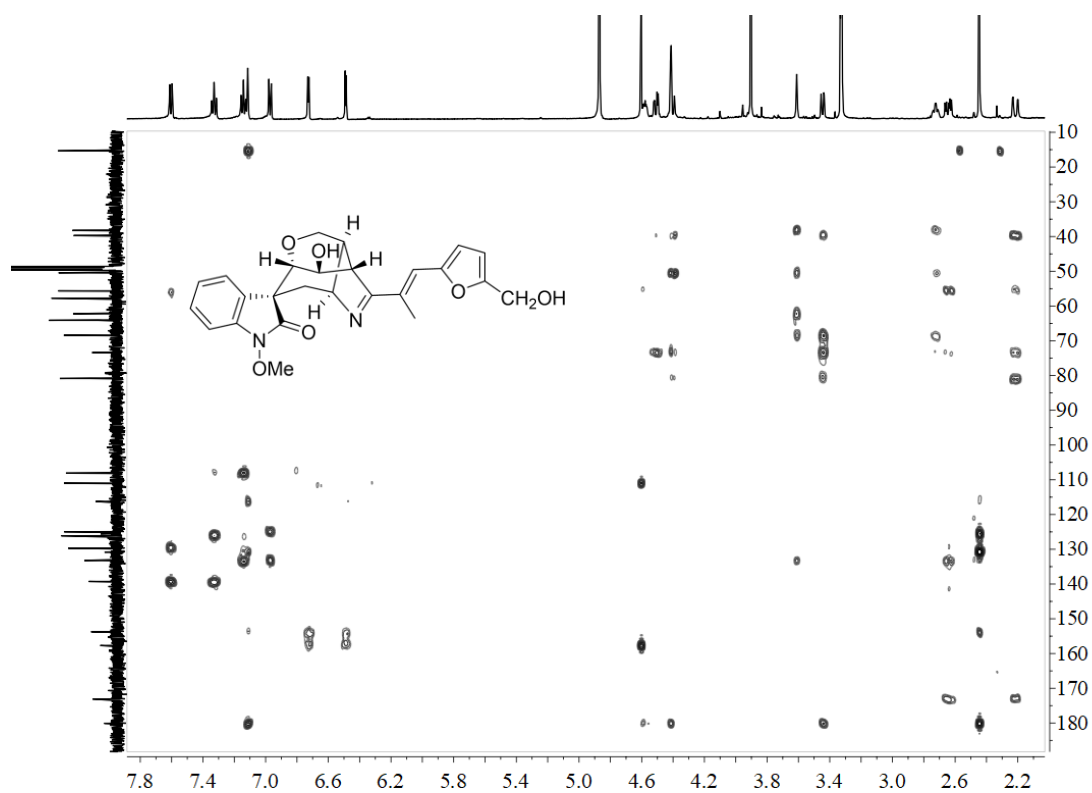

**Figure S52.** The HMBC spectrum of compound **5** in CD<sub>3</sub>OD

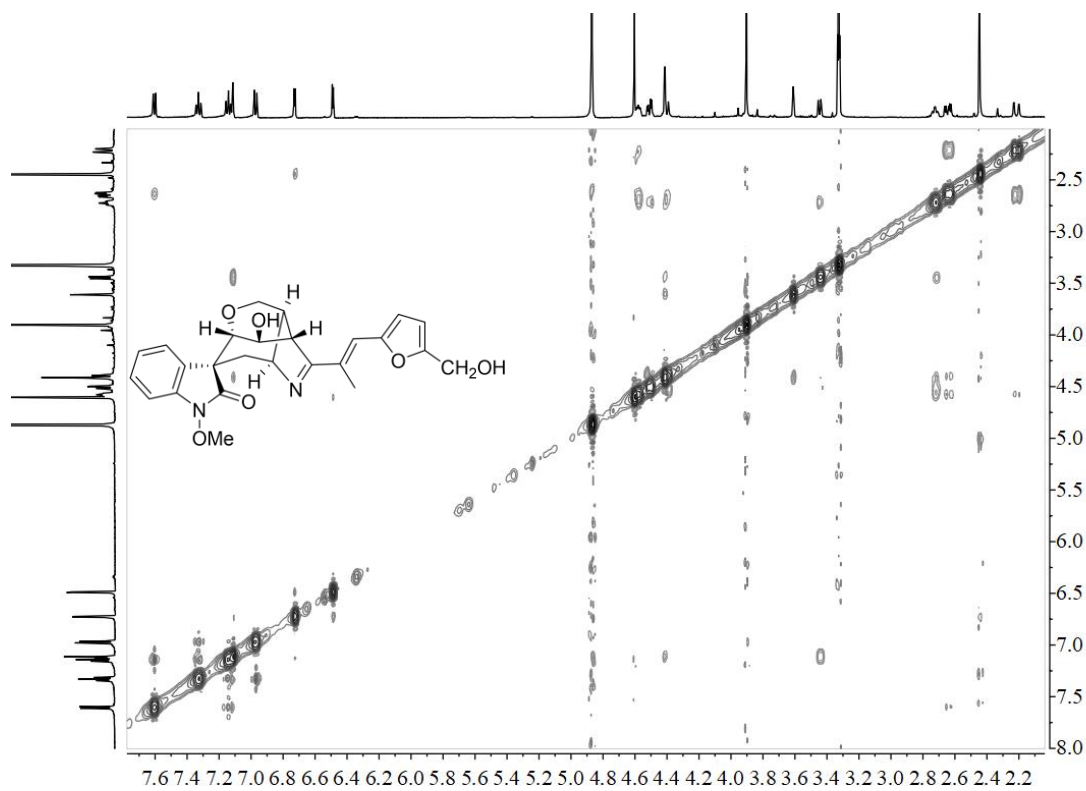

**Figure S53.** The NOESY spectrum of compound **5** in CD<sub>3</sub>OD

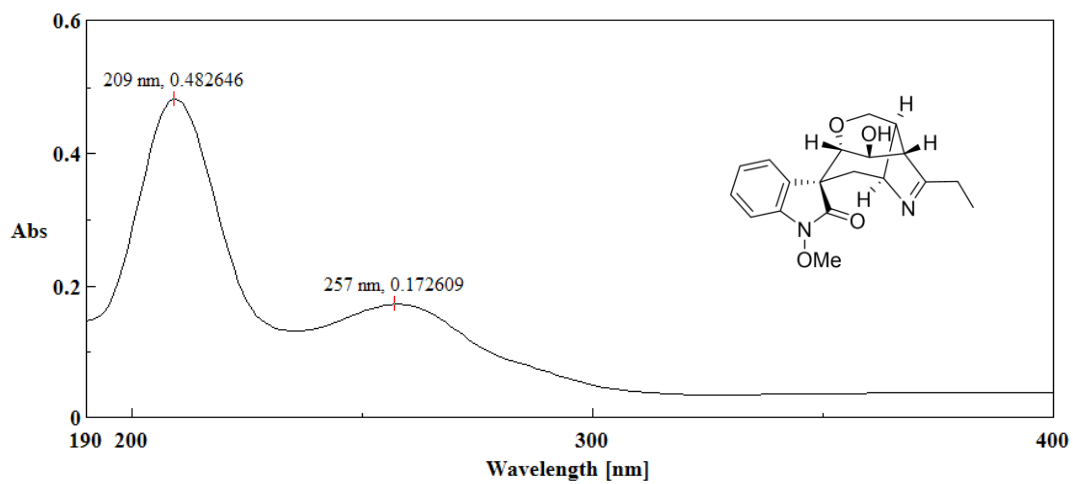

**Figure S54.** The UV of compound **6** in MeOH

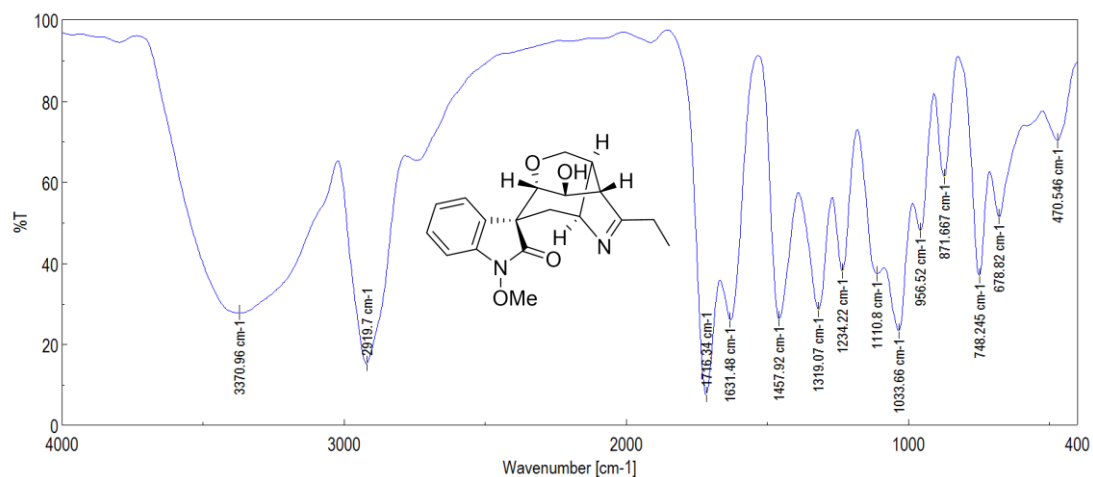

Figure S55. The IR (KBr disc) of compound 6

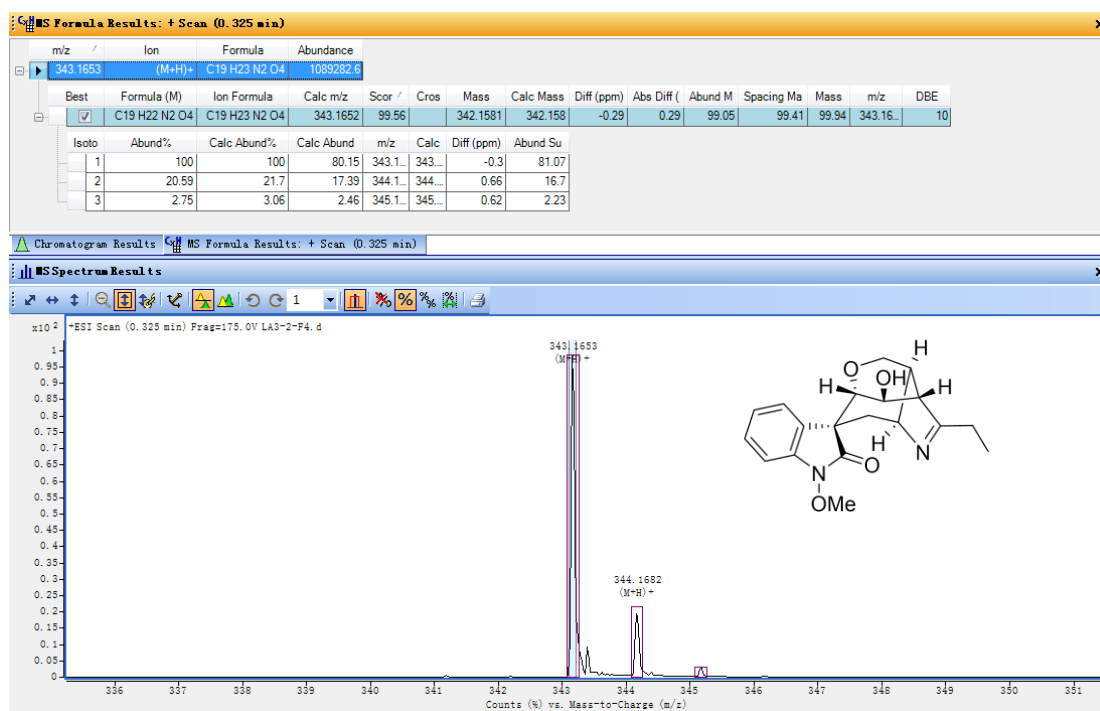

Figure S56. The HR-ESI-MS of compound 6

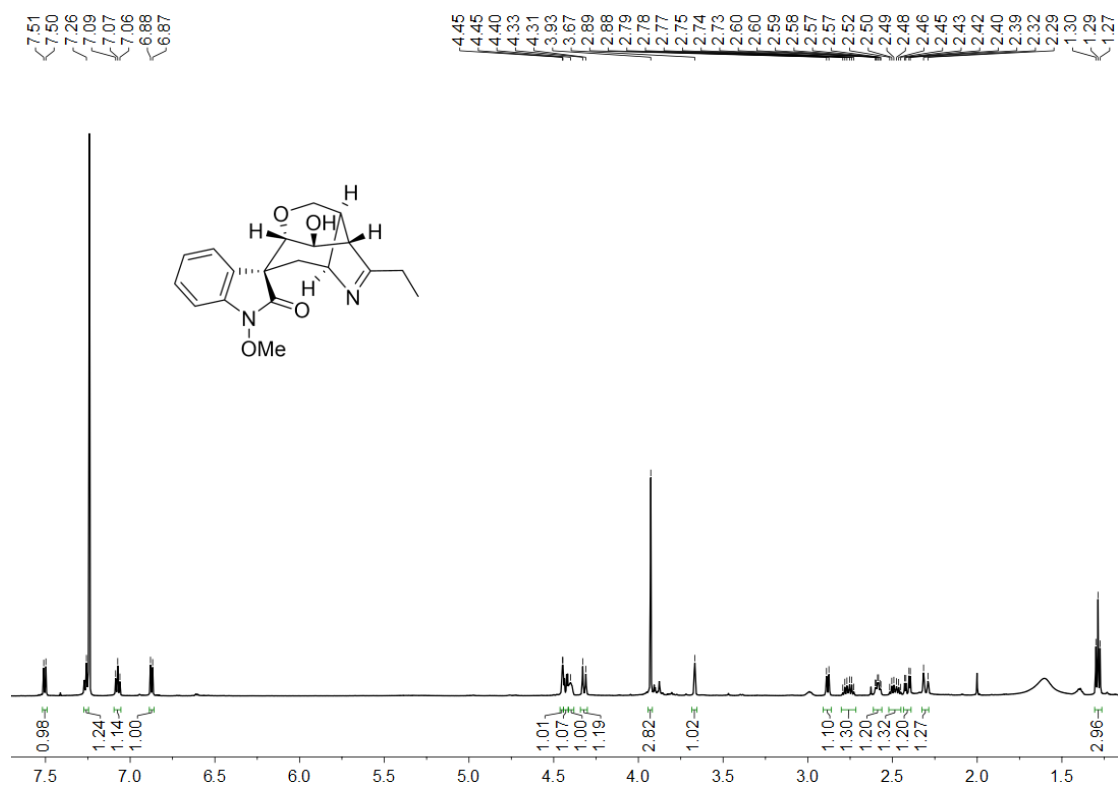

Figure S57. The <sup>1</sup>H NMR spectrum of compound 6 in CDCl<sub>3</sub>

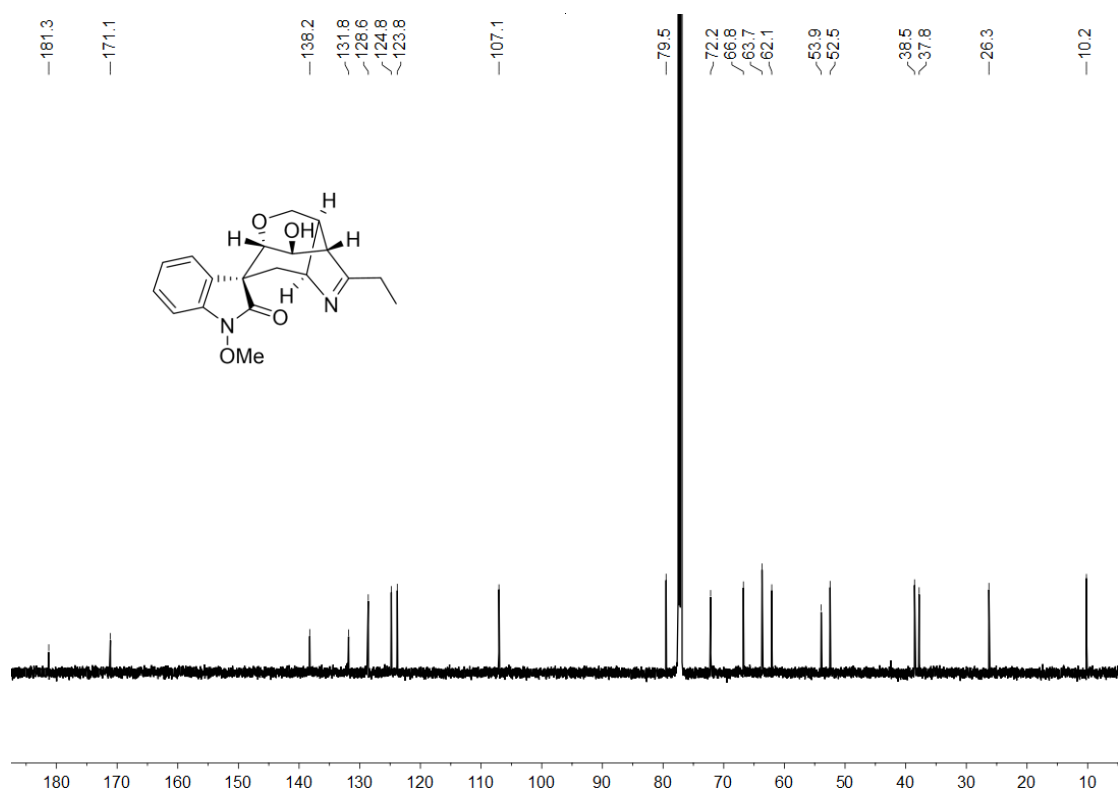

Figure S58. The <sup>13</sup>C NMR spectrum of compound 6 in CDCl<sub>3</sub>

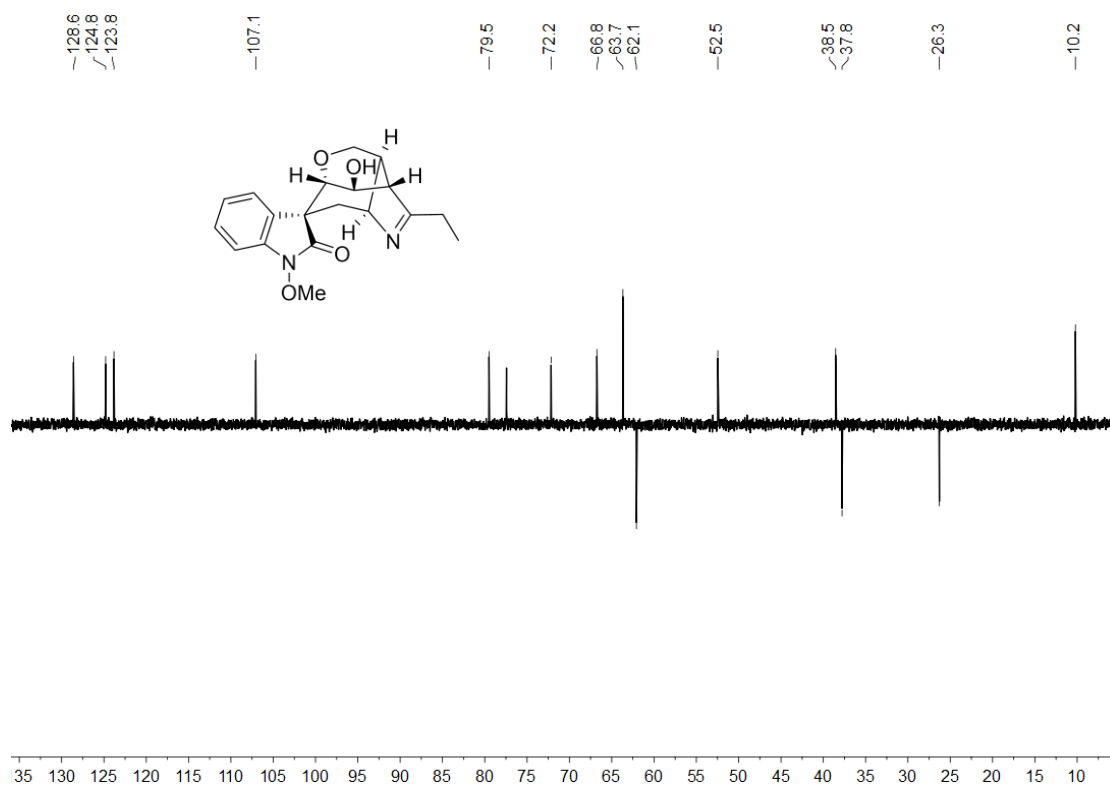

**Figure S59.** The DEPT-135 spectrum of compound **6** in CDCl<sub>3</sub>

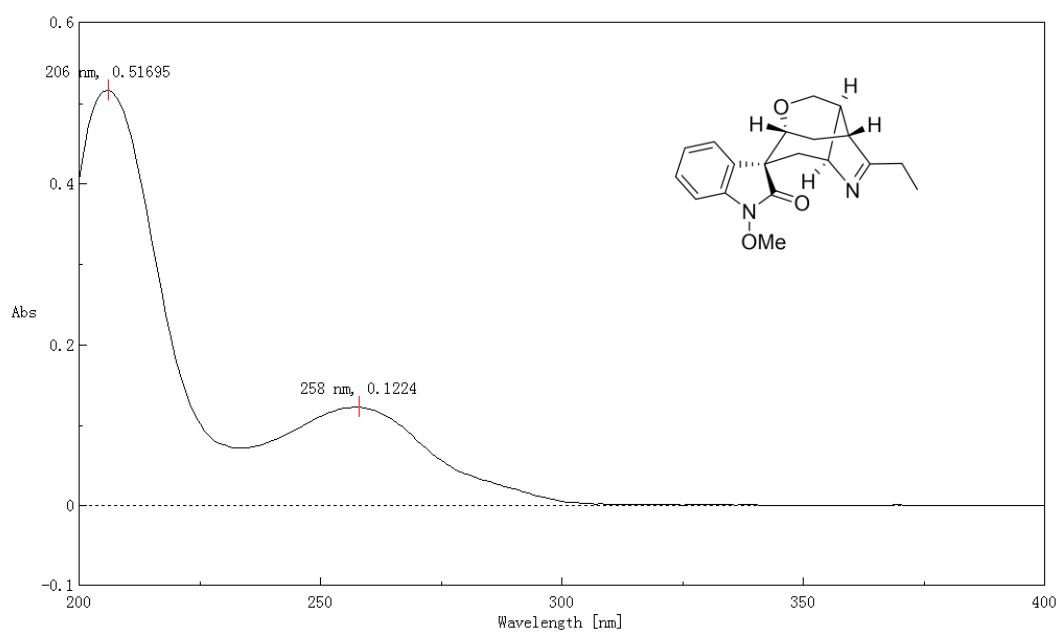

**Figure S60.** The UV of compound **7** in MeOH

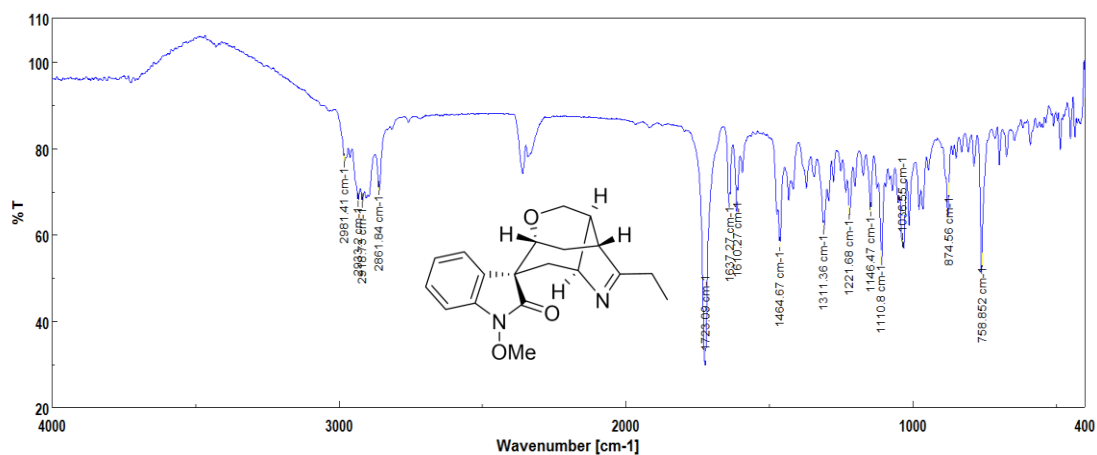

Figure S61. The IR (KBr disc) of compound 7

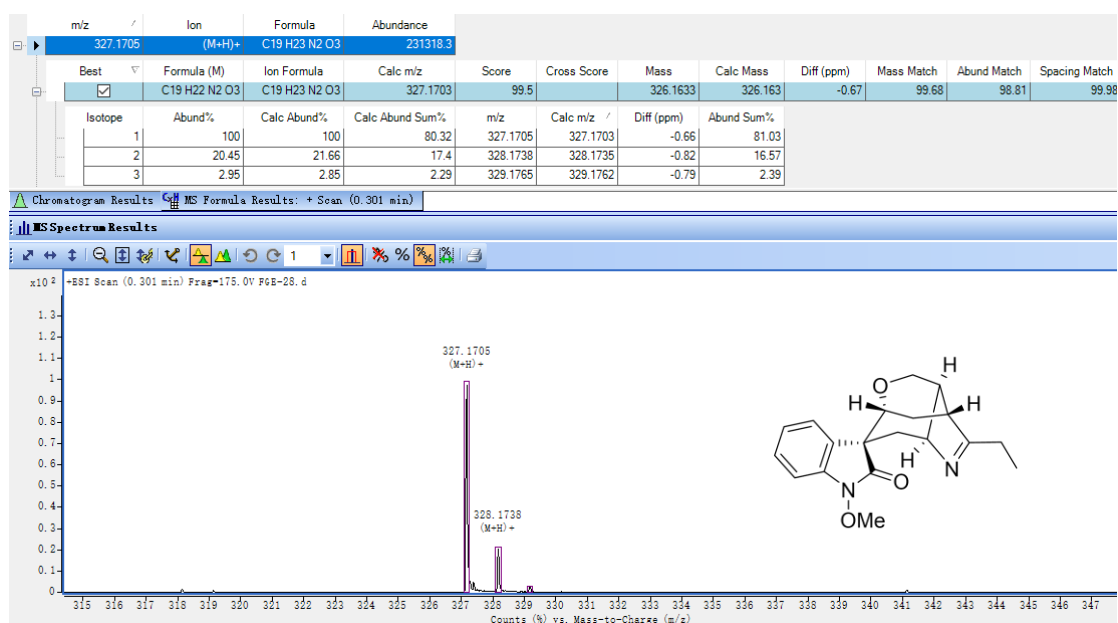

Figure S62. The ESI-MS of compound 7

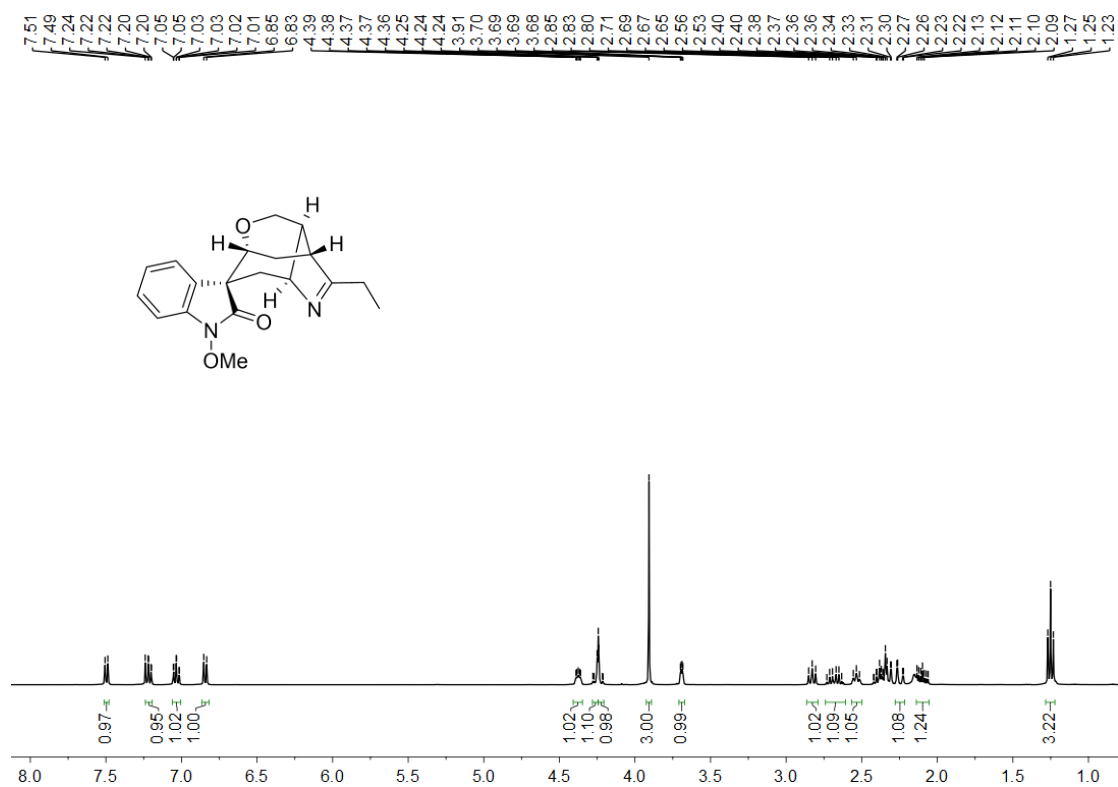

**Figure S63.** The  $^1\text{H}$  NMR spectrum of compound **7** in  $\text{CDCl}_3$

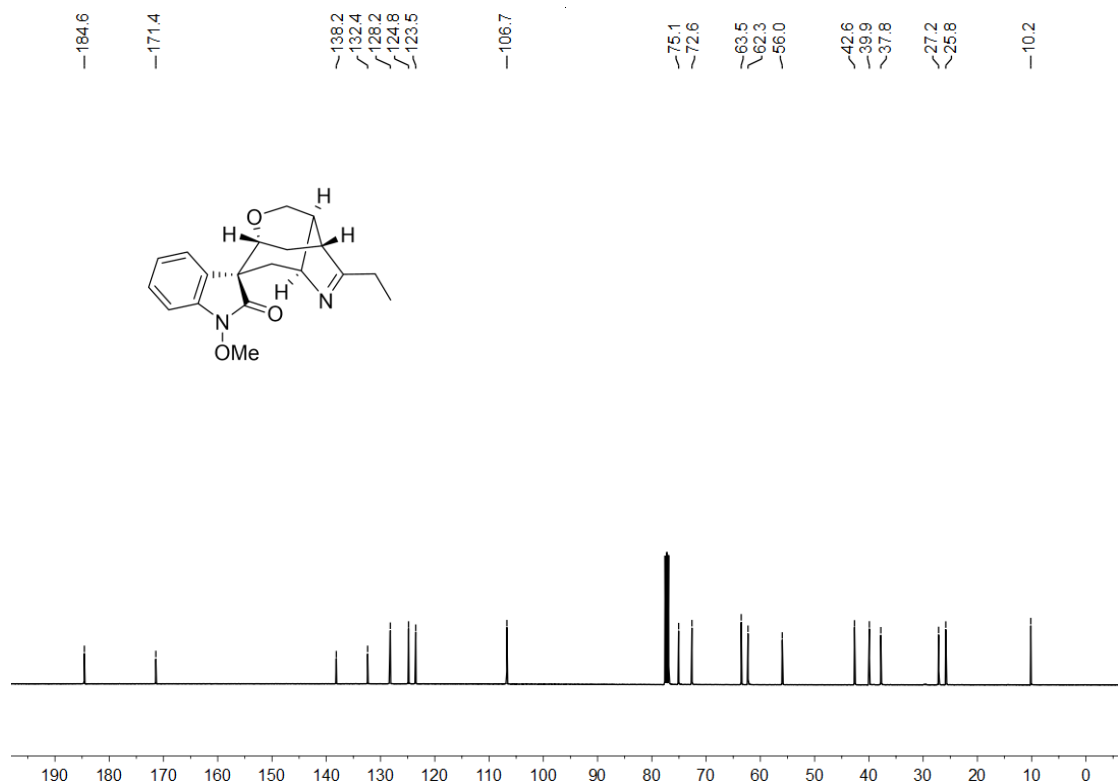

**Figure S64.** The  $^{13}\text{C}$  NMR spectrum of compound **7** in  $\text{CDCl}_3$

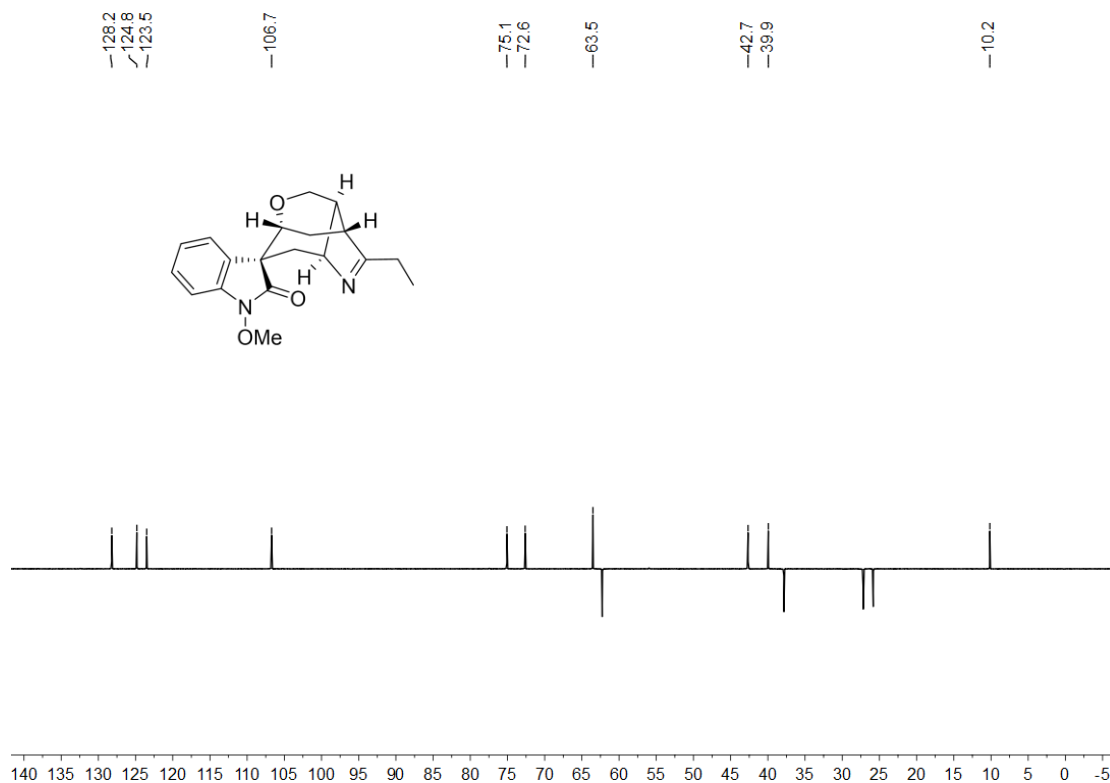

**Figure S65.** The DEPT-135 spectrum of compound **7** in CDCl<sub>3</sub>

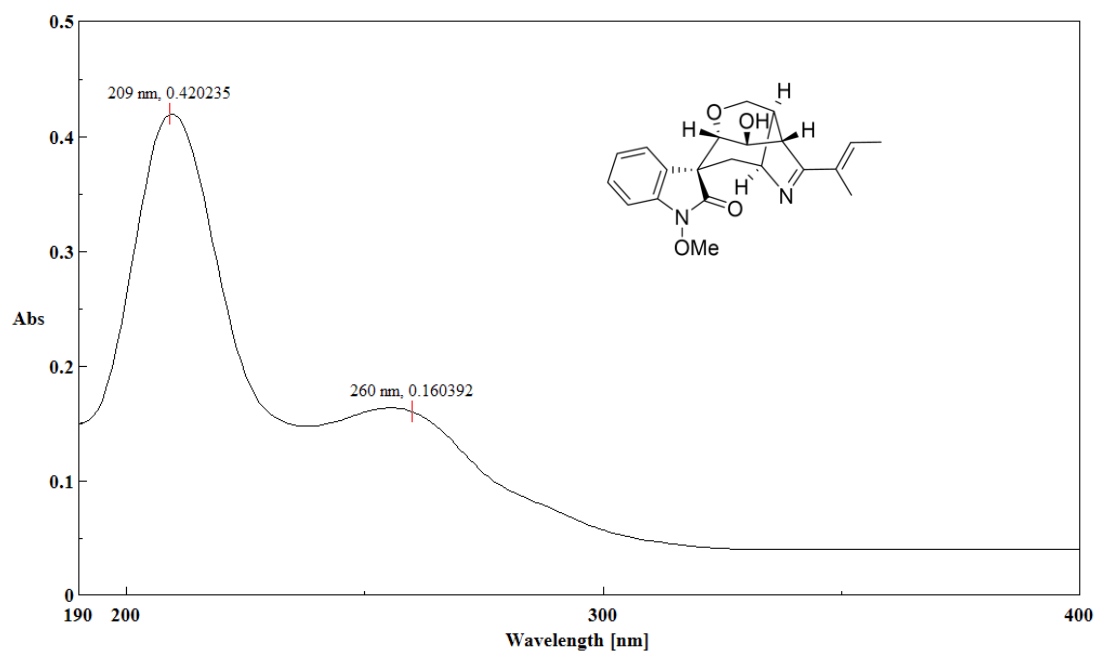

**Figure S66.** The UV of compound **8** in MeOH



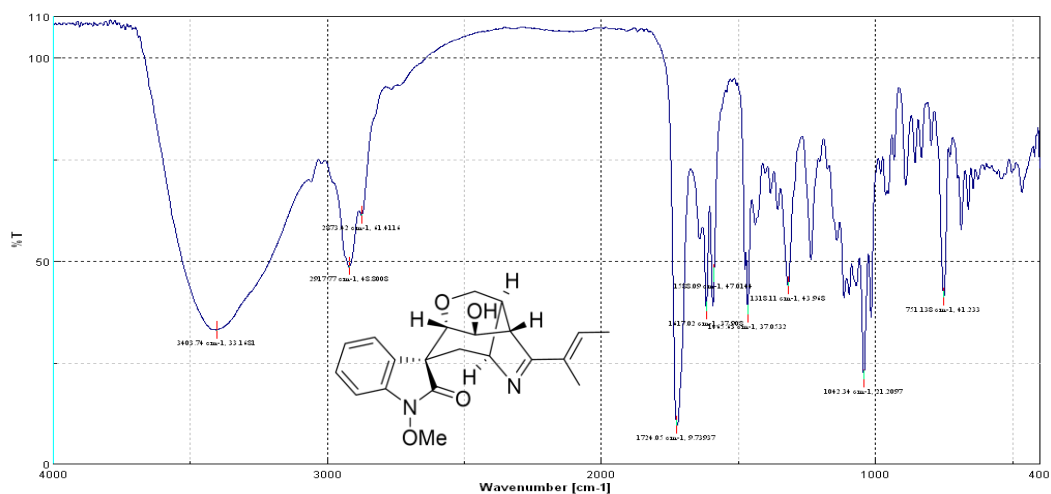

**Figure S67.** The IR (KBr disc) of compound **8**

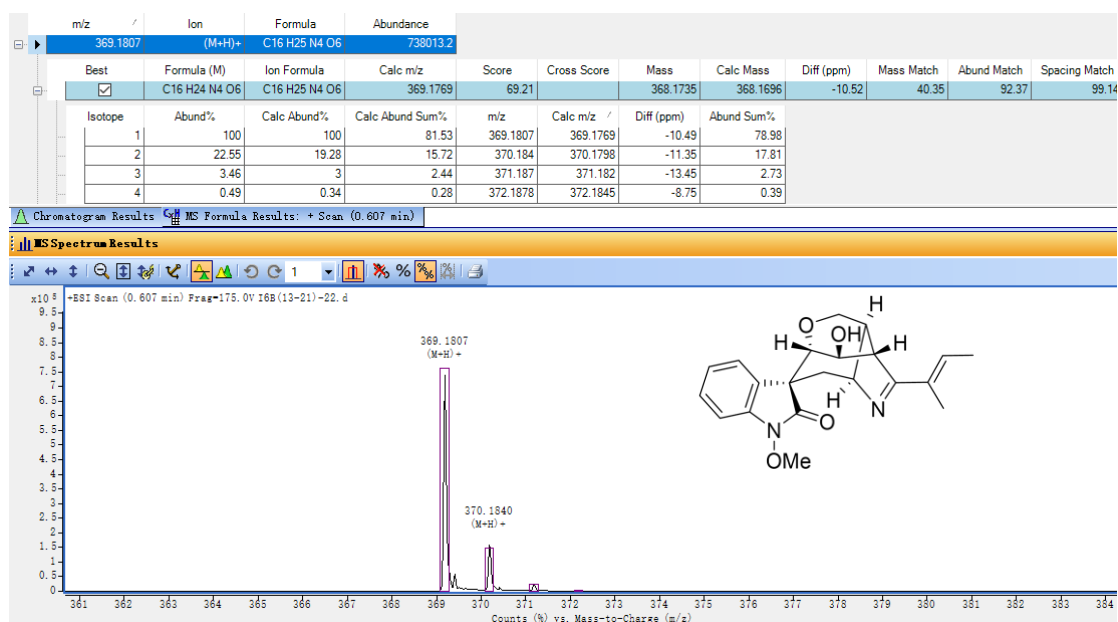

**Figure S68.** The HR-ESI-MS of compound **8**

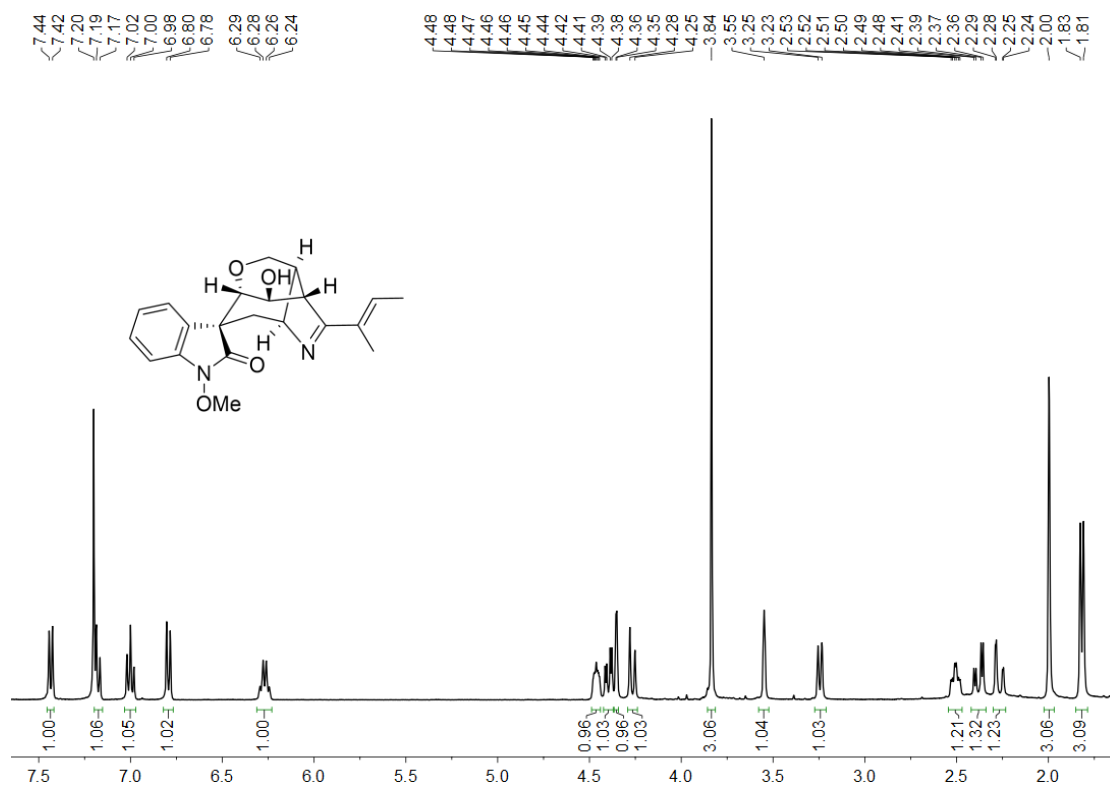

**Figure S69.** The  $^1\text{H}$  NMR spectrum of compound **8** in  $\text{CDCl}_3$

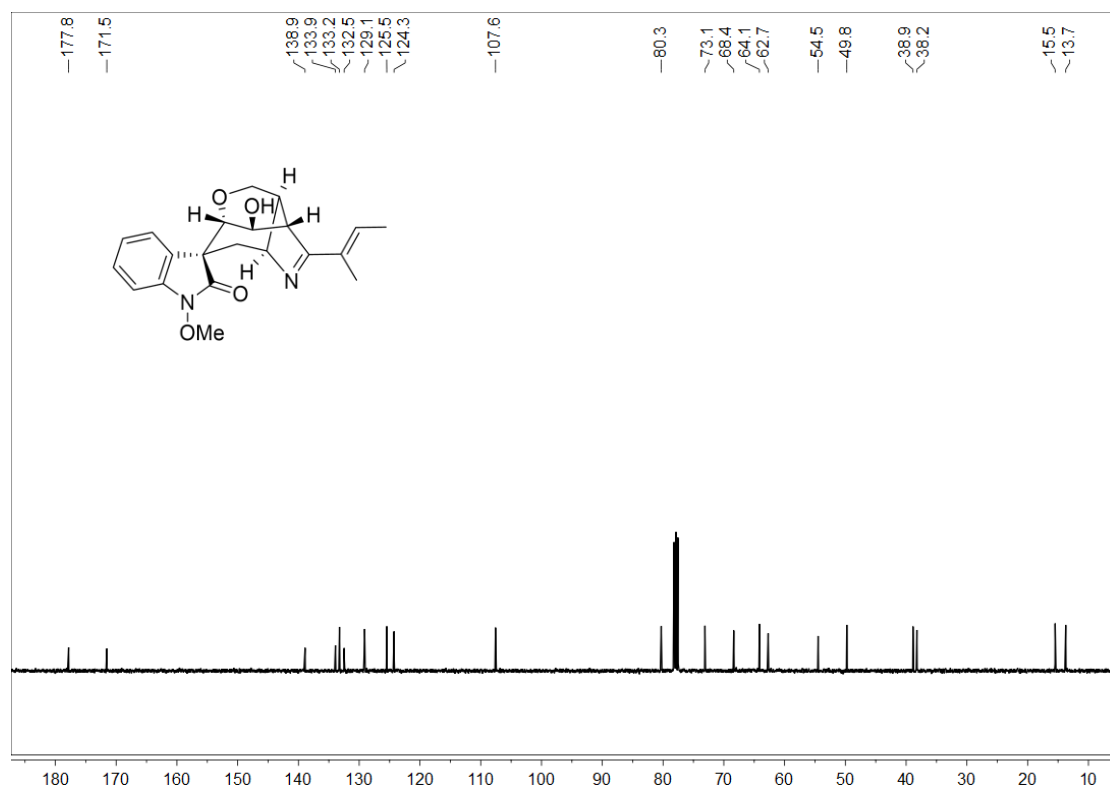

**Figure S70.** The  $^{13}\text{C}$  NMR spectrum of compound **8** in  $\text{CDCl}_3$

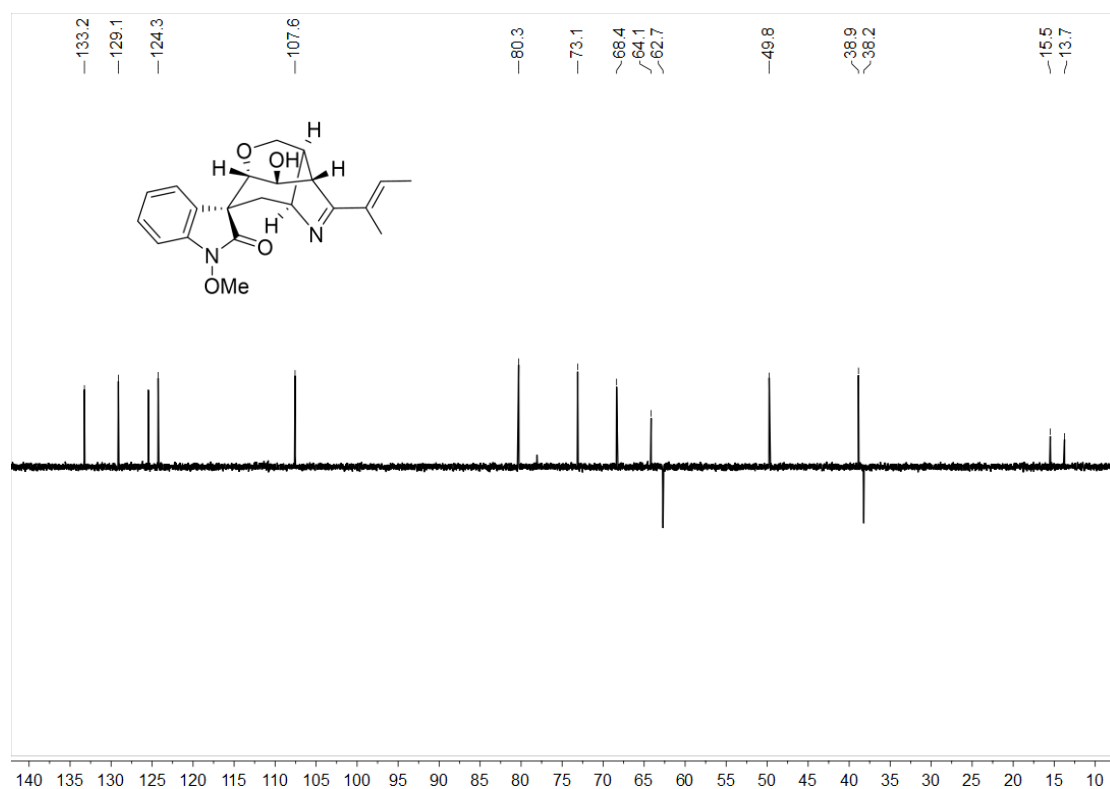

**Figure S71.** The DEPT-135 spectrum of compound **8** in  $\text{CDCl}_3$

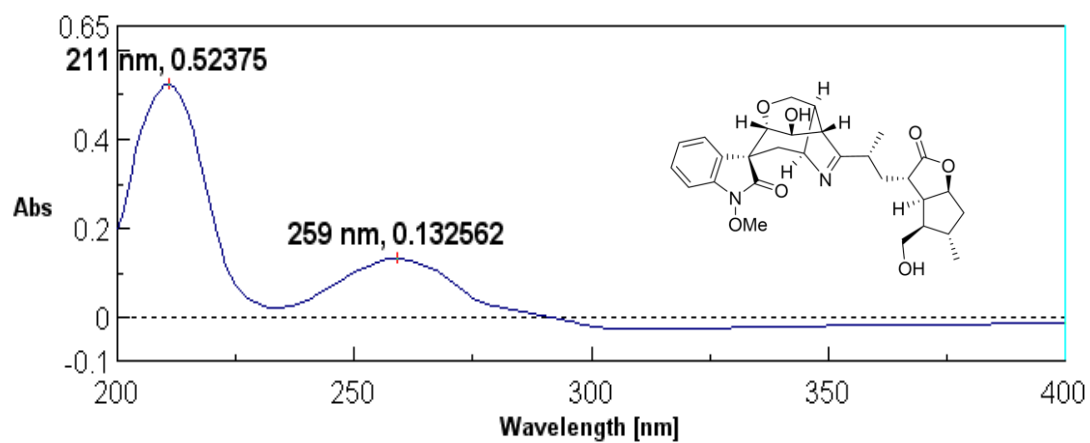

**Figure S72.** The UV of compound **9** in MeOH

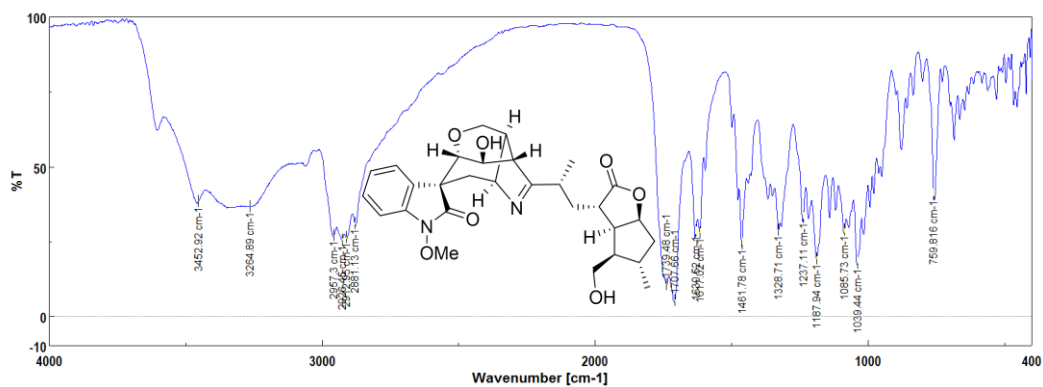

Figure S73. The IR (KBr disc) of compound **9**

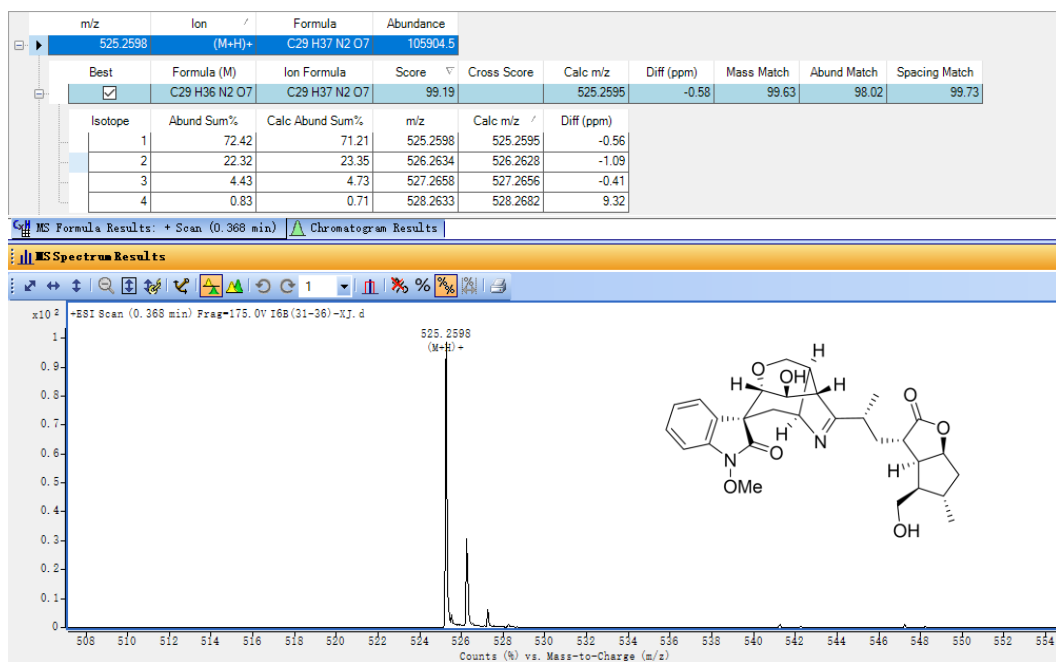

Figure S74. The HR-ESI-MS of compound **9**

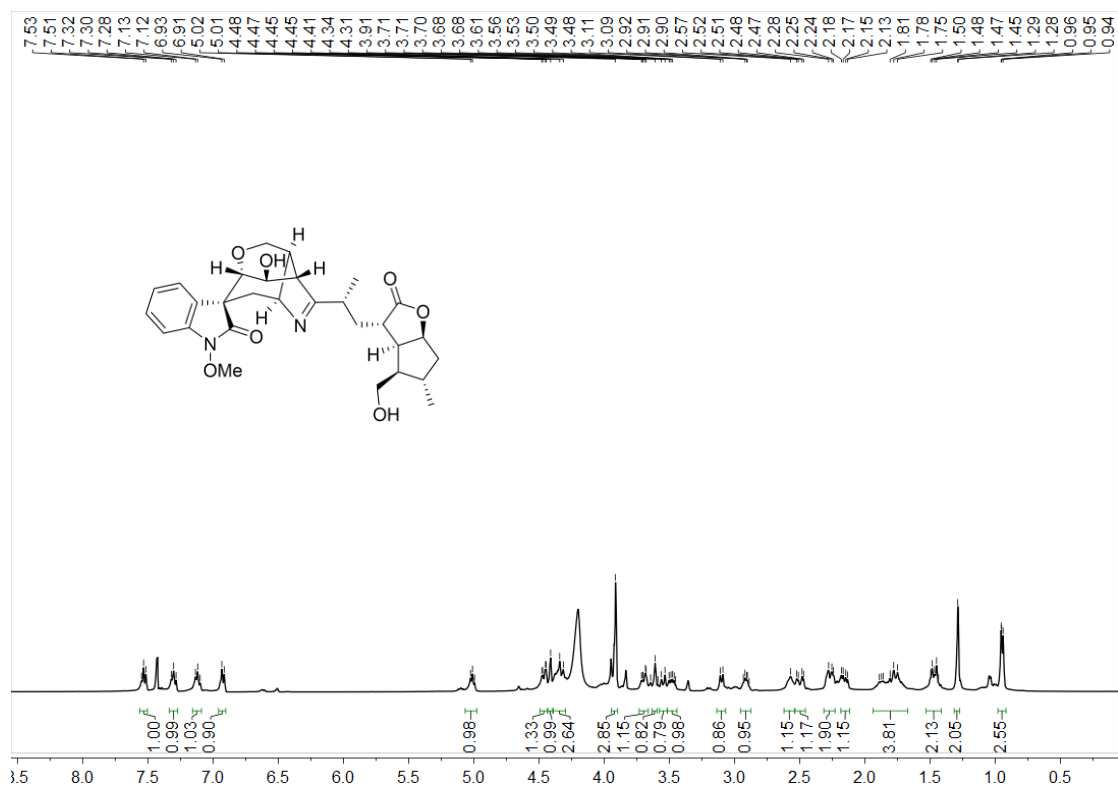

**Figure S75.** The  $^1\text{H}$  NMR spectrum of compound **9** in  $\text{CDCl}_3$  (80%) +  $\text{CD}_3\text{OD}$  (20%)

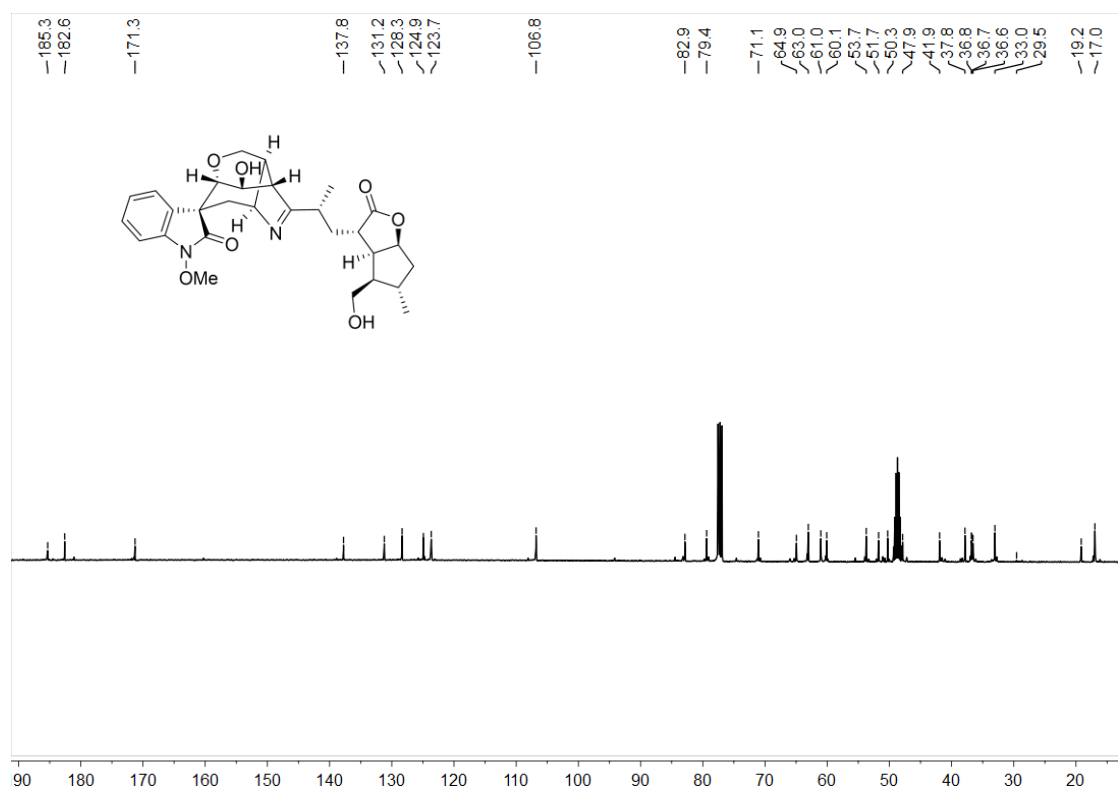

**Figure S76.** The  $^{13}\text{C}$  NMR spectrum of **9** in  $\text{CDCl}_3$  (80%) +  $\text{CD}_3\text{OD}$  (20%)

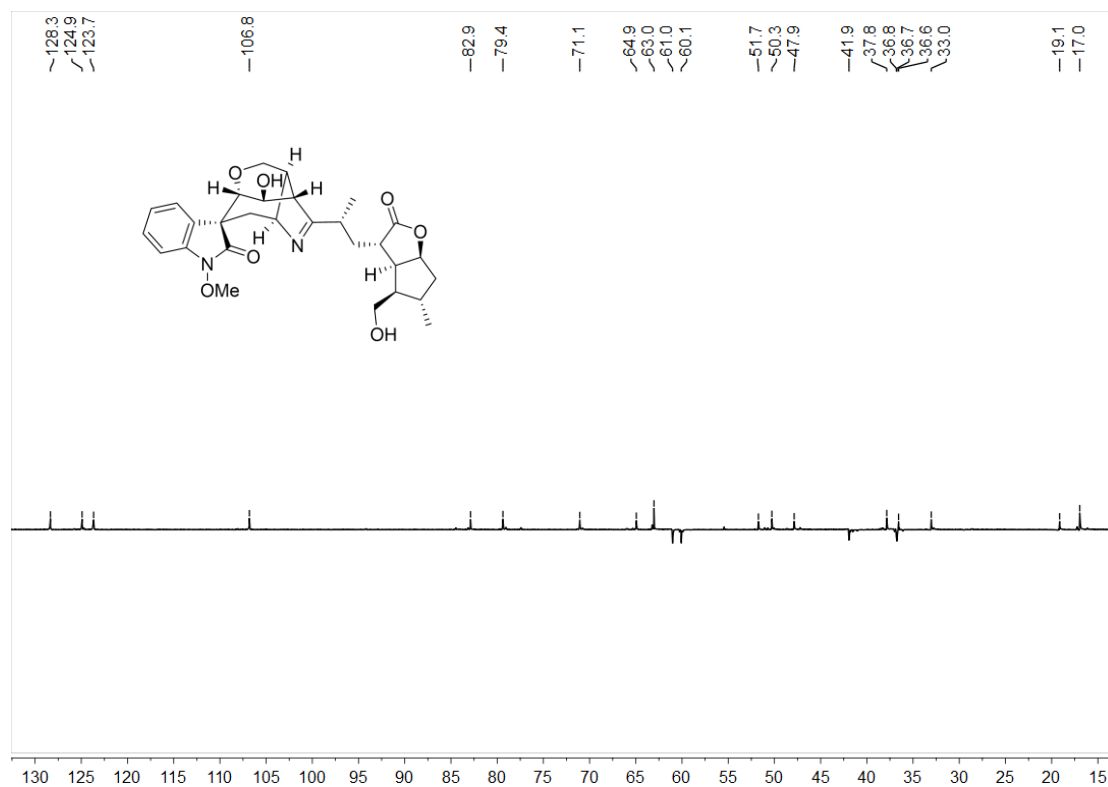

**Figure S77.** The DEPT-135 spectrum of **9** in  $\text{CDCl}_3$  (80%) +  $\text{CD}_3\text{OD}$  (20%)

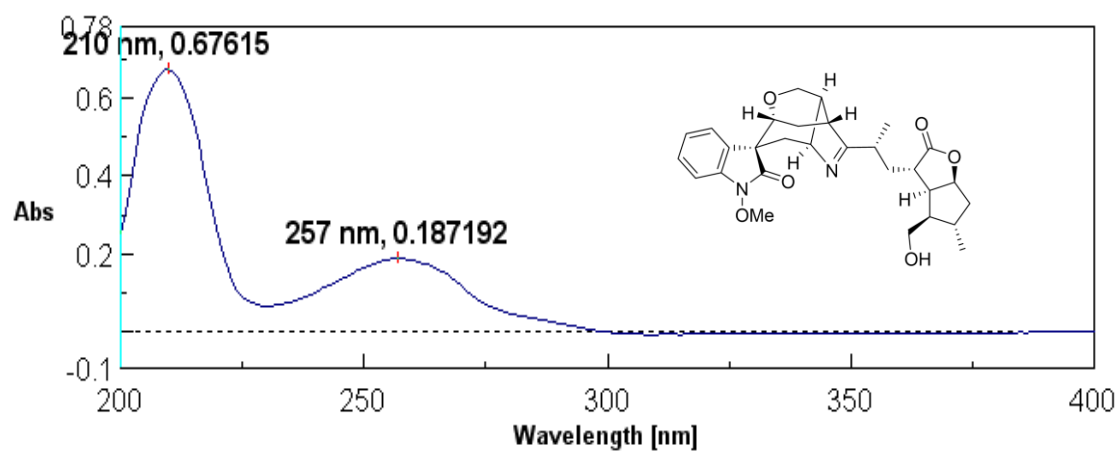

**Figure S78.** The UV of compound **10** in MeOH

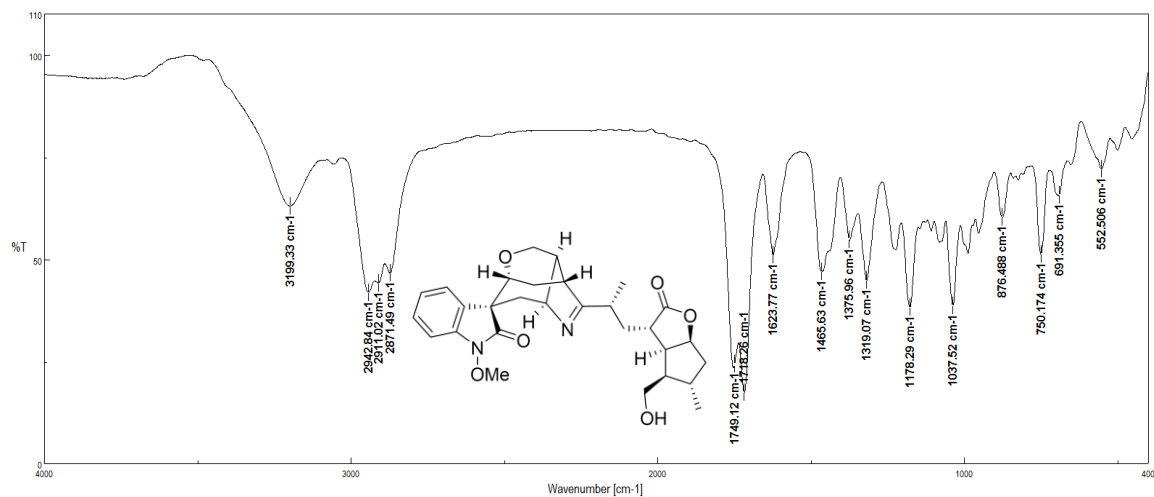

**Figure S79.** The IR (KBr disc) of compound **10**

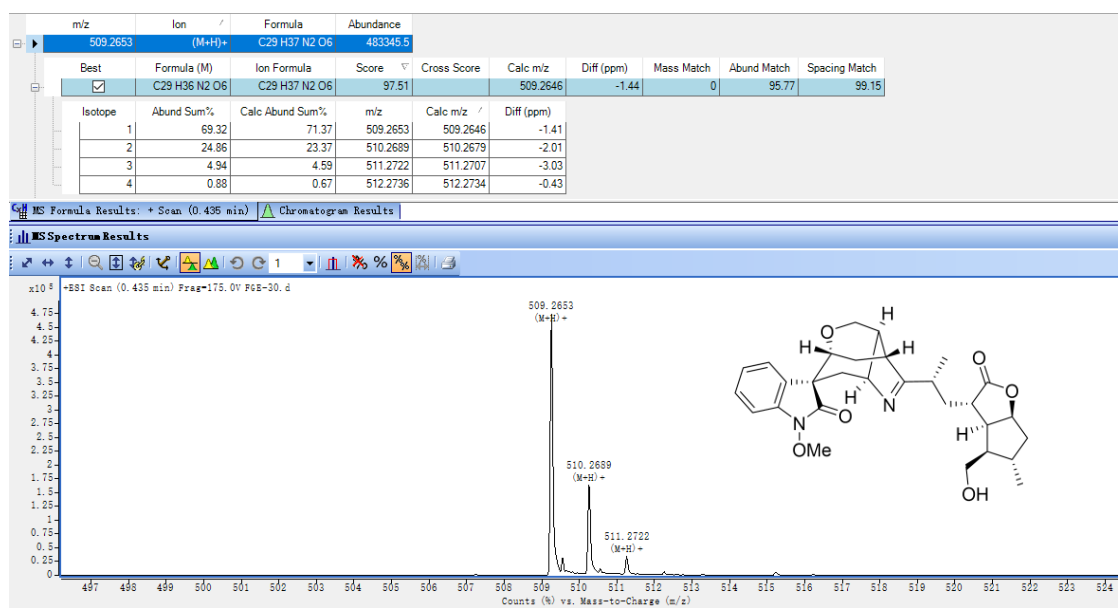

**Figure S80.** The HR-ESI-MS of compound **10**

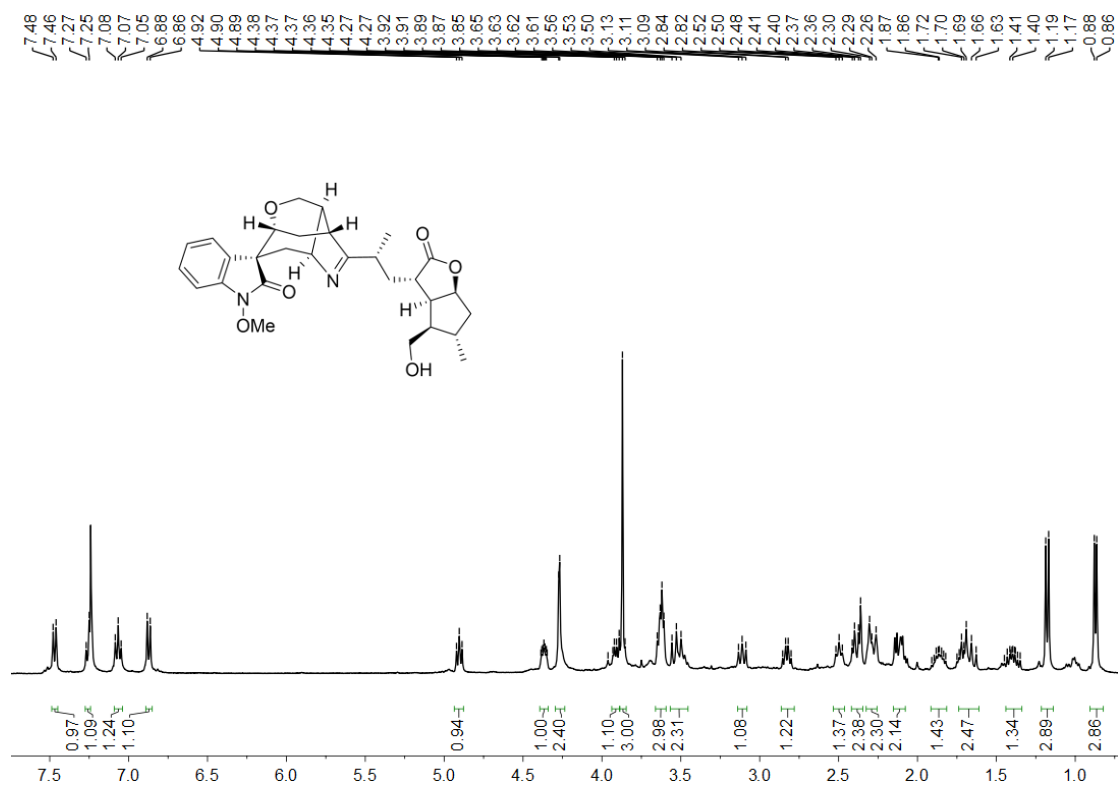

**Figure S81.** The  $^1\text{H}$  NMR spectrum of compound **10** in  $\text{CDCl}_3$

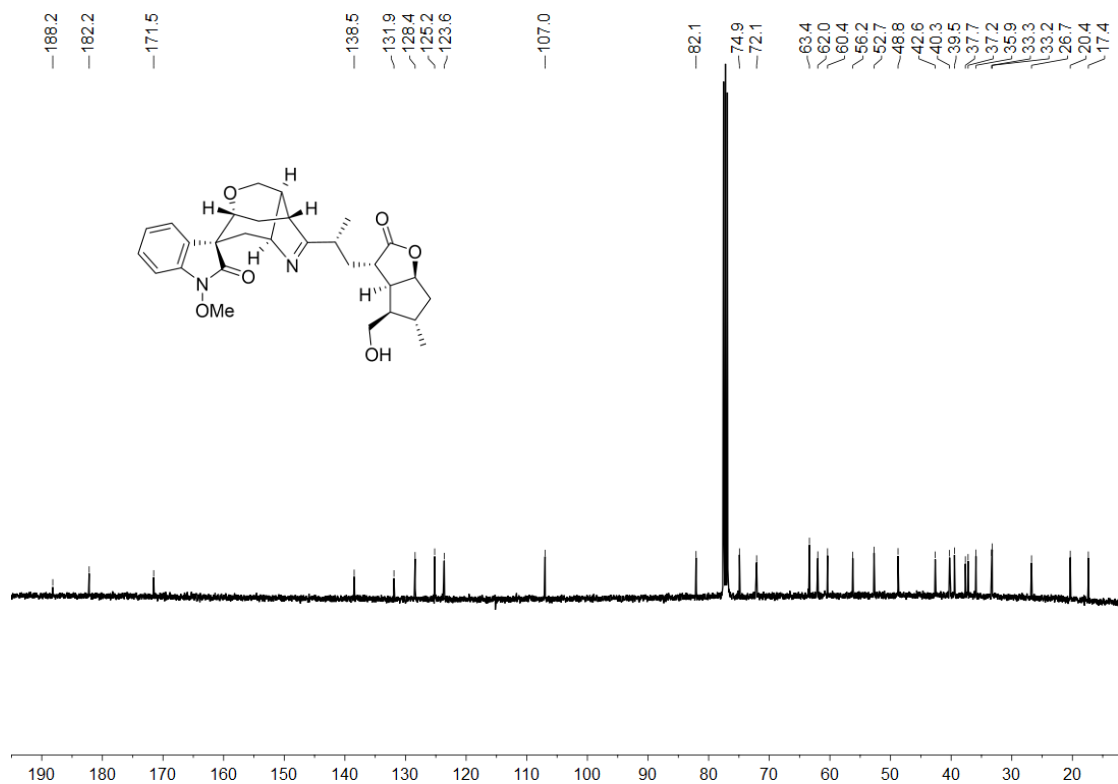

**Figure S82.** The  $^{13}\text{C}$  NMR spectrum of **10** in  $\text{CDCl}_3$



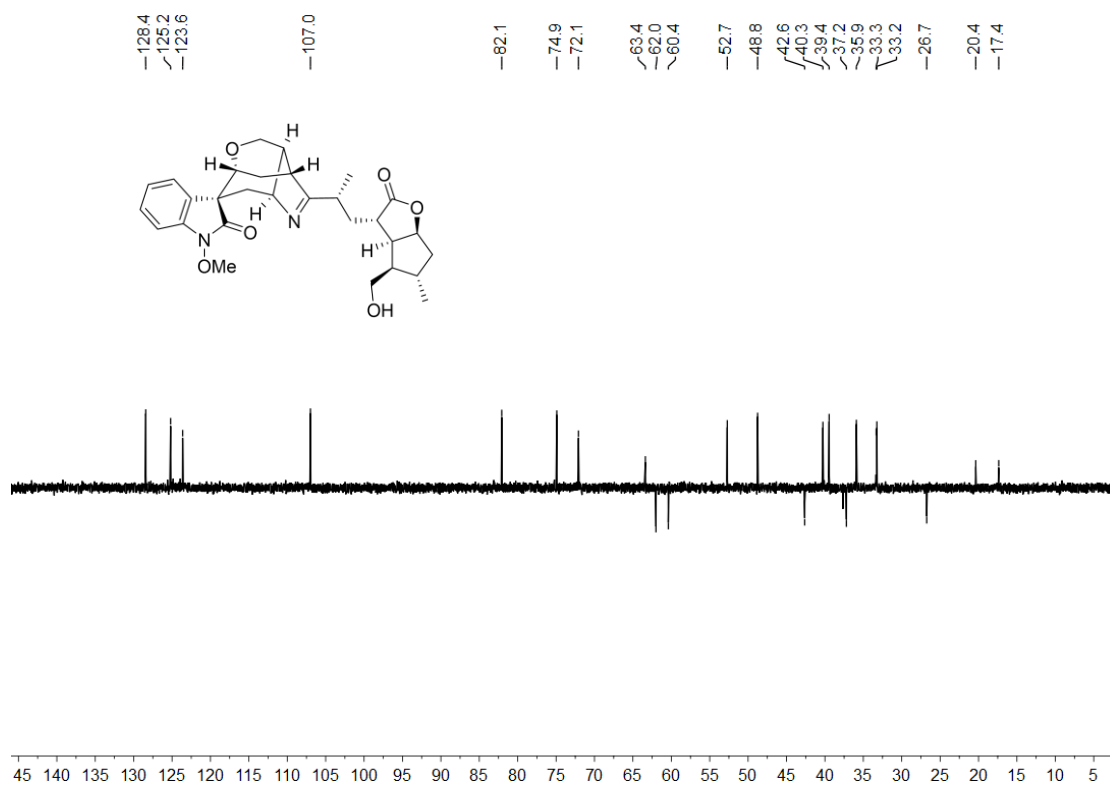

**Figure S83.** The DEPT-135 spectrum of **10** in CDCl<sub>3</sub>

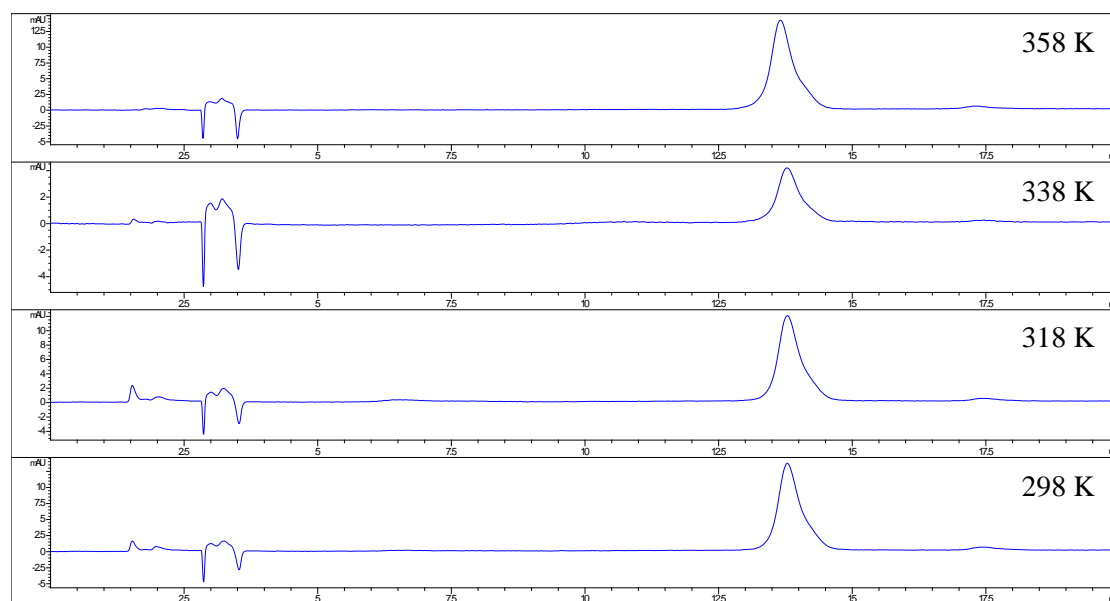

**Figure S84.** Dynamic HPLC spectra of **4** with temperature increase

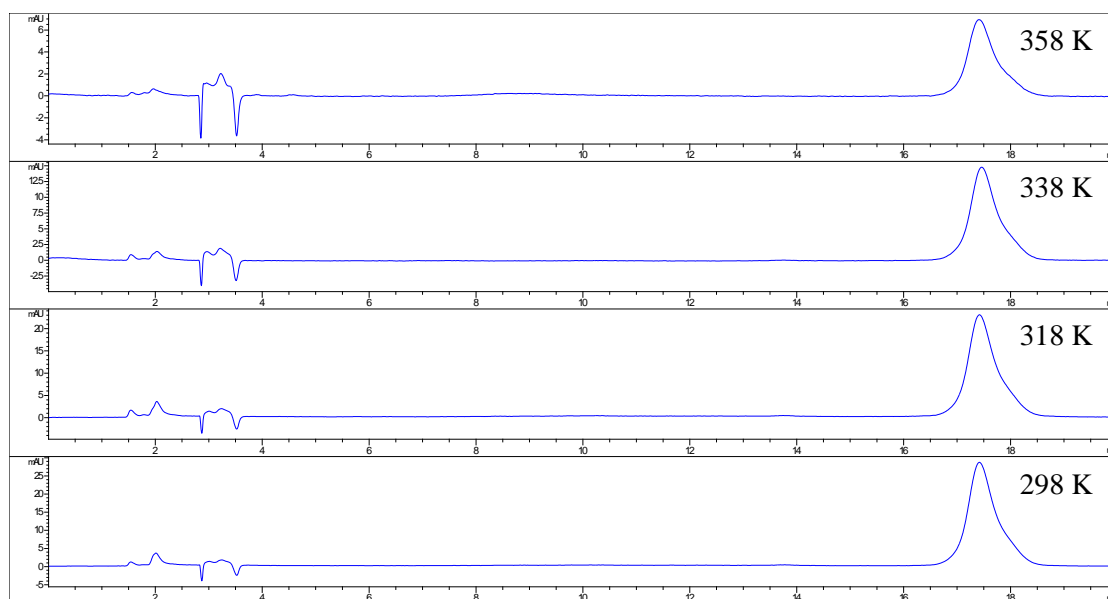

**Figure S85.** Dynamic HPLC spectra of **5** with temperature increase

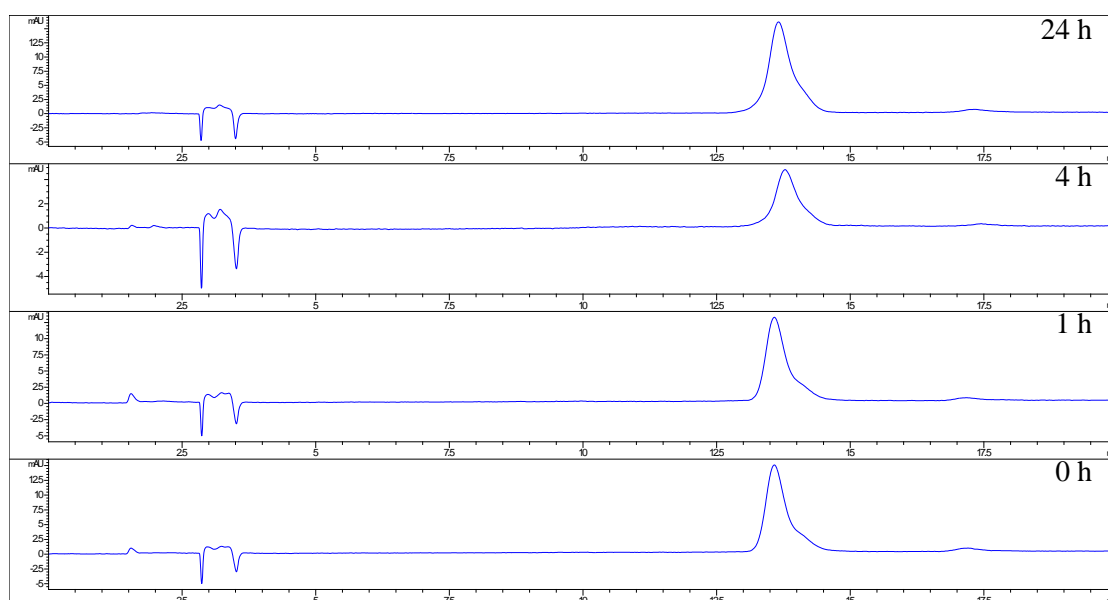

**Figure S86.** Dynamic HPLC spectra of **4** with visible light irradiation

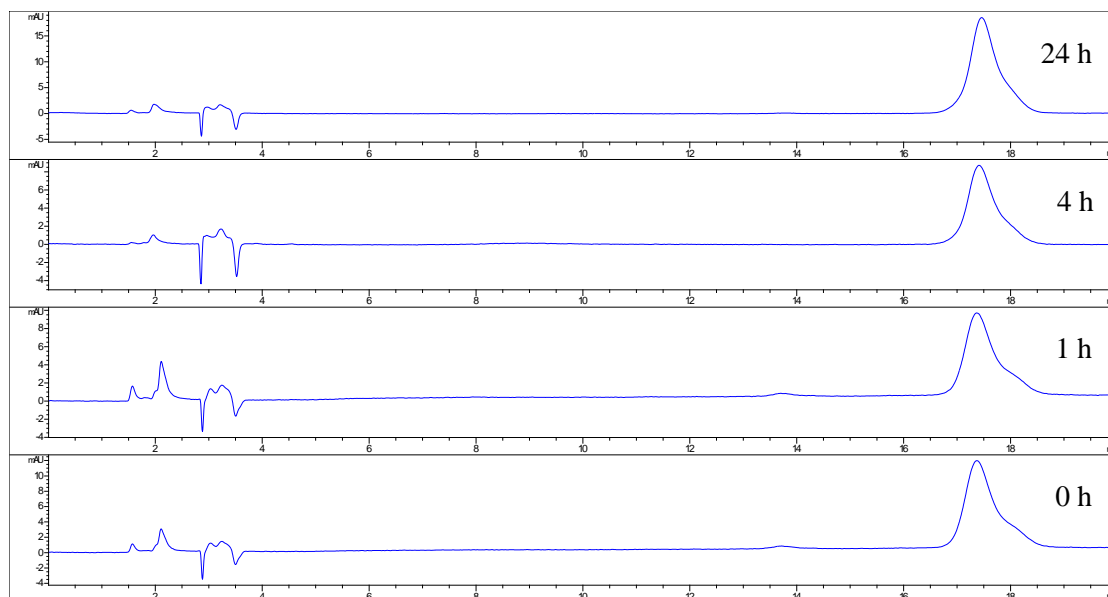

**Figure S87.** Dynamic HPLC spectra of **5** with visible light irradiation

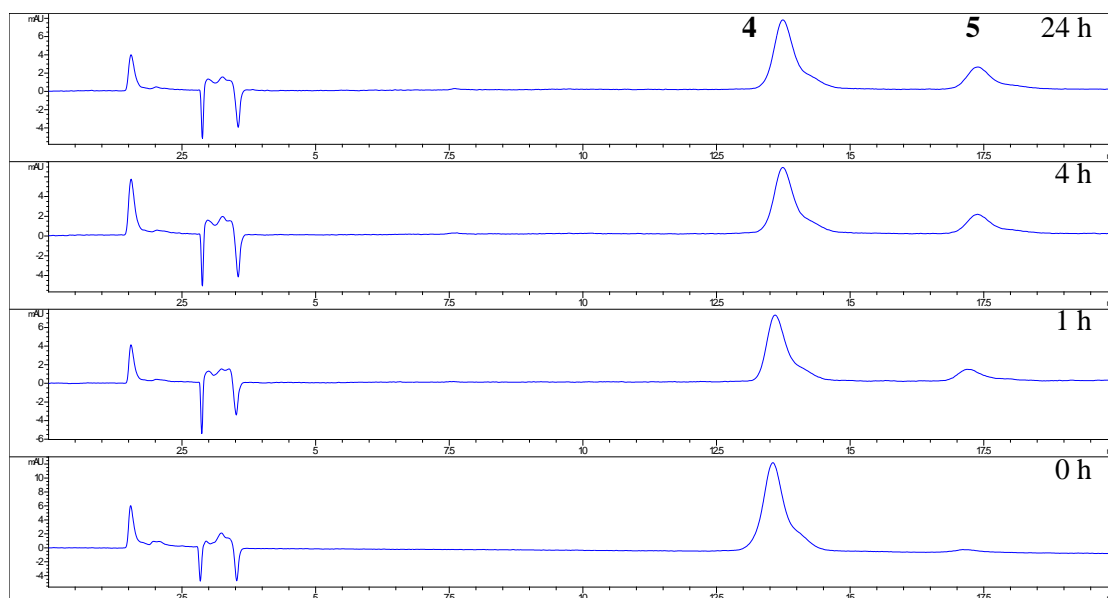

**Figure S88.** Dynamic HPLC spectra of **4** with UV irradiation in 254 nm

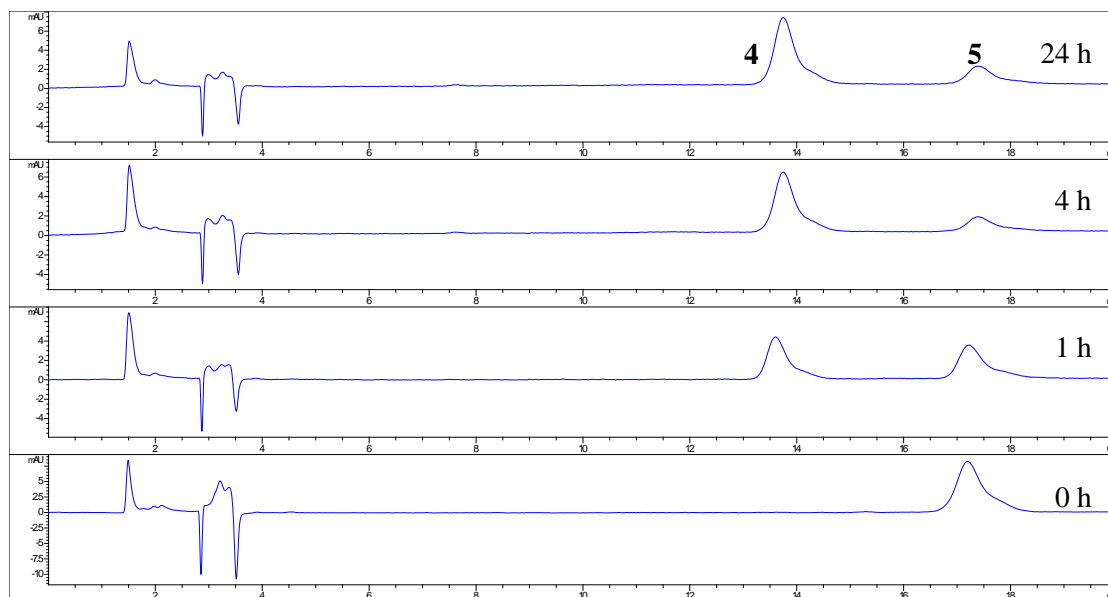

**Figure S89.** Dynamic HPLC spectra of **5** with UV irradiation in 254 nm

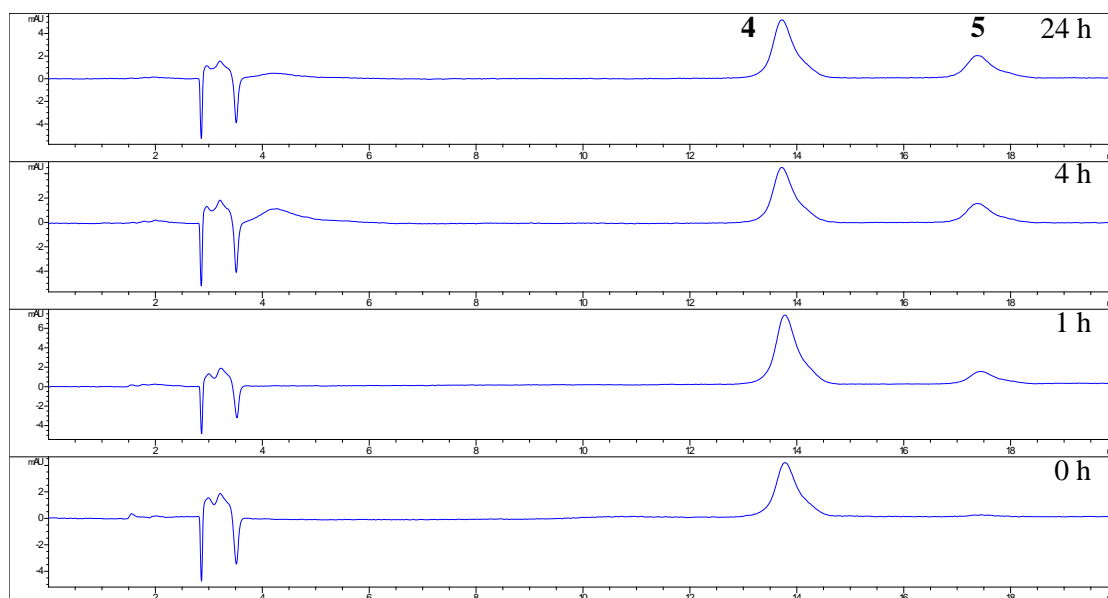

**Figure S90.** Dynamic HPLC spectra of **4** with UV irradiation in 365 nm

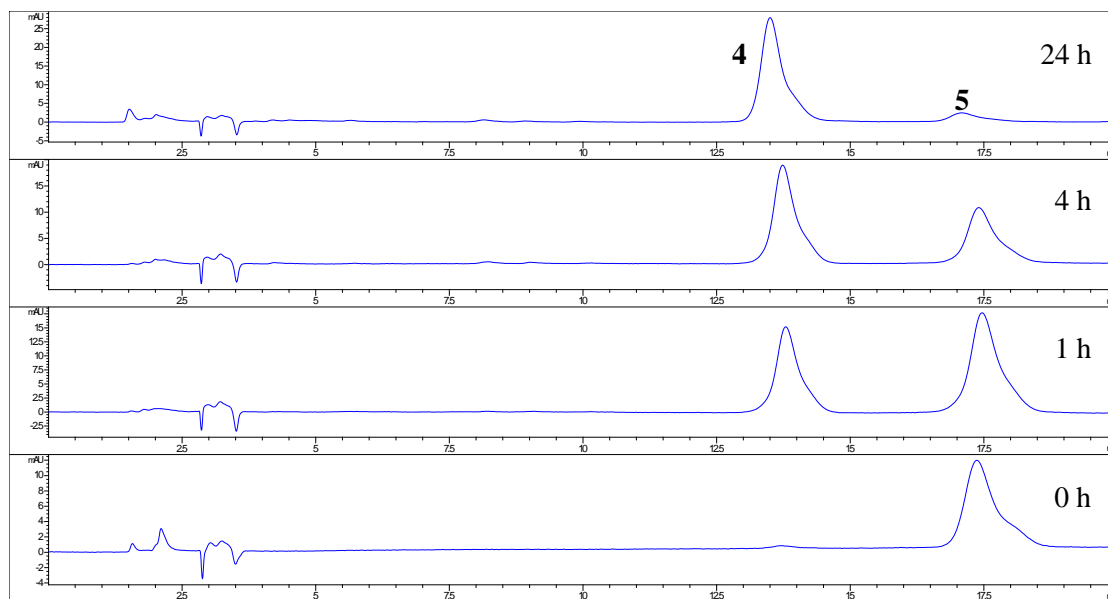

**Figure S91.** Dynamic HPLC spectra of **5** with UV irradiation in 365 nm

## Reference

- 1 D. Ponglux, S. Wongseripipatana, S. Subhadhirasakul, H. Takayama, M. Yokota, K. Okata, C. Phisalaphong, N. Aimi and S. Sakai, Studies on the indole alkaloids of *Gelsemium elegans* (Thailand). Structure elucidation and proposal of a biogenetic route, *Tetrahedron*, 1988, **44**, 5075-5094.
- 2 L. Z. Lin, G. A. Cordel, Gelsamydine, an indole alkaloid from *Gelsemium elegans* with two monoterpene units, *J. Org. Chem.* 1989, **54**, 3199-3202.
- 3 Q. Xue, J. Hu, X. C. Liu, J. Gu, Cytotoxic gelsedine-type indole alkaloids from *Gelsemium elegans*, *J. Asian. Nat. Prod. Res.*, 2020, **22**, 1138-1144.
- 4 Y. K. Xu, S. P. Yang, S. G. Liao, H. Zhang, L. P. Lin, J. Ding, J. M. Yue, Alkaloids from *Gelsemium elegans*, *J. Nat. Prod.*, 2006, **69**, 1347-1350.
